# Supplementary material for: Network reconstruction and systems analysis of plant cell wall deconstruction by Neurospora crassa
Source: Biotechnol Biofuels. 2017 Sep 21;10:225. doi: 10.1186/s13068-017-0901-2 (PMC5609067; doi:10.1186/s13068-017-0901-2)
Supplement: Supplementary file 1 — Additional file 1. List of reactions, compounds and genes in the plant cell wall degradation network (PCWDN) of N. crassa. The first, second and third sheets contain the list of reactions, genes and compounds, respectively, in the PCWDN. The fourth sheet gives the participation of the PCWDN genes in the cellulose, hemicellulose, pectin and starch degradation pathways. The fifth and sixth sheets contain the feature matrix and annotation confidence scores, respectively, for genes in the PCWDN of N. crassa based on functional genomics, transcriptomics, proteomics and genetics data as well as biochemical characterizations. The seventh sheet contains a list of research articles utilized to reconstruct the PCWDN. The eighth sheet contains information on the structural units comprising the backbone and side chains of different plant cell wall polysaccharides such as cellulose, xylan, xyloglucan, mannan, galactomannan, glucomannan, galactoglucomannan, mixed-linkage glucan, homogalacturonan, xylogalacturonan, rhamnogalacturonan I, amylose and amylopectin. NoC no carbon, CB cellobiose, XG xyloglucan, MLG mixed-linkage glucan, OPP orange peel powder. [file 13068_2017_901_MOESM1_ESM.xlsx]

## Sheet: Introduction
Additional File 1: List of reactions, compounds and genes in the plant cell wall degradation network (PCWDN) of N. crassa. The first, second and third sheets contain the list of reactions, genes and compounds, respectively, in the PCWDN. The fourth sheet gives the participation of the PCWDN genes in the cellulose, hemicellulose, pectin and starch degradation pathways. The fifth and sixth sheets c…

## Sheet: Reactions
Reaction Name	Equation	Subsystem	EC	Gene Association	References	Notes
Extracellular Reactions
endo-b-1,4-glucanase	cellulose[e] + h2o[e] --> beta14glucan_cut_reducing_nonreducing[e]	Cellulose	3.2.1.4	NCU00762; NCU04027; NCU04854; NCU05057; NCU05121; NCU05955; NCU09764
lytic polysaccharide monooxygenase 1 or 3	cellulose[e] + o2[e] + fadh2[e] --> beta14glucan_cut_lactone_nonreducing[e] + fad[e] + h2o[e]	Cellulose		NCU00836; NCU01867; NCU02344; NCU03328; NCU08760; NCU09764; NCU03000; NCU05969; NCU07520; NCU07760; NCU07898; NCU07974	21821740 21876164 22004347 22188218 22578542
lytic polysaccharide monooxygenase 2 or 3	cellulose[e] + o2[e] + fadh2[e] --> beta14glucan_cut_reducing_ketoaldose[e] + fad[e] + h2o[e]	Cellulose		NCU01050; NCU02240; NUC02916; NCU03000; NCU05969; NCU07520; NCU07760; NCU07898	21821740 21876164 22004347 22188218 22578542
exo-b-1,4-glucanase or cellobiohydrolase	beta14glucan_cut_reducing_nonreducing[e] + h2o[e] --> cellobiose[e] + cellotriose[e] + cellotetraose[e] + cellopentaose[e]	Cellulose, Hemicellulose	3.2.1.91	NCU03996; NCU05104; NCU07190; NCU07340; NCU09680
exo-b-1,4-glucanase or cellobiohydrolase	beta14glucan_cut_lactone_nonreducing[e] + h2o[e] --> cellobiose[e] + cellobiono-1,5-lactone[e]	Cellulose, Hemicellulose	3.2.1.91	NCU03996; NCU05104; NCU07190; NCU07340; NCU09680
exo-b-1,4-glucanase or cellobiohydrolase	beta14glucan_cut_reducing_ketoaldose[e] + h2o[e] --> cellobiose[e] + 4-ketocellobiose[e]	Cellulose, Hemicellulose	3.2.1.91	NCU03996; NCU05104; NCU07190; NCU07340; NCU09680
extracellular cellobiono-1,5-lactonase	cellobiono-1,5-lactone[e] + h2o[e] <--> cellobionic_acid[e]	Cellulose, Hemicellulose	3.1.1.17	NCU01866; NCU07143; NCU07703
cellobiose dehydrogenase	cellobiose[e] + fad[e] <--> cellobiono-1,5-lactone[e] + fadh2[e]	Cellulose, Hemicellulose	1.1.99.18	NCU00206; NCU05923
extracellular b-glucosidase	cellobiose[e] + h2o[e] --> 2 beta-D-glucose[e]	Cellulose, Hemicellulose	3.2.1.21	NCU03641; NCU04952; NCU08755
extracellular b-glucosidase	cellotriose[e] + 2 h2o[e] --> 3 beta-D-glucose[e]	Cellulose, Hemicellulose	3.2.1.21	NCU03641; NCU04952; NCU08755
extracellular b-glucosidase	cellotetraose[e] + 3 h2o[e] --> 4 beta-D-glucose[e]	Cellulose, Hemicellulose	3.2.1.21	NCU03641; NCU04952; NCU08755
extracellular b-glucosidase	cellopentaose[e] + 4 h2o[e] --> 5 beta-D-glucose[e]	Cellulose, Hemicellulose	3.2.1.21	NCU03641; NCU04952; NCU08755
extracellular b-glucosidase	cellobionic_acid[e] + h2o[e] --> beta-D-glucose[e] + D-gluconate[e]	Cellulose, Hemicellulose	3.2.1.21	NCU03641; NCU04952; NCU08755	22546481
extracellular b-glucosidase	4-ketocellobiose[e] + h2o[e] --> beta-D-glucose[e] + 4-keto-D-glucose[e]	Cellulose, Hemicellulose	3.2.1.21	NCU03641; NCU04952; NCU08755
extracellular D-glucono-1,5-lactonase	D-glucono-1,5-lactone[e] + h2o[e] <--> D-gluconate[e]	Cellulose, Hemicellulose	3.1.1.17	NCU01866; NCU07143; NCU07703
hemicellulose composition	hemicellulose[e] --> xylan[e] + galactomannan[e] + mannan[e] + glucomannan[e] + xyloglucan[e] + mixed_linkage_glucan[e]	Hemicellulose
endo-b-1,4-xylanase	xylan[e] + h2o[e] --> xylobiose[e] + xylotriose[e] + xylotetraose[e] + xylopentaose[e]	Hemicellulose	3.2.1.8	NCU02855; NCU04997; NCU05924; NCU07130; NCU07225; NCU08189
a-arabinofuranosidase	xylan[e] + h2o[e] --> xylan[e] + L-arabinose[e]	Hemicellulose	3.2.1.55	NCU02343; NCU07326; NCU09170; NCU09775
a-glucuronidase	xylan[e] + h2o[e] --> xylan[e] + D-glucuronate[e]	Hemicellulose	3.2.1.139	NCU06143; NCU07351
a-galactosidase	xylan[e] + h2o[e] --> xylan[e] + D-galactose[e]	Hemicellulose	3.2.1.22	NCU02550
extracellular b-galactosidase	xylan[e] + h2o[e] --> xylan[e] + D-galactose[e]	Hemicellulose	3.2.1.23	NCU00642; NCU04623
feruloyl esterase	xylan[e] + h2o[e] --> xylan[e] + ferulate[e]	Hemicellulose	3.1.1.73	NCU08785; NCU09026; NCU09491; NCU09774
acetyl esterase	xylan[e] + h2o[e] --> xylan[e] + acetate[e]	Hemicellulose	3.1.1.72	NCU00710; NCU03181; NCU04494; NCU04870; NCU05159; NCU09663; NCU09664
extracellular b-xylosidase	xylobiose[e] + h2o[e] --> 2 D-xylose[e]	Hemicellulose	3.2.1.72	NCU00709; NCU09923
extracellular b-xylosidase	xylotriose[e] + 2 h2o[e] --> 3 D-xylose[e]	Hemicellulose	3.2.1.72	NCU00709; NCU09923
extracellular b-xylosidase	xylotetraose[e] + 3 h2o[e] --> 4 D-xylose[e]	Hemicellulose	3.2.1.72	NCU00709; NCU09923
extracellular b-xylosidase	xylopentaose[e] + 4 h2o[e] --> 5 D-xylose[e]	Hemicellulose	3.2.1.72	NCU00709; NCU09923
a-galactosidase	galactomannan[e] + h2o[e] --> mannan[e] + D-galactose[e]	Hemicellulose	3.2.1.22	NCU02550
extracellular b-galactosidase	galactomannan[e] + h2o[e] --> mannan[e] + D-galactose[e]	Hemicellulose	3.2.1.23	NCU00642; NCU04623
acetyl mannan esterase	galactomannan[e] + h2o[e] --> galactomannan[e] + acetate[e]	Hemicellulose		NCU09416
endo-b-1,4-mannanase	mannan[e] + h2o[e] --> mannobiose[e] + mannotriose[e] + mannotetraose[e] + mannopentaose[e]	Hemicellulose	3.2.1.78	NCU08412
extracellular b-mannosidase	mannobiose[e] + h2o[e] --> 2 D-mannose[e]	Hemicellulose	3.2.1.25	NCU00985		We hypothesize NCU00985 as the candidate extracellular b-mannosidase in Neurospora crassa.
extracellular b-mannosidase	mannotriose[e] + 2 h2o[e] --> 3 D-mannose[e]	Hemicellulose	3.2.1.25	NCU00985
extracellular b-mannosidase	mannotetraose[e] + 3 h2o[e] --> 4 D-mannose[e]	Hemicellulose	3.2.1.25	NCU00985
extracellular b-mannosidase	mannopentaose[e] + 4 h2o[e] --> 5 D-mannose[e]	Hemicellulose	3.2.1.25	NCU00985
a-galactosidase	glucomannan[e] + h2o[e] --> glucomannan[e] + D-galactose[e]	Hemicellulose	3.2.1.22	NCU02550
extracellular b-galactosidase	glucomannan[e] + h2o[e] --> glucomannan[e] + D-galactose[e]	Hemicellulose	3.2.1.23	NCU00642; NCU04623
acetyl mannan esterase	glucomannan[e] + h2o[e] --> glucomannan[e] + acetate[e]	Hemicellulose		NCU09416
endo-b-1,4-mannanase	glucomannan[e] + h2o[e] --> mannobiose[e] + mannotriose[e] + 4-O-beta-D-Mannopyranosyl-D-glucose[e]	Hemicellulose	3.2.1.78	NCU08412
extracellular b-glucosidase	4-O-beta-D-Mannopyranosyl-D-glucose[e] + h2o[e] --> D-mannose[e] + beta-D-glucose[e]	Hemicellulose	3.2.1.21	NCU03641; NCU04952; NCU08755
endo-b-1,4-glucanase	xyloglucan[e] + h2o[e] --> beta14glucan_cut_reducing_nonreducing[e]	Hemicellulose	3.2.1.151	NCU00762; NCU04027; NCU04854; NCU05057; NCU05121; NCU05955; NCU09764
lytic polysaccharide monooxygenase 1 or 3	xyloglucan[e] + o2[e] + fadh2[e] --> beta14glucan_cut_lactone_nonreducing[e] + fad[e] + h2o[e]	Hemicellulose		NCU00836; NCU01867; NCU02344; NCU03328; NCU08760; NCU09764; NCU03000; NCU05969; NCU07520; NCU07760; NCU07898; NCU07974	24733907
lytic polysaccharide monooxygenase 2 or 3	xyloglucan[e] + o2[e] + fadh2[e] --> beta14glucan_cut_reducing_ketoaldose[e] + fad[e] + h2o[e]	Hemicellulose		NCU01050; NCU02240; NUC02916; NCU03000; NCU05969; NCU07520; NCU07760; NCU07898	24733907
a-xylosidase	xyloglucan[e] + h2o[e] --> xyloglucan[e] + D-xylose[e]	Hemicellulose	3.2.1.177	NCU04885
a-arabinofuranosidase	xyloglucan[e] + h2o[e] --> xyloglucan[e] + L-arabinose[e]	Hemicellulose	3.2.1.55	NCU02343; NCU07326; NCU09170; NCU09775
a-fucosidase	xyloglucan[e] + h2o[e] --> xyloglucan[e] + L-fucose[e]	Hemicellulose	3.2.1.51			Neurospora crassa does not contain any genes in the CAZY classes GH29 and GH95.
a-galactosidase	xyloglucan[e] + h2o[e] --> xyloglucan[e] + D-galactose[e]	Hemicellulose	3.2.1.22	NCU02550
extracellular b-galactosidase	xyloglucan[e] + h2o[e] --> xyloglucan[e] + D-galactose[e]	Hemicellulose	3.2.1.23	NCU00642; NCU04623
endo-b-1,3-glucanase	mixed_linkage_glucan[e] + h2o[e] --> beta1314glucan_cut_reducing_nonreducing[e]	Hemicellulose	3.2.1.39	NCU06381; NCU07347; NCU09175
endo-b-1,4-glucanase	mixed_linkage_glucan[e] + h2o[e] --> beta1314glucan_cut_reducing_nonreducing[e]	Hemicellulose	3.2.1.4	NCU00762; NCU04027; NCU04854; NCU05057; NCU05121; NCU05955; NCU09764
lytic polysaccharide monooxygenase 1 or 3	mixed_linkage_glucan[e] + o2[e] + fadh2[e] --> beta1314glucan_cut_lactone_nonreducing[e] + fad[e] + h2o[e]	Hemicellulose		NCU00836; NCU01867; NCU02344; NCU03328; NCU08760; NCU09764; NCU03000; NCU05969; NCU07520; NCU07760; NCU07898; NCU07974	21821740 21876164 22004347 22188218 22578542
lytic polysaccharide monooxygenase 2 or 3	mixed_linkage_glucan[e] + o2[e] + fadh2[e] --> beta1314glucan_cut_reducing_ketoaldose[e] + fad[e] + h2o[e]	Hemicellulose		NCU01050; NCU02240; NUC02916; NCU03000; NCU05969; NCU07520; NCU07760; NCU07898	21821740 21876164 22004347 22188218 22578542
exo-b-1,3-glucanase	beta1314glucan_cut_reducing_nonreducing[e] + h2o[e] --> beta14glucan_cut_reducing_nonreducing[e] + beta-D-glucose[e] + cellobiose[e]	Hemicellulose	3.2.1.39	NCU03914; NCU09326; NCU09764
exo-b-1,3-glucanase	beta1314glucan_cut_lactone_nonreducing[e] + h2o[e] --> beta14glucan_cut_lactone_nonreducing[e] + beta-D-glucose[e] + cellobiose[e]	Hemicellulose	3.2.1.39	NCU03914; NCU09326; NCU09764
exo-b-1,3-glucanase	beta1314glucan_cut_reducing_ketoaldose[e] + h2o[e] --> beta14glucan_cut_reducing_ketoaldose[e] + beta-D-glucose[e] + cellobiose[e]	Hemicellulose	3.2.1.39	NCU03914; NCU09326; NCU09764
pectin composition	pectin[e] --> homogalacturonan[e] + xylogalacturonan[e] + rhamnogalacturonan[e]	Pectin
endogalacturonase	homogalacturonan[e] + h2o[e] --> galacturonan_oligosaccharide[e]	Pectin	3.2.1.15	NCU02369
exogalacturonase	galacturonan_oligosaccharide[e] + h2o[e] --> D-galacturonate[e]	Pectin	3.2.1.67	NCU06961
pectate lyase	homogalacturonan[e] --> unsaturated_digalacturonate[e]	Pectin	4.2.2.2	NCU06326; NCU08176		Chemical name of unsaturated_digalacturonate is 4-(4-Deoxy-alpha-D-gluc-4-enuronosyl)-D-galacturonate or 4-(4-Deoxy-alpha-D-galact-4-enuronosyl)-D-galacturonate.
pectin lyase	homogalacturonan[e] --> (4-deoxy-6-O-methyl-alpha-D-galact-4-enuronosyl)-D-galacturonate[e]	Pectin	4.2.2.10
pectin methyl esterase	(4-deoxy-6-O-methyl-alpha-D-galact-4-enuronosyl)-D-galacturonate[e] + h2o[e] --> unsaturated_digalacturonate[e] + methanol[e]	Pectin	3.1.1.11	NCU10045
feruloyl esterase	homogalacturonan[e] + h2o[e] --> homogalacturonan[e] + ferulate[e]	Pectin	3.1.1.73	NCU08785; NCU09026; NCU09491; NCU09774
acetyl esterase	homogalacturonan[e] + h2o[e] --> homogalacturonan[e] + acetate[e]	Pectin	3.1.1.72	NCU00710; NCU03181; NCU04494; NCU04870; NCU05159; NCU09663; NCU09664
endogalacturonase	xylogalacturonan[e] + h2o[e] --> xylogalacturonan_oligosaccharide[e]	Pectin	3.2.1.15	NCU02369
exogalacturonase	xylogalacturonan_oligosaccharide[e] + h2o[e] --> beta-1,3-D-xylosyl-D-galacturonate[e] + D-galacturonate[e]	Pectin	3.2.1.67	NCU06961
pectate lyase	xylogalacturonan[e] --> unsaturated_digalacturonate[e]	Pectin	4.2.2.2	NCU06326; NCU08176		Chemical name of unsaturated_digalacturonate is 4-(4-Deoxy-alpha-D-gluc-4-enuronosyl)-D-galacturonate or 4-(4-Deoxy-alpha-D-galact-4-enuronosyl)-D-galacturonate.
pectin lyase	xylogalacturonan[e] --> (4-deoxy-6-O-methyl-alpha-D-galact-4-enuronosyl)-D-galacturonate[e]	Pectin	4.2.2.10
feruloyl esterase	xylogalacturonan[e] + h2o[e] --> xylogalacturonan[e] + ferulate[e]	Pectin	3.1.1.73	NCU08785; NCU09026; NCU09491; NCU09774
acetyl esterase	xylogalacturonan[e] + h2o[e] --> xylogalacturonan[e] + acetate[e]	Pectin	3.1.1.72	NCU00710; NCU03181; NCU04494; NCU04870; NCU05159; NCU09663; NCU09664
extracellular b-xylosidase	beta-1,3-D-xylosyl-D-galacturonate[e] + h2o[e] --> D-xylose[e] + D-galacturonate[e]	Pectin	3.2.1.72	NCU00709; NCU09923
endogalacturonase	rhamnogalacturonan[e] + h2o[e] --> rhamnogalacturonan_oligosaccharide[e]	Pectin	3.2.1.15	NCU02369
exogalacturonase	rhamnogalacturonan_oligosaccharide[e] + h2o[e] --> D-galacturonate[e] + L-rhamnose[e]	Pectin	3.2.1.67	NCU06961
rhamnogalacturonan lyase	rhamnogalacturonan[e] --> (4-deoxy-4,5-unsaturated-D-galactopyranosyluronate)-L-rhamnose[e]	Pectin	4.2.2.23	NCU05598
endo-b-1,4-galactanase	rhamnogalacturonan[e] + h2o[e] --> rhamnogalacturonan[e] + arabinogalactan[e]	Pectin	3.2.1.89	NCU00972
endo-b-1,6-galactanase	rhamnogalacturonan[e] + h2o[e] --> rhamnogalacturonan[e] + arabinogalactan[e]	Pectin	3.2.1.164	NCU05882; NCU09702
a-arabinofuranosidase	arabinogalactan[e] + h2o[e] --> galactan[e] + L-arabinose[e]	Pectin	3.2.1.55	NCU02343; NCU07326; NCU09170; NCU09775
endo-b-1,4-galactanase	galactan[e] + h2o[e] --> galactobiose[e] + galactotriose[e] + galactotetraose[e] + galactopentaose[e]	Pectin	3.2.1.89	NCU00972
extracellular b-galactosidase	galactobiose[e] + h2o[e] --> 2 D-galactose[e]	Pectin	3.2.1.23	NCU00642; NCU04623
extracellular b-galactosidase	galactotriose[e] + 2 h2o[e] --> 3 D-galactose[e]	Pectin	3.2.1.23	NCU00642; NCU04623
extracellular b-galactosidase	galactotetraose[e] + 3 h2o[e] --> 4 D-galactose[e]	Pectin	3.2.1.23	NCU00642; NCU04623
extracellular b-galactosidase	galactopentaose[e] + 4 h2o[e] --> 5 D-galactose[e]	Pectin	3.2.1.23	NCU00642; NCU04623
endoarabinanase	rhamnogalacturonan[e] + h2o[e] --> rhamnogalacturonan[e] + arabinan[e]	Pectin	3.2.1.99	NCU00852; NCU05965
exoarabinanase	arabinan[e] + h2o[e] --> L-arabinose[e]	Pectin	3.2.1.55	NCU09924
a-arabinofuranosidase	arabinan[e] + h2o[e] --> L-arabinose[e]	Pectin	3.2.1.55	NCU02343; NCU07326; NCU09170; NCU09775
extracellular b-glucuronidase	rhamnogalacturonan[e] + h2o[e] --> rhamnogalacturonan[e] + D-glucuronate[e]	Pectin	3.2.1.31	NCU00937; NCU08179
rhamnogalacturonan acetyl esterase	rhamnogalacturonan[e] + h2o[e] --> rhamnogalacturonan[e] + acetate[e]	Pectin	3.1.1.86	NCU09976
feruloyl esterase	rhamnogalacturonan[e] + h2o[e] --> rhamnogalacturonan[e] + ferulate[e]	Pectin	3.1.1.73	NCU08775; NCU09026; NCU09491; NCU09774
starch composition	starch[e] --> amylose[e] + amylopectin[e]	Starch
amylo-a-1,6-glucosidase	amylopectin[e] + h2o[e] --> alpha14glucan[e]	Starch	3.2.1.33	NCU00743		This enzyme is also known as debranching enzyme.
a-amylase	alpha14glucan[e] + h2o[e] --> maltose[e] + maltotriose[e] + maltotetraose[e] + maltopentaose[e]	Starch	3.2.1.1	NCU02478; NCU05429; NCU05873; NCU08131; NCU08132; NCU09486; NCU09805
a-amylase	amylose[e] + h2o[e] --> maltose[e] + maltotriose[e] + maltotetraose[e] + maltopentaose[e]	Starch	3.2.1.1	NCU02478; NCU05429; NCU05873; NCU08131; NCU08132; NCU09486; NCU09805
starch-active lytic polysaccharide monooxygenase	alpha14glucan[e] + o2[e] + fadh2[e] --> alpha14glucan_cut_lactone_nonreducing[e] + fad[e] + h2o[e]	Starch		NCU08746	25201969
starch lytic polysaccharide monooxygenase	amylose[e] + o2[e] + fadh2[e] --> alpha14glucan_cut_lactone_nonreducing[e] + fad[e] + h2o[e]	Starch		NCU08746	25201969
a-amylase	alpha14glucan_cut_lactone_nonreducing[e] + h2o[e] --> maltose[e] + maltobiono-1,5-lactone[e]	Starch		NCU02478; NCU05429; NCU05873; NCU08131; NCU08132; NCU09486; NCU09805
extracellular lactonase	maltobiono-1,5-lactone[e] + h2o[e] <--> maltobionic_acid[e]	Starch	3.1.1.17	NCU01866; NCU07143; NCU07703
extracellular a-glucosidase	maltose[e] + h2o[e] --> 2 alpha-D-glucose[e]	Starch	3.2.1.3	NCU01517; NCU02583; NCU03098; NCU04203; NCU04674; NCU09281
extracellular a-glucosidase	maltotriose[e] + 2 h2o[e] --> 3 alpha-D-glucose[e]	Starch	3.2.1.3	NCU01517; NCU02583; NCU03098; NCU04203; NCU04674; NCU09281
extracellular a-glucosidase	maltotetraose[e] + 3 h2o[e] --> 4 alpha-D-glucose[e]	Starch	3.2.1.3	NCU01517; NCU02583; NCU03098; NCU04203; NCU04674; NCU09281
extracellular a-glucosidase	maltopentaose[e] + 4 h2o[e] --> 5 alpha-D-glucose[e]	Starch	3.2.1.3	NCU01517; NCU02583; NCU03098; NCU04203; NCU04674; NCU09281
extracellular a-glucosidase	maltobionic_acid[e] + h2o[e] --> alpha-D-glucose[e] + D-gluconate[e]	Starch	3.2.1.3	NCU01517; NCU02583; NCU03098; NCU04203; NCU04674; NCU09281
extracellular aldose 1-epimerase	alpha-D-glucose[e] <--> beta-D-glucose[e]	Starch	5.1.3.3	NCU08398; NCU08516
Transport Reactions
cellodextrin transport	cellobiose[e] + h[e] <--> cellobiose[c] + h[c]	Cellulose, Hemicellulose		NCU00801; NCU00809; NCU08114
cellodextrin transport	cellotriose[e] + h[e] <--> cellotriose[c] + h[c]	Cellulose, Hemicellulose		NCU00801; NCU08114
cellodextrin transport	cellotetraose[e] + h[e] <--> cellotetraose[c] + h[c]	Cellulose, Hemicellulose		NCU00801
cellodextrin transport	cellopentaose[e] + h[e] <--> cellopentaose[c] + h[c]	Cellulose, Hemicellulose		NCU00801
cellobionic acid transport	cellobionic_acid[e] + h[e] <--> cellobionic_acid[c] + h[c]	Cellulose, Hemicellulose		NCU05853
b-D-glucose transport	beta-D-glucose[e] + h[e] <--> beta-D-glucose[c] + h[c]	Cellulose, Hemicellulose, Starch		NCU01633; NCU04963; NCU06138; NCU10021
gluconic acid transport	D-gluconate[e] + h[e] <--> D-gluconate[c] + h[c]	Cellulose, Hemicellulose
arabinose transport	L-arabinose[e] + h[e] <--> L-arabinose[c] + h[c]	Hemicellulose, Pectin		NCU01132; NCU02188
glucuronate transport	D-glucuronate[e] + h[e] <--> D-glucuronate[c] + h[c]	Hemicellulose, Pectin		NCU00988
galactose transport	D-galactose[e] + h[e] <--> D-galactose[c] + h[c]	Hemicellulose, Pectin
acetate transport	acetate[e] + h[e] <--> acetate[c] + h[c]	Hemicellulose, Pectin
xylodextrin transport	xylobiose[e] + h[e] <--> xylobiose[c] + h[c]	Hemicellulose		NCU08114	25647728	CDT-2 can transport up to X4.
xylodextrin transport	xylotriose[e] + h[e] <--> xylotriose[c] + h[c]	Hemicellulose		NCU08114	25647728	CDT-2 can transport up to X4.
xylodextrin transport	xylotetraose[e] + h[e] <--> xylotetraose[c] + h[c]	Hemicellulose		NCU08114	25647728	CDT-2 can transport up to X4.
xylodextrin transport	xylopentaose[e] + h[e] <--> xylopentaose[c] + h[c]	Hemicellulose
xylose transport	D-xylose[e] + h[e] <--> D-xylose[c] + h[c]	Hemicellulose, Pectin		NCU00821; NCU01132; NCU04963; NCU05627; NCU06138; NCU09287
mannodextrin transport	mannobiose[e] + h[e] <--> mannobiose[c] + h[c]	Hemicellulose
mannodextrin transport	mannotriose[e] + h[e] <--> mannotriose[c] + h[c]	Hemicellulose				Metabolomics dataset has detected intracellular mannotriose under three conditions.
mannodextrin transport	mannotetraose[e] + h[e] <--> mannotetraose[c] + h[c]	Hemicellulose
mannodextrin transport	mannopentaose[e] + h[e] <--> mannopentaose[c] + h[c]	Hemicellulose
mannose transport	D-mannose[e] + h[e] <--> D-mannose[c] + h[c]	Hemicellulose
fucose transport	L-fucose[e] + h[e] <--> L-fucose[c] + h[c]	Hemicellulose		NCU05897
galacturonate transport	D-galacturonate[e] + h[e] <--> D-galacturonate[c] + h[c]	Pectin		NCU00988
unsaturated digalacturonate transport	unsaturated_digalacturonate[e] + h[e] <--> unsaturated_digalacturonate[c] + h[c]	Pectin
rhamnose transport	L-rhamnose[e] + h[e] <--> L-rhamnose[c] + h[c]	Pectin
unsaturated galacturonate rhamnose dimer transport	(4-deoxy-4,5-unsaturated-D-galactopyranosyluronate)-L-rhamnose[e] + h[e] <--> (4-deoxy-4,5-unsaturated-D-galactopyranosyluronate)-L-rhamnose[c] + h[c]	Pectin
galactodextrin transport	galactobiose[e] + h[e] <--> galactobiose[c] + h[c]	Pectin
galactodextrin transport	galactotriose[e] + h[e] <--> galactotriose[c] + h[c]	Pectin
galactodextrin transport	galactotetraose[e] + h[e] <--> galactotetraose[c] + h[c]	Pectin
galactodextrin transport	galactopentaose[e] + h[e] <--> galactopentaose[c] + h[c]	Pectin
maltodextrin transport	maltose[e] <--> maltose[c]	Strach		NCU01868; NCU06522; NCU12154
maltodextrin transport	maltotriose[e] <--> maltotriose[c]	Strach		NCU01868; NCU06522; NCU12154
maltodextrin transport	maltotetraose[e] <--> maltotetraose[c]	Strach		NCU01868; NCU06522; NCU12154
maltodextrin transport	maltopentaose[e] <--> maltopentaose[c]	Strach		NCU01868; NCU06522; NCU12154
a-D-glucose transport	alpha-D-glucose[e] + h[e] <--> alpha-D-glucose[c] + h[c]	Starch		NCU01633; NCU04963; NCU06138; NCU10021
Internal Reactions
intracellular b-glucosidase	cellobiose[c] + h2o[c] --> 2 beta-D-glucose[c]	Cellulose, Hemicellulose	3.2.1.21	NCU00130; NCU05577; NCU07487; NCU08054
intracellular b-glucosidase	cellotriose[c] + 2 h2o[c] --> 3 beta-D-glucose[c]	Cellulose, Hemicellulose	3.2.1.21	NCU00130; NCU05577; NCU07487; NCU08054
intracellular b-glucosidase	cellotetraose[c] + 3 h2o[c] --> 4 beta-D-glucose[c]	Cellulose, Hemicellulose	3.2.1.21	NCU00130; NCU05577; NCU07487; NCU08054
intracellular b-glucosidase	cellopentaose[c] + 4 h2o[c] --> 5 beta-D-glucose[c]	Cellulose, Hemicellulose	3.2.1.21	NCU00130; NCU05577; NCU07487; NCU08054
intracellular b-glucosidase	cellobionic_acid[c] + h2o[c] --> beta-D-glucose[c] + D-gluconate[c]	Cellulose, Hemicellulose	3.2.1.21	NCU00130; NCU05577; NCU07487; NCU08054	22546481
cellobiose phosphorylase	cellobiose[c] + pi[c] <--> D-glucose-1-phosphate[c] + beta-D-glucose[c]	Cellulose, Hemicellulose	2.4.1.20	NCU09425
cellobiose phosphorylase	cellobionic_acid[c] + pi[c] <--> D-glucose-1-phosphate[c] + D-gluconate[c]	Cellulose, Hemicellulose	2.4.1.20	NCU09425
phosphoglucomutase	D-glucose-1-phosphate[c] <--> D-glucose-6-phosphate[c]	Cellulose, Hemicellulose	5.4.2.2	NCU10058
glucokinase	beta-D-glucose[c] + atp[c] --> D-glucose-6-phosphate[c] + adp[c]	Cellulose, Hemicellulose	2.7.1.1	NCU00575; NCU02542; NCU04728; NCU06996; NCU07626
glucose 1-dehydrogenase	beta-D-glucose[c] + nad[c] <--> D-glucono-1,5-lactone[c] + nadh[c] + h[c]	Cellulose, Hemicellulose, Starch	1.1.1.47
D-glucono-1,5-lactonase	D-glucono-1,5-lactone[c] + h2o[c] <--> D-gluconate[c]	Cellulose, Hemicellulose, Starch	3.1.1.17
D-gluconate dehydratase	D-gluconate[c] --> 2-keto-3-deoxy-D-gluconate[c] + h2o[c]	Cellulose, Hemicellulose, Starch	4.2.1.39
2-keto-3-deoxy-D-gluconate aldolase	2-keto-3-deoxy-D-gluconate[c] --> D-glyceraldehyde[c] + pyruvate[c]	Cellulose, Hemicellulose, Starch	4.1.2.20
D-glyceraldehyde reductase	D-glyceraldehyde[c] +nadph[c] + h[c] --> glycerol[c] + nadp[c]	Cellulose, Hemicellulose, Starch	1.1.1.72	NCU04923	16930134 18768163
intracellular b-xylosidase	xylobiose[c] + h2o[c] --> 2 D-xylose[c]	Hemicellulose	3.2.1.72	NCU01900; NCU09652
intracellular b-xylosidase	xylotriose[c] + 2 h2o[c] --> 3 D-xylose[c]	Hemicellulose	3.2.1.72	NCU01900; NCU09652
intracellular b-xylosidase	xylotetraose[c] + 3 h2o[c] --> 4 D-xylose[c]	Hemicellulose	3.2.1.72	NCU01900; NCU09652
intracellular b-xylosidase	xylopentaose[c] + 4 h2o[c] --> 5 D-xylose[c]	Hemicellulose	3.2.1.72	NCU01900; NCU09652
D-xylose reductase	D-xylose[c] + nadph[c] + h[c] <--> xylitol[c] + nadp[c]	Hemicellulose	1.1.1.307	NCU08384
xylitol dehydrogenase	xylitol[c] + nad[c] <--> D-xylulose[c] + nadh[c] + h[c]	Hemicellulose, Pectin	1.1.1.9	NCU00891
xylulokinase	D-xylulose[c] + atp[c] --> D-xylulose-5-phosphate[c] + adp[c]	Hemicellulose, Pectin	2.7.1.17	NCU11353
ribulose-phosphate 3-epimerase	D-xylulose-5-phosphate[c] <--> D-ribulose-5-phosphate[c]	Hemicellulose, Pectin	5.1.3.1	NCU00519
L-arabinose reductase	L-arabinose[c] + nadph[c] + h[c] <--> L-arabitol[c] + nadp[c]	Hemicellulose, Pectin	1.1.1.307	NCU08384
L-arabitol dehydrogenase	L-arabitol[c] + nad[c] <--> L-xylulose[c] + nadh[c] + h[c]	Hemicellulose, Pectin	1.1.1.12	NCU00643
L-xylulose reductase	L-xylulose[c] + nadph[c] + h[c] <--> xylitol[c] + nadp[c]	Hemicellulose, Pectin	1.1.1.10	NCU09041
D-glucuronate reductase	D-glucuronate[c] + nadph[c] + h[c] --> L-gulonate[c] + nadp[c]	Hemicellulose, Pectin	1.1.1.19
L-gulonate dehydrogenase	L-gulonate[c] + nad[c] --> 3-keto-L-gulonate[c] + nadh[c] +h[c]	Hemicellulose, Pectin	1.1.1.45
β-keto-L-gulonic acid decarboxylase	3-keto-L-gulonate[c] + h[c] --> L-xylulose[c] + co2[c]	Hemicellulose, Pectin	4.1.1.34
intracellular beta-mannosidase	mannobiose[c] + h2o[c] --> 2 D-mannose[c]	Hemicellulose	3.2.1.25	NCU00890
intracellular b-mannosidase	mannotriose[c] + 2 h2o[c] --> 3 D-mannose[c]	Hemicellulose	3.2.1.25	NCU00890
intracellular b-mannosidase	mannotetraose[c] + 3 h2o[c] --> 4 D-mannose[c]	Hemicellulose	3.2.1.25	NCU00890
intracellular b-mannosidase	mannopentaose[c] + 4 h2o[c] --> 5 D-mannose[c]	Hemicellulose	3.2.1.25	NCU00890
hexokinase	D-mannose[c] + atp[c] --> D-mannose-6-phosphate[c] + adp[c]	Hemicellulose	2.7.1.1	NCU00575; NCU02542; NCU04728; NCU06996
mannose-6-phosphate isomerase	D-mannose-6-phosphate[c] <--> D-fructose-6-phosphate[c]	Hemicellulose	5.3.1.8	NCU02322; NCU07165
D-galactose reductase	D-galactose[c] + nadph[c] + h[c] <--> galactitol[c] + nadp[c]	Hemicellulose, Pectin	1.1.1.307	NCU08384
galactitol dehydrogenase	galactitol[c] + nad[c] <--> L-xylo-3-hexulose[c] + nadh[c] + h[c]	Hemicellulose, Pectin	1.1.1.12	NCU00643
L-sorbitol reductase	L-xylo-3-hexulose[c] + nadph[c] + h[c] <--> D-sorbitol[c] + nadp[c]	Hemicellulose, Pectin	1.1.1.10	NCU09041
D-sorbitol dehydrogenase	D-sorbitol[c] + nad[c] <--> D-fructose[c] + nadh[c] + h[c]	Hemicellulose, Pectin	1.1.1.9	NCU00891
fructokinase	D-fructose[c] + atp[c] --> D-fructose-6-phosphate[c] + adp[c]	Hemicellulose, Pectin	2.7.1.1	NCU00575; NCU02542; NCU04728; NCU06996; NCU07626
intracellular aldose 1-epimerase	D-galactose[c] <--> alpha-D-galactose[c]	Hemicellulose, Pectin	5.1.3.3	NCU04442; NCU08030; NCU09705
galactokinase	alpha-D-galactose[c] + atp[c] --> alpha-D-galactose-1-phosphate[c] + adp[c]	Hemicellulose, Pectin	2.7.1.6	NCU08687
galactose-1-phosphate uridylyltransferase	alpha-D-galactose-1-phosphate[c] + UDP-D-glucose[c] --> UDP-D-galactose[c] + D-glucose-1-phosphate[c]	Hemicellulose, Pectin	2.7.7.12	NCU04460; NCU07072
unsaturated rhamnogalacturonyl hydrolase	unsaturated_digalacturonate[c] + h2o[c] --> unsaturated_galacturonate[c] + D-galacturonate[c]	Pectin	3.2.1.173	NCU02654	16781735	unsaturated galacturonate is 4-deoxy-L-threo-hex-4-enopyranuronate.
unsaturated rhamnogalacturonyl hydrolase	(4-deoxy-4,5-unsaturated-D-galactopyranosyluronate)-L-rhamnose[e] + h2o[e] --> unsaturated_galacturonate[c] + L-rhamnose[e]	Pectin	3.2.1.173	NCU02654
spontaneous conversion	unsaturated_galacturonate[c] --> 5-dehydro-4-deoxy-D-glucuronate[c]	Pectin				This reaction appears in alginite pathway.
D-galacturonate reductase	D-galacturonate[c] + nadph[c] + h[c] --> L-galactonate[c] + nadp[c]	Pectin	1.1.1.203	NCU01906; NCU09533	16101307 18768163 21388872
L-galactonate dehydratase	L-galactonate[c] --> 2-keto-3-deoxy-L-galactonate[c] + h2o[c]	Pectin	4.2.1.6	NCU07064	16879654 18768163
2-keto-3-deoxy-L-galactonate aldolase	2-keto-3-deoxy-L-galactonate[c] --> L-glyceraldehyde[c] + pyruvate[c]	Pectin	4.1.2.-	NCU05977; NCU09532	17609199 18768163 20796274
L-glyceraldehyde reductase	L-glyceraldehyde[c] + nadph[c] + h[c] <--> glycerol[c] + nadp[c]	Cellulose, Hemicellulose, Pectin	1.1.1.72	NCU04923	16930134 18768163
4-deoxy-L-erythro-5-hexoseulose uronate reductase	5-dehydro-4-deoxy-D-glucuronate[c] + nadh[c] + h[c] --> 2-keto-3-deoxy-D-gluconate[c] + nad[c]	Pectin		NCU01399	20685299 22267807	DELTA BLAST with characterized gene in Sphigomonas gives high similarity with NCU01399. This enzyme is also called unsaturated uronate reductase.
2-keto-3-deoxy-D-gluconate aldolase	2-keto-3-deoxy-D-gluconate[c] --> D-glyceraldehyde[c] + pyruvate[c]	Pectin	4.1.2.20		12824170
L-rhamnose 1-dehydrogenase	L-rhamnose[c] + nadp[c] <--> L-rhamnono-1,4-lactone[c] + nadph[c] + h[c]	Pectin	1.1.1.173	NCU09035	18400031 22037608
L-rhamnono-1,4-lactonase	L-rhamnono-1,4-lactone[c] + h2o[c] <--> L-rhamnonate[c]	Pectin	3.1.1.65	NCU03605	18505728 22037608 23214453
L-rhamnonate dehydratase	L-rhamnonate[c] --> 2-keto-3-deoxy-L-rhamnonate[c] + h2o[c]	Pectin	4.2.1.90	NCU09034	18505728 22037608
L-2-keto-3-deoxy-rhamnonate aldolase	2-keto-3-deoxy-L-rhamnonate[c] --> L-lactaldehyde[c] + pyruvate[c]	Pectin	4.1.2.-	NCU05037	18505728 22037608
lactaldehyde dehydrogenase	L-lactaldehyde[c] + nad[c] + h2o[c] <--> L-lactate[c] + nadh[c] + h[c]	Pectin	1.2.1.22	NCU00378; NCU00417	17202142 18793327 22037608
intracellular b-galactosidase	galactobiose[c] + h2o[c] --> 2 D-galactose[c]	Pectin	3.2.1.23	NCU00810; NCU05956
intracellular b-galactosidase	galactotriose[c] + 2 h2o[c] --> 3 D-galactose[c]	Pectin	3.2.1.23	NCU00810; NCU05956
intracellular b-galactosidase	galactotetraose[c] + 3 h2o[c] --> 4 D-galactose[c]	Pectin	3.2.1.23	NCU00810; NCU05956
intracellular b-galactosidase	galactopentaose[c] + 4 h2o[c] --> 5 D-galactose[c]	Pectin	3.2.1.23	NCU00810; NCU05956
intracellular a-glucosidase	maltose[c] + h2o[c] --> 2 alpha-D-glucose[c]	Starch	3.2.1.3	NCU06523; NCU07860
intracellular a-glucosidase	maltotriose[c] + 2 h2o[c] --> 3 alpha-D-glucose[c]	Starch	3.2.1.3	NCU06523; NCU07860
intracellular a-glucosidase	maltotetraose[c] + 3 h2o[c] --> 4 alpha-D-glucose[c]	Starch	3.2.1.3	NCU06523; NCU07860
intracellular a-glucosidase	maltopentaose[c] + 4 h2o[c] --> 5 alpha-D-glucose[c]	Starch	3.2.1.3	NCU06523; NCU07860
glucokinase	alpha-D-glucose[c] + atp[c] --> D-glucose-6-phosphate[c] + adp[c]	Starch	2.7.1.1	NCU00575; NCU02542; NCU04728; NCU06996; NCU07626
intracellular aldose 1-epimerase	alpha-D-glucose[c] <--> beta-D-glucose[c]	Starch	5.1.3.3	NCU04442; NCU08030; NCU09705

## Sheet: Genes
Gene	Name	Our Annotation	Subsystem	References	Notes
NCU00762	gh5-1	endo-b-1,4-glucanase	Cellulose, Hemicellulose	20018766 20826217 21744778 21980519 22345350 22474347 22532664
NCU04027	gh7-3	endo-b-1,4-glucanase	Cellulose, Hemicellulose	12712197 15007097
NCU04854	gh7-2	endo-b-1,4-glucanase	Cellulose, Hemicellulose	16844780 20018766 21980519 22474347 22532664
NCU05057	gh7-1	endo-b-1,4-glucanase	Cellulose, Hemicellulose	16844780 20018766 22345350 22474347 22532664
NCU05121	gh45-1	endo-b-1,4-glucanase	Cellulose, Hemicellulose	12591897 20018766 21980519 22474347 22532664
NCU05955	gh74-1	endo-b-1,4-glucanase	Cellulose, Hemicellulose	11916668 20018766	Although this gene is annotated as xyloglucan-active endo-b-1,4-glucanase, it is highly expressed only under Cellulose and MixedLinkageGlucan conditions.
NCU09764		endo-b-1,4-glucanase and exo-b-1,3/1,6-glucanase	Cellulose, Hemicellulose	22474347 22532664 22578542 23023747
NCU00836		lytic polysaccharide monooxygenase 1 (LPMO1)	Cellulose, Hemicellulose	20018766 22345350 22474347 22532664 22578542
NCU01867	NcLPMO9J	lytic polysaccharide monooxygenase 1 (LPMO1)	Cellulose, Hemicellulose	20018766 22578542 23102010
NCU02344		lytic polysaccharide monooxygenase 1 (LPMO1)	Cellulose, Hemicellulose	20018766 22474347 22532664 22578542
NCU03328	NcLPMO9F	lytic polysaccharide monooxygenase 1 (LPMO1)	Cellulose, Hemicellulose	20018766 21980519 22345350 22474347 22532664 22578542 23102010
NCU08760	NcLPMO9E	lytic polysaccharide monooxygenase 1 (LPMO1)	Cellulose, Hemicellulose	20018766 22004347 22188218 22345350 22474347 22532664 22578542 23102010
NCU03000		lytic polysaccharide monooxygenase 3 (LPMO3)	Cellulose, Hemicellulose	22578542
NCU05969		lytic polysaccharide monooxygenase 3 (LPMO3)	Cellulose, Hemicellulose	20018766 22578542
NCU07520		lytic polysaccharide monooxygenase 3 (LPMO3)	Cellulose, Hemicellulose	22578542
NCU07760		lytic polysaccharide monooxygenase 3 (LPMO3)	Cellulose, Hemicellulose	20018766 22474347 22532664
NCU07898	NcLPMO9M	lytic polysaccharide monooxygenase 3 (LPMO3)	Cellulose, Hemicellulose	20018766 21980519 22004347 22188218 22474347 22532664 22578542
NCU07974		lytic polysaccharide monooxygenase 3 (LPMO3)	Cellulose, Hemicellulose	22578542
NCU01050	NcLPMO9D	lytic polysaccharide monooxygenase 2 (LPMO2)	Cellulose, Hemicellulose	20018766 22004347 22188218 22345350 22474347 22532664 22578542
NCU02240		lytic polysaccharide monooxygenase 2 (LPMO2)	Cellulose, Hemicellulose	20018766 22345350 22474347 22532664 22578542
NCU02916	NcLPMO9C	lytic polysaccharide monooxygenase 2 (LPMO2)	Cellulose, Hemicellulose	20018766 22345350 22532664 22578542 22729546 23102010 24324265 24733907 26178376
NCU03996	gh6-1	exo-b-1,4-glucanase or cellobiohydrolase	Cellulose, Hemicellulose	12712197 16844780 15007097
NCU05104	gh7-4	exo-b-1,4-glucanase or cellobiohydrolase	Cellulose, Hemicellulose	20018766 22532664
NCU07190	gh6-3	exo-b-1,4-glucanase or cellobiohydrolase	Cellulose, Hemicellulose	20018766 21980519 22345350 22474347 22532664
NCU07340	cbh-1	exo-b-1,4-glucanase or cellobiohydrolase	Cellulose, Hemicellulose	12409103 16844780 20018766 21744778 21980519 22345350 22474347 22532664
NCU09680	gh6-2 or cbh-2	exo-b-1,4-glucanase or cellobiohydrolase	Cellulose, Hemicellulose	16844780 20018766 21744778 21980519 22345350 22474347 22532664
NCU01866		extracellular lactonase	Cellulose, Hemicellulose, Starch	12712197 15007097 15503009 22532664
NCU07143		extracellular lactonase	Cellulose, Hemicellulose, Starch	12712197 15007097
NCU07703		extracellular lactonase	Cellulose, Hemicellulose, Starch	12712197 15007097 21075873
NCU00206	cdh-1	cellobiose dehydrogenase	Cellulose, Hemicellulose	20018766 20709172 21980519 22004347 22474347 22532664
NCU05923	cdh-2	cellobiose dehydrogenase	Cellulose, Hemicellulose	20018766 20709172 21980519 22004347 22474347 22532664 22729546
NCU03641	gh3-1	extracellular b-glucosidase	Cellulose, Hemicellulose	10671536 21785931 23410930
NCU04952	gh3-4	extracellular b-glucosidase	Cellulose, Hemicellulose	1368541 21744778 21980519 22474347 22532664 23410930 26288653
NCU08755	gh3-3	extracellular b-glucosidase	Cellulose, Hemicellulose	10671536 17259976 20018766 22474347 22532664 23410930
NCU02855	gh11-1	endo-b-1,4-xylanase	Hemicellulose	8787417 16844780 20018766 22345350 22462823 22474347 22532664
NCU04997	gh10-3	endo-b-1,4-xylanase	Hemicellulose	8787417 16844780 22474347 22532664
NCU05924	gh10-1	endo-b-1,4-xylanase	Hemicellulose	8890913 16844780 20018766 22345350 22462823 22474347 22532664
NCU07130	gh10-4	endo-b-1,4-xylanase	Hemicellulose	8787417 16844780 12712197 15007097
NCU07225	gh11-2	endo-b-1,4-xylanase	Hemicellulose	8787417 16844780 20018766 22345350 22462823 22474347 22532664
NCU08189	gh10-2	endo-b-1,4-xylanase	Hemicellulose	8787417 16844780 20018766 22345350 22462823 22474347 22532664
NCU02343	gh51-1	a-arabinofuranosidase	Hemicellulose, Pectin	7764056 20018766 22345350 22462823 22474347 22532664 24224966
NCU07326	gh43-6	a-arabinofuranosidase	Hemicellulose, Pectin	21980519
NCU09170	gh43-4	a-arabinofuranosidase	Hemicellulose, Pectin	20018766 22345350 24224966
NCU09775	gh54-1	a-arabinofuranosidase	Hemicellulose, Pectin	7764056 16844780 20018766 20932514 22474347 22532664 24224966
NCU06143	gh115-1	a-glucuronidase	Hemicellulose	24224966
NCU07351	gh67-1	a-glucuronidase	Hemicellulose	16844780 22462823
NCU02550	gh36-1	a-galactosidase	Hemicellulose	24224966
NCU00642	gh35-1	extracellular b-galactosidase	Hemicellulose, Pectin	1368193 22345350 22532664 24224966
NCU04623	gh35-2	extracellular b-galactosidase	Hemicellulose, Pectin	1368193 22345350 22532664 24224966
NCU08785	ce1-3	feruloyl esterase	Hemicellulose, Pectin	16844780
NCU09026		feruloyl esterase	Hemicellulose, Pectin	12712197 15007097 17043824
NCU09491	fea-1	feruloyl esterase	Hemicellulose, Pectin	12435269 22345350 22532664 24224966
NCU09774	ce1-5	feruloyl esterase	Hemicellulose, Pectin	16844780
NCU00710	ce1-4	acetyl esterase	Hemicellulose, Pectin	9758775 16844780 20018766 22345350 22474347 22532664 24224966
NCU03181		acetyl esterase	Hemicellulose, Pectin	16844780 21980519 22532664 24224966
NCU04494	ce1-2	acetyl esterase	Hemicellulose, Pectin	12712197 15007097
NCU04870	ce1-1	acetyl esterase	Hemicellulose, Pectin	9758775 16844780 20018766 22462823 22532664 24224966
NCU05159	ce5-1	acetyl esterase	Hemicellulose, Pectin	8647098 20018766 22345350 22462823 22532664 24224966
NCU09663	ce5-2	acetyl esterase	Hemicellulose, Pectin	12712197 15007097
NCU09664	ce5-3	acetyl esterase	Hemicellulose, Pectin	8647098 21980519 22462823 22532664 24224966
NCU00709	gh3-8	extracellular b-xylosidase	Hemicellulose, Pectin	16844780 22532664 24224966
NCU09923	gh3-7	extracellular b-xylosidase	Hemicellulose, Pectin	16844780 20018766 22532664 24224966
NCU09416		acetyl mannan esterase	Hemicellulose
NCU08412	gh5-7	endo-b-1,4-mannanase	Hemicellulose	16844780 22532664 23766336 24224966	NCU08412 was previously annotated as NCU11068.
NCU00985	gh2-4	(probable) extracellular b-mannosidase	Hemicellulose		We hypothesize NCU00985 as the extracellular beta-mannosidase in Neurospora crassa.
NCU04885	gh31-4	a-xylosidase	Hemicellulose	12712197 15007097
NCU06381	gh17-1	endo-b-1,3-glucanase	Hemicellulose	12712197 15007097
NCU07347	gh17-2	endo-b-1,3-glucanase	Hemicellulose	12712197 16844780 15007097
NCU09175	gh17-3	endo-b-1,3-glucanase	Hemicellulose	12712197 15007097 19555771 22345350
NCU03914	gh5-4	exo-b-1,3-glucanase	Hemicellulose	16844780 19555771
NCU09326	gh17-4	exo-b-1,3-glucanase	Hemicellulose	12712197 15007097 19555771
NCU02369	gh28-1	endogalacturonase	Pectin	16844780 18431596 24224966
NCU06961	gh28-2	exogalacturonase	Pectin	10642523 18431596 19618506 24224966
NCU06326	pl1-1	pectate lyase	Pectin	12712197 15007097 16844780 24224966
NCU08176	pl3-1	pectate lyase	Pectin	12712197 15007097 16844780 23766336 24224966
NCU10045	ce8-1	pectin methyl esterase	Pectin	1937044 16844780 22345350 22462823 24224966
NCU05598	pl4-1	rhamnogalacturonan lyase	Pectin	12387863 16844780 19555771 22345350 24224966
NCU00972	gh53-1	endo-b-1,4-galactanase	Pectin	12383257 16844780 24224966
NCU05882	gh5-5	endo-b-1,6-galactanase	Pectin	17351093 20932514 24224966
NCU09702		endo-b-1,6-galactanase	Pectin	20932514
NCU00852	gh43-1	endoarabinanase	Pectin	12712197 16844780
NCU05965	gh43-7	endoarabinanase	Pectin	24224966
NCU09924	gh93-1	exoarabinanase	Pectin	11425761
NCU00937	gh79-1	extracellular b-glucuronidase	Pectin	18377882 24224966
NCU08179	gh79-2	extracellular b-glucuronidase	Pectin
NCU09976	ce12-1	rhamnogalacturonan acetyl esterase	Pectin	10990025 16844780 20018766 24224966
NCU00743	gh13-7	amylo-a-1,6-glucosidase	Starch	12712197 15007097
NCU02478	gh13-8	a-amylase	Starch	12712197 15007097
NCU05429	gh13-9	a-amylase	Starch	12712197 15007097
NCU05873	gh13-6	a-amylase	Starch	12712197 15007097 18048915 19049410
NCU08131	gh13-1	a-amylase	Starch	12712197 15007097 19049410
NCU08132	gh13-10	a-amylase	Starch	12712197 15007097 19049410
NCU09486	gh13-3	a-amylase	Starch	12712197 15007097 18048915 19049410
NCU09805	gh13-2	a-amylase	Starch	12712197 15007097 19049410 21980519
NCU08746		starch-active lytic polysaccharide monooxygenase (LPMO)	Starch	25201969
NCU01517	gla-1	extracellular a-glucosidase	Starch	6203744 12712197 15007097
NCU02583	gla-2	extracellular a-glucosidase	Starch	12712197 15007097 16844780
NCU03098	gh15-1	extracellular a-glucosidase	Starch	12712197 15007097
NCU04203	gh31-2	extracellular a-glucosidase	Starch	12712197 15007097
NCU04674	gh31-3	extracellular a-glucosidase	Starch	12712197 15007097 16844780
NCU09281	gh31-1	extracellular a-glucosidase	Starch	12712197 15007097 17031028 16844780
NCU08398		extracellular aldose 1-epimerase	Starch	12712197 15007097 21980519
NCU08516		extracellular aldose 1-epimerase	Starch	12712197 15007097
NCU00801	cdt-1	cellodextrin transporter	Cellulose, Hemicellulose	2039228 19777228 20018766 20348908 20400566 20829451 21187422 22474347 22532664	CDT-1 can transport up to G5.
NCU00809		cellobiose transporter	Cellulose, Hemicellulose	20871937 21187422
NCU08114	cdt-2	cellodextrin and xylodextrin transporter	Cellulose, Hemicellulose	2039228 19777228 20018766 20348908 20400566 20829451 21187422 22345350 22474347 22532664 22532664 24586693 25647728	CDT-2 can transport up to G3. CDT-2 can transport up to X4.
NCU05853	cdt-3	cellobionic acid transporter	Cellulose, Hemicellulose	24881580 25398875
NCU01633	glt-1	glucose transporter	Cellulose, Hemicellulose, Starch	24581151
NCU04963	an29-2	glucose and xylose transporter	Cellulose, Hemicellulose, Pectin, Starch	20018766 20714641 22345350
NCU06138	xy31	glucose and xylose transporter	Cellulose, Hemicellulose, Pectin, Starch	20018766 20714641 22345350 22532664
NCU10021	hgt-1	glucose transporter	Cellulose, Hemicellulose, Starch	15531214 20018766 20876563 22474347
NCU01132	xat-1	xylose and arabinose transporter	Hemicellulose, Pectin	24581151 25841015
NCU02188	lat-1	xylose and arabinose transporter	Hemicellulose, Pectin	20714641 24224966 25841015
NCU00988	gat-1	galacturonic acid and glucuronic acid transporter	Hemicellulose, Pectin	24502254
NCU00821	an25	xylose transporter	Hemicellulose, Pectin	20714641 24224966
NCU04537		xylose transporter	Hemicellulose, Pectin	20714641
NCU05627	xyt-1	xylose transporter	Hemicellulose, Pectin	24581151
NCU09287		xylose transporter	Hemicellulose, Pectin	20714641
NCU05897		fucose transporter	Hemicellulose	20018766 22345350 24224966
NCU01868		maltose transporter	Starch	12712197 15007097
NCU06522		maltose transporter	Starch	12712197 15007097
NCU12154		maltose transporter	Starch	12712197 15007097
NCU00130	gh1-1	intracellular b-glucosidase	Cellulose, Hemicellulose	20018766 20829451 22345350 22474347 22532664
NCU05577	gh3-5	intracellular b-glucosidase	Cellulose, Hemicellulose	18340445 23410930
NCU07487	gh3-6	intracellular b-glucosidase	Cellulose, Hemicellulose	22462823 23410930
NCU08054	gh3-2	intracellular b-glucosidase	Cellulose, Hemicellulose	10671536 17259976 23410930
NCU09425	gh94-1	cellobiose phosphorylase	Cellulose, Hemicellulose	5653182 9249035 21336923 22474347 22532664 23178501 24055472 24944578 26279678
NCU10058	rg-1	phosphoglucomutase	Cellulose, Hemicellulose	12712197 15007097
NCU00575		hexokinase	Cellulose, Hemicellulose, Starch	671283
NCU02542		hexokinase	Cellulose, Hemicellulose, Starch	671283
NCU04728		hexokinase	Cellulose, Hemicellulose, Starch	12712197 15007097
NCU06996		hexokinase	Cellulose, Hemicellulose, Starch	12712197 15007097
NCU07626		hexokinase	Cellulose, Hemicellulose, Starch	12712197 15007097 26279678
NCU04923	gcy-1	glyceraldehyde reductase	Cellulose, Hemicellulose, Starch, Pectin	16930134 18768163 24224966
NCU01900	gh43-2	intracellular b-xylosidase	Hemicellulose	22345350 22474347 25647728
NCU09652	gh43-5	intracellular b-xylosidase	Hemicellulose	22345350 22462823 22474347 22532664 22532664 24224966 25647728
NCU08384		D-xylose reductase, L-arabinose reductase, D-galactose reductase	Hemicellulose, Pectin	700255 24581151
NCU00891		xylitol dehydrogenase, D-sorbitol dehydrogenase	Hemicellulose, Pectin	656325 24581151
NCU11353		xylulokinase	Hemicellulose, Pectin	645058 24581151
NCU00519		ribulose-phosphate 3-epimerase	Hemicellulose, Pectin	12712197 15007097 15531214
NCU00643		L-arabitol dehydrogenase, galactitol dehydrogenase	Hemicellulose, Pectin	696988 24581151
NCU09041		L-xylulose reductase, L-sorbitol reductase	Hemicellulose, Pectin	17261518 24581151
NCU00890	gh2-1	intracellular b-mannosidase	Hemicellulose	16844780 23766336 24224966
NCU02322		mannose-6-phosphate isomerase	Hemicellulose	17261518 24581151 24692637
NCU07165		mannose-6-phosphate isomerase	Hemicellulose	705568 17261518 24581151
NCU08687		galactokinase	Hemicellulose, Pectin	12712197 15007097 17452322
NCU04460		galactose-1-phosphate uridylyltransferase	Hemicellulose, Pectin	12712197 15007097 17898858
NCU07072		galactose-1-phosphate uridylyltransferase	Hemicellulose, Pectin	12712197 15007097 17898858
NCU02654	gh105-1	unsaturated rhamnogalacturonyl hydrolase	Pectin	24224966
NCU01906		D-galacturonate reductase	Pectin	16101307 21388872 24224966
NCU09533		D-galacturonate reductase	Pectin	18768163 24224966
NCU07064		L-galactonate dehydratase	Pectin	16879654 18768163 24224966
NCU05977		2-keto-3-deoxy-L-galactonate aldolase	Pectin	18505728 18768163 22037608 24224966
NCU09532		2-keto-3-deoxy-L-galactonate aldolase	Pectin	17609199 18768163 20796274 24224966
NCU01399		4-deoxy-L-erythro-5-hexoseulose uronate reductase	Pectin	20685299 22267807	DELTA BLAST with characterized gene in Sphigomonas gives high similarity with NCU01399.
NCU09035		L-rhamnose 1-dehydrogenase	Pectin	18400031 22037608 24224966
NCU03605		L-rhamnono-1,4-lactonase	Pectin	18400031 22037608
NCU09034		L-rhamnonate dehydratase	Pectin	18505728 22037608 24224966
NCU05037		L-2-keto-3-deoxy-rhamnonate aldolase	Pectin	18505728 22037608 24224966
NCU00378		lactaldehyde dehydrogenase	Pectin	17202142 18793327 22037608
NCU00417		lactaldehyde dehydrogenase	Pectin	17202142 18793327 22037608
NCU00810	gh2-3	intracellular b-galactosidase	Pectin	17625262 22345350 23766336
NCU05956	gh2-2	intracellular b-galactosidase	Pectin	17625262 22345350 23766336
NCU06523	gh13-4	intracellular a-glucosidase	Starch	12712197 15007097 19049410 20562106
NCU07860	gh13-5	intracellular a-glucosidase	Starch	12712197 15007097 19049410
NCU04442		intracellular aldose 1-epimerase	Starch	12712197 14764091 15007097
NCU08030		intracellular aldose 1-epimerase	Starch	12712197 15007097
NCU09705		intracellular aldose 1-epimerase	Starch	12712197 15007097 22462823

## Sheet: Compounds
Abbreviation	Localization	Compound Name	Chemical Formula	CHEBI Identifier	KEGG Identifier	Notes
acetate[c]	Intracellular	Acetate	C2H4O2	CHEBI:15366	C00033
acetate[e]	Extracellular	Acetate	C2H4O2	CHEBI:15366	C00033
adp[c]	Intracellular	Adenosine 5'-diphosphate	C10H15N5O10P2	CHEBI:16761	C00008
alpha-D-glucose[c]	Intracellular	a-D-Glucose	C6H12O6	CHEBI:4167	C00031
alpha-D-glucose[e]	Extracellular	a-D-Glucose	C6H12O6	CHEBI:4167	C00031
alpha-D-galactose[c]	Intracellular	a-D-Galactose	C6H12O6	CHEBI:28061	C00984
alpha-D-galactose-1-phosphate[c]	Intracellular	a-D-Galactose-1-phosphate	C6H13O9P	CHEBI:17973	C00446
atp[c]	Intracellular	Adenosine 5'-triphosphate	C10H16N5O13P3	CHEBI:15422	C00002
beta-D-glucose[c]	Intracellular	D-Glucose	C6H12O6	CHEBI:4167	C00031
beta-D-glucose[e]	Extracellular	D-Glucose	C6H12O6	CHEBI:4167	C00031
beta-1,3-D-xylosyl-D-galacturonate[e]	Extracellular	beta-1,3-D-xylosyl-D-galacturonate	C11H10O10
cellobionic_acid[c]	Intracellular	Cellobionic acid	C12H22O12	CHEBI:77021
cellobionic_acid[e]	Extracellular	Cellobionic acid	C12H22O12	CHEBI:77021
cellobiono-1,5-lactone[e]	Extracellular	Cellobiono-1,5-lactone	C12H20O11	CHEBI:17863	C01093
cellobiose[c]	Intracellular	Cellobiose	C12H22O11	CHEBI:17057	C00185
cellobiose[e]	Extracellular	Cellobiose	C12H22O11	CHEBI:17057	C00185
cellopentaose[c]	Intracellular	Cellopentaose	C30H52O26	CHEBI:62976	C06218
cellopentaose[e]	Extracellular	Cellopentaose	C30H52O26	CHEBI:62976	C06218
cellotetraose[c]	Intracellular	Cellotetraose	C24H42O21	CHEBI:62974	C02013
cellotetraose[e]	Extracellular	Cellotetraose	C24H42O21	CHEBI:62974	C02013
cellotriose[c]	Intracellular	Cellotriose	C18H32O16	CHEBI:3528	C06219
cellotriose[e]	Extracellular	Cellotriose	C18H32O16	CHEBI:3528	C06219
D-fructose[c]	Intracellular	D-Fructose	C6H12O6	CHEBI:15824	C00095
D-fructose-6-phosphate[c]	Intracellular	D-Fructose 6-phosphate	C6H13O9P	CHEBI:15946	C00085
D-galactonate[c]	Intracellular	D-Galactonate	C6H12O7	CHEBI:12931	C00880
D-galactono-1,4-lactone[c]	Intracellular	D-Galactono-1,4-lactone	C6H10O6	CHEBI:15895	C03383
D-galactose[c]	Intracellular	D-Galactose	C6H12O6	CHEBI:4139	C00124
D-galactose[e]	Extracellular	D-Galactose	C6H12O6	CHEBI:4139	C00124
D-galacturonate[c]	Intracellular	D-Galacturonate	C6H10O7	CHEBI:4153	C00333
D-galacturonate[e]	Extracellular	D-Galacturonate	C6H10O7	CHEBI:4153	C00333
D-gluconate[c]	Intracellular	D-Gluconate	C6H12O7	CHEBI:33198	C00257
D-gluconate[e]	Extracellular	D-Gluconate	C6H12O7	CHEBI:33198	C00257
D-glucono-1,5-lactone[c]	Intracellular	D-Glucono-1,5-lactone	C6H10O6	CHEBI:16217	C00198
D-glucono-1,5-lactone[e]	Extracellular	D-Glucono-1,5-lactone	C6H10O6	CHEBI:16217	C00198
D-glucose-1-phosphate[c]	Intracellular	D-Glucose 1-phosphate	C6H13O9P	CHEBI:29042	C00103
D-glucose-6-phosphate[c]	Intracellular	D-Glucose 6-phosphate	C6H13O9P	CHEBI:4170	C00092
D-glucuronate[c]	Intracellular	D-Glucuronate	C6H10O7	CHEBI:4178	C00191
D-glucuronate[e]	Extracellular	D-Glucuronate	C6H10O7	CHEBI:4178	C00191
D-glyceraldehyde[c]	Intracellular	D-Glyceraldehyde	C3H6O3	CHEBI:17378	C00577
D-mannose-6-phosphate[c]	Intracellular	D-Mannose 6-phosphate	C6H13O9P	CHEBI:17369	C00275
D-mannose[c]	Intracellular	D-Mannose	C6H12O6	CHEBI:4208	C00159
D-mannose[e]	Extracellular	D-Mannose	C6H12O6	CHEBI:4208	C00159
D-ribulose-5-phosphate[c]	Intracellular	D-Ribulose 5-phosphate	C5H11O8P	CHEBI:17363	C00199
D-sorbitol[c]	Intracellular	D-Sorbitol	C6H14O6	CHEBI:17924	C00794
D-xylose[c]	Intracellular	D-Xylose	C5H10O5	CHEBI:15936	C00181
D-xylose[e]	Extracellular	D-Xylose	C5H10O5	CHEBI:15936	C00181
D-xylulose-5-phosphate[c]	Intracellular	D-Xylulose 5-phosphate	C5H11O8P	CHEBI:16332	C00231
D-xylulose[c]	Intracellular	D-Xylulose	C5H10O5	CHEBI:17140	C00310
fad[e]	Extracellular	Flavin adenine dinucleotide	C27H33N9O15P2	CHEBI:16238	C00016
fadh2[e]	Extracellular	FADH2	C27H35N9O15P2	CHEBI:17877	C01352
ferulate[e]	Extracellular	Ferulate	C10H10O4	CHEBI:17620	C01494
galactitol[c]	Intracellular	Galactitol	C6H14O6	CHEBI: 16813	C01697
galactobiose[c]	Intracellular	β-(1→4)-galactobiose	C12H22O11	CHEBI:41034
galactobiose[e]	Extracellular	β-(1→4)-galactobiose	C12H22O11	CHEBI:41034
galactopentaose[c]	Intracellular	β-(1→4)-galactopentaose	C30H52O26	CHEBI:63143
galactopentaose[e]	Extracellular	β-(1→4)-galactopentaose	C30H52O26	CHEBI:63143
galactotetraose[c]	Intracellular	β-(1→4)-galactotetraose	C24H42O21	CHEBI:53687
galactotetraose[e]	Extracellular	β-(1→4)-galactotetraose	C24H42O21	CHEBI:53687
galactotriose[c]	Intracellular	β-(1→4)-galactotriose	C18H32O16	CHEBI:40896
galactotriose[e]	Extracellular	β-(1→4)-galactotriose	C18H32O16	CHEBI:40896
glycerol[c]	Intracellular	Glycerol	C3H8O3	CHEBI:17754	C00116
h2o[c]	Intracellular	H2O	H2O	CHEBI:15377	C00001
h2o[e]	Extracellular	H2O	H2O	CHEBI:15377	C00001
h[c]	Intracellular	H+	H	CHEBI:15378	C00080
h[e]	Extracellular	H+	H	CHEBI:15378	C00080
L-arabinose[c]	Intracellular	L-Arabinose	C5H10O5	CHEBI:17535	C00259
L-arabinose[e]	Extracellular	L-Arabinose	C5H10O5	CHEBI:17535	C00259
L-arabitol[c]	Intracellular	L-Arabitol	C5H12O5	CHEBI:18403	C00532
L-fucose[c]	Intracellular	L-Fucose	C6H12O5	CHEBI:2181	C01019
L-fucose[e]	Extracellular	L-Fucose	C6H12O5	CHEBI:2181	C01019
L-galactonate[c]	Intracellular	L-Galactonate	C6H12O7	CHEBI:53071	C15930
L-glyceraldehyde[c]	Intracellular	L-Glyceraldehyde	C3H6O3	CHEBI:27975	C02426
L-gulonate[c]	Intracellular	L-Gulonate	C6H11O7	CHEBI:13115	C00800
L-lactaldehyde[c]	Intracellular	L-Lactaldehyde	C3H6O2	CHEBI:18041	C00424
L-lactate[c]	Intracellular	L-Lactate	C3H6O3	CHEBI:422	C00186
L-rhamnonate[c]	Intracellular	L-Rhamnonate	C6H12O6	CHEBI:17357	C01934
L-rhamnono-1,4-lactone[c]	Intracellular	L-Rhamnono-1,4-lactone	C6H10O5	CHEBI:17937	C02991
L-rhamnose[c]	Intracellular	L-Rhamnose	C6H12O5	CHEBI:62345	C00507
L-rhamnose[e]	Extracellular	L-Rhamnose	C6H12O5	CHEBI:62345	C00507
L-xylo-3-hexulose[c]	Intracellular	L-Sorbose	C6H12O6	CHEBI:48649	C00247
L-xylulose[c]	Intracellular	L-Xylulose	C5H10O5	CHEBI:17399	C00312
maltobionic_acid[e]	Extracellular	Maltobionic acid	C12H22O12
maltobiono-1,5-lactone[e]	Extracellular	Maltobiono-l,5-lac tone	C12H20O11
maltopentaose[c]	Intracellular	Maltopentaose	C30H52O26	CHEBI:62006
maltopentaose[e]	Extracellular	Maltopentaose	C30H52O26	CHEBI:62006
maltose[c]	Intracellular	Maltose	C12H22O11	CHEBI:17306	C00208
maltose[e]	Extracellular	Maltose	C12H22O11	CHEBI:17306	C00208
maltotetraose[c]	Intracellular	Maltotetraose	C24H42O21	CHEBI:28460
maltotetraose[e]	Extracellular	Maltotetraose	C24H42O21	CHEBI:28460
maltotriose[c]	Intracellular	Maltotriose	C18H32O16	CHEB:27931	C01835
maltotriose[e]	Extracellular	Maltotriose	C18H32O16	CHEB:27931	C01835
mannobiose[c]	Intracellular	Mannobiose	C12H22O11	CHEBI:28085	C01728
mannobiose[e]	Extracellular	Mannobiose	C12H22O11	CHEBI:28085	C01728
mannopentaose[c]	Intracellular	Mannopentaose	C30H52O26	CHEBI:61309
mannopentaose[e]	Extracellular	Mannopentaose	C30H52O26	CHEBI:61309
mannotetraose[c]	Intracellular	Mannotetraose	C24H42O21	CHEBI:62973
mannotetraose[e]	Extracellular	Mannotetraose	C24H42O21	CHEBI:62973
mannotriose[c]	Intracellular	Mannotriose	C18H32O16	CHEBI:62785
mannotriose[e]	Extracellular	Mannotriose	C18H32O16	CHEBI:62785
methanol[e]	Extracellular	Methanol	CH4O	CHEBI:17790	C00132
nad[c]	Intracellular	NAD+	C21H28N7O14P2	CHEBI:15846	C00003
nadh[c]	Intracellular	NADH	C21H29N7O14P2	CHEBI:16908	C00004
nadp[c]	Intracellular	NADP+	C21H29N7O17P3	CHEBI:18009	C00006
nadph[c]	Intracellular	NADPH	C21H30N7O17P3	CHEBI:16474	C00005
o2[e]	Extracellular	Oxygen	O2	CHEBI:15379	C00007
pi[c]	Intracellular	Phosphate	H3PO4	CHEBI:18367	C00009
pyruvate[c]	Intracellular	Pyruvate	C3H4O3	CHEBI:32816	C00022
xylitol[c]	Intracellular	Xylitol	C5H12O5	CHEBI:17151	C00379
xylobiose[c]	Intracellular	Xylobiose	C10H18O9	CHEBI:28309	C01630
xylobiose[e]	Extracellular	Xylobiose	C10H18O9	CHEBI:28309	C01630
xylopentaose[c]	Intracellular	Xylopentaose	C25H42O21
xylopentaose[e]	Extracellular	Xylopentaose	C25H42O21
xylotetraose[c]	Intracellular	Xylotetraose	C20H34O17	CHEBI:62972
xylotetraose[e]	Extracellular	Xylotetraose	C20H34O17	CHEBI:62972
xylotriose[c]	Intracellular	Xylotriose	C15H26O13	CHEBI:62797
xylotriose[e]	Extracellular	Xylotriose	C15H26O13	CHEBI:62797
UDP-D-galactose[c]	Intracellular	UDP-D-galactose	C15H24N2O17P2	CHEBI:18307	C00052
UDP-D-glucose[c]	Intracellular	UDP-D-glucose	C15H24N2O17P2	CHEBI:18066	C00029
unsaturated_digalacturonate[c]	Intracellular	4-(4-Deoxy-alpha-D-gluc-4-enuronosyl)-D-galacturonate	C12H16O12	CHEBI:27450	C06118
unsaturated_digalacturonate[e]	Extracellular	4-(4-Deoxy-alpha-D-gluc-4-enuronosyl)-D-galacturonate	C12H16O12	CHEBI:27450	C06118
unsaturated_galacturonate[c]	Intracellular	4-deoxy-β-L-threo-hex-4-enopyranuronate	C6H7O6	CHEBI:62482
2-keto-3-deoxy-D-gluconate[c]	Intracellular	2-Keto-3-deoxy-D-gluconate	C6H10O6	CHEBI:17032	C00204
3-keto-L-gulonate[c]	Intracellular	3-Keto-L-gulonate	C6H9O7	CHEBI:57655	C00618
(4-deoxy-4,5-unsaturated-D-galactopyranosyluronate)-L-rhamnose[c]	Intracellular	(4-deoxy-4,5-unsaturated-D-galactopyranosyluronate)-L-rhamnose
(4-deoxy-4,5-unsaturated-D-galactopyranosyluronate)-L-rhamnose[e]	Extracellular	(4-deoxy-4,5-unsaturated-D-galactopyranosyluronate)-L-rhamnose
(4-deoxy-6-O-methyl-alpha-D-galact-4-enuronosyl)-D-galacturonate[e]	Extracellular	(4-deoxy-6-O-methyl-alpha-D-galact-4-enuronosyl)-D-galacturonate
4-O-beta-D-Mannopyranosyl-D-glucose[e]	Extracellular	4-O-beta-D-Mannopyranosyl-D-glucose	C12H22O11	CHEBI:64351
4-keto-D-glucose[e]	Extracellular	4-keto-D-glucose	C6H10O6
4-ketocellobiose[e]	Extracellular	4-ketocellobiose	C12H20O11
5-dehydro-4-deoxy-D-glucuronate[c]	Intracellular	5-Dehydro-4-deoxy-D-glucuronate	C6H8O6	CHEBI:17117	C04053
cellulose[e]	Extracellular	Cellulose	(C6H10O5)n	CHEBI:18246	C00760	Straight chain polymer made up of b(1→4) bound D-Glucose molecules.
beta14glucan_cut_reducing_nonreducing[e]	Extracellular					Chain of b(1→4) bound D-Glucose molecules cleaved through hydrolysis mechanism.
beta14glucan_cut_lactone_nonreducing[e]	Extracellular					Chain of b(1→4) bound D-Glucose molecules cleaved through oxidative mechanism by PMO-1 and PMO-3.
beta14glucan_cut_reducing_ketoaldose[e]	Extracellular					Chain of b(1→4) bound D-Glucose molecules cleaved through oxidative mechanism by PMO-2 and PMO-3.
hemicellulose[e]	Extracellular	Hemicellulose		CHEBI:61266		Hemicelluloses are polysaccharides in plant cell walls that have β-(1→4)-linked backbones with an equatorial configuration. Hemicelluloses include Xylan, Xyloglucan, Mannan, Galactomannan, Glucomannan and Mixed Linkage Glucan.
xylan[e]	Extracellular	1,4-beta-D-Xylan	(C5H8O4)n	CHEBI:15447	C02352	Polymer with backbone of b(1→4) bound xylose molecules.
xyloglucan[e]	Extracellular	Xyloglucan		CHEBI:18233	C00807	Glucan with backbone of b(1→4) bound glucose molecules with many glucose molecules substituted with a(1→6)-linked xylose side chains.
mannan[e]	Extracellular	1,4-beta-D-Mannan	(C6H10O5)n	CHEBI:28808	C02492	Straight chain polymer made up of b(1→4) bound mannose molecules.
galactomannan[e]	Extracellular	Galactomannan		CHEBI:27680		A heteroglycan consisting of a Mannan backbone with D-Galactose side groups.
glucomannan[e]	Extracellular	Glucomannan		CHEBI:17020	C01810	A heteroglycan consisting of β-(1→4)-linked glucose and mannose.
mixed_linkage_glucan[e]	Extracellular	Mixed Linkage Glucan				Polymer made up of b(1→4) and b(1→3) bound D-Glucose molecules.
beta1314glucan_cut_reducing_nonreducing[e]	Extracellular					Chain of b(1→4) and b(1→3) bound D-Glucose molecules cleaved through hydrolysis mechanism.
beta1314glucan_cut_lactone_nonreducing[e]	Extracellular					Chain of b(1→4) and b(1→3) bound D-Glucose molecules cleaved through oxidative mechanism by PMO-1 and PMO-3.
beta1314glucan_cut_reducing_ketoaldose[e]	Extracellular					Chain of b(1→4) and b(1→3) bound D-Glucose molecules cleaved through oxidative mechanism by PMO-2 and PMO-3.
pectin[e]	Extracellular	Pectin		CHEBI:17309		Pectins are polysaccharides in plant cell walls which can be classified into Homogalacturonan, Xylogalacturonan and Rhamnogalacturonan.
homogalacturonan[e]	Extracellular	Homogalacturonan		CHEBI:60190		Homogalacturonans are linear chains of α(1→4) bound D-galacturonic acid molecules.
xylogalacturonan[e]	Extracellular	Xylogalacturonan		CHEBI:27343		Xylogalacturonan is a substituted Homogalacturonan in which the α(1→4) bound D-Galacturonic acid backbone is substituted at position O-3 with a β-D-xylopyranose.
rhamnogalacturonan[e]	Extracellular	Rhamnogalacturonan		CHEBI:60174		Rhamnogalacturonan contains a backbone of the repeating disaccharide: 4)-α-D-galacturonic acid-(1,2)-α-L-rhamnose-(1.
galacturonan_oligosaccharide[e]	Extracellular	Galacturonan oligosaccharide				Short chain of α(1→4) bound D-Galacturonic acid molecules.
xylogalacturonan_oligosaccharide[e]	Extracellular	Xylogalacturonan oligosaccharide				Short chain of α(1→4) bound D-Galacturonic acid molecules substituted at position O-3 with a β-D-xylopyranose.
rhamnogalacturonan_oligosaccharide[e]	Extracellular	Rhamnogalacturonan oligosaccharide				Short chain of repeating disaccharide: 4)-α-D-galacturonic acid-(1,2)-α-L-rhamnose-(1.
arabinogalactan[e]	Extracellular	Arabinogalactan		CHEBI:27569	C00569	Arabinogalactan is a polymer of L-Arabinose and D-Galactose molecules.
arabinan[e]	Extracellular	Arabinan	(C15H24O12)n	CHEBI:22590	C02474	Arabinans are branched polysaccharides with a backbone of α(1→5) bound L-Arabinose molecules with α(1→2) and α(1→3) linked side chains.
galactan[e]	Extracellular	Galactan	(C12H20O11)n	CHEBI:37165	C05796	Galactans are branched polysaccharides with a backbone of α(1→6) bound D-Galactose molecules.
starch[e]	Extracellular	Starch	(C12H20O10)n	CHEBI:28017	C00369	Starch is a polymer made up of Amylose and Amylopectin.
amylopectin[e]	Extracellular	Amylopectin		CHEBI:28057		Brancehed polymer made up of α(1→4) bound glucose molecules in the backbone and α(1→6) bound D-Glucose molecules at branch points.
amylose[e]	Extracellular	Amylose	(C6H10O5)n	CHEBI:28102	C00718	Straight chain polymer made up of α(1→4) bound D-Glucose molecules.
alpha14glucan[e]	Extracellular	1,4-alpha-D-Glucan	(C6H10O5)n	CHEBI:28102	C00718	Straight chain polymer made up of α(1→4) bound D-Glucose molecules.
alpha14glucan_cut_lactone_nonreducing[e]	Extracellular					Chain of α(1→4) bound D-Glucose molecules cleaved through oxidative mechanism by Starch-active PMO.

## Sheet: Pathway_Participation
Gene	Cellulose	Hemicellulose	Pectin	Starch	Our Annotation	Name
NCU00762	1	1			endo-b-1,4-glucanase	gh5-1
NCU04027	1	1				gh7-3
NCU04854	1	1				gh7-2
NCU05057	1	1				gh7-1
NCU05121	1	1				gh45-1
NCU05955	1	1				gh74-1
NCU09764	1	1			endo-b-1,4-glucanase and exo-b-1,3/1,6-glucanase
NCU00836	1	1			lytic polysaccharide monooxygenase 1 (LPMO1)
NCU01867	1	1				NcLPMO9J
NCU02344	1	1
NCU03328	1	1				NcLPMO9F
NCU08760	1	1				NcLPMO9E
NCU03000	1	1			lytic polysaccharide monooxygenase 3 (LPMO3)
NCU05969	1	1
NCU07520	1	1
NCU07760	1	1
NCU07898	1	1				NcLPMO9M
NCU07974	1	1
NCU01050	1	1			lytic polysaccharide monooxygenase 2 (LPMO2)	NcLPMO9D
NCU02240	1	1
NCU02916	1	1				NcLPMO9C
NCU03996	1	1			exo-b-1,4-glucanase or cellobiohydrolase	gh6-1
NCU05104	1	1				gh7-4
NCU07190	1	1				gh6-3
NCU07340	1	1				cbh-1
NCU09680	1	1				gh6-2 or cbh-2
NCU01866	1	1		1	extracellular lactonase
NCU07143	1	1		1
NCU07703	1	1		1
NCU00206	1	1			cellobiose dehydrogenase	cdh-1
NCU05923	1	1				cdh-2
NCU03641	1	1			extracellular b-glucosidase	gh3-1
NCU04952	1	1				gh3-4
NCU08755	1	1				gh3-3
NCU02855		1			endo-b-1,4-xylanase	gh11-1
NCU04997		1				gh10-3
NCU05924		1				gh10-1
NCU07130		1				gh10-4
NCU07225		1				gh11-2
NCU08189		1				gh10-2
NCU02343		1	1		a-arabinofuranosidase	gh51-1
NCU07326		1	1			gh43-6
NCU09170		1	1			gh43-4
NCU09775		1	1			gh54-1
NCU06143		1			a-glucuronidase	gh115-1
NCU07351		1				gh67-1
NCU02550		1			a-galactosidase	gh36-1
NCU00642		1	1		extracellular b-galactosidase	gh35-1
NCU04623		1	1			gh35-2
NCU08785		1	1		feruloyl esterase	ce1-3
NCU09026		1	1
NCU09491		1	1			fea-1
NCU09774		1	1			ce1-5
NCU00710		1	1		acetyl esterase	ce1-4
NCU03181		1	1
NCU04494		1	1			ce1-2
NCU04870		1	1			ce1-1
NCU05159		1	1			ce5-1
NCU09663		1	1			ce5-2
NCU09664		1	1			ce5-3
NCU00709		1	1		extracellular b-xylosidase	gh3-8
NCU09923		1	1			gh3-7
NCU09416		1			acetyl mannan esterase
NCU08412		1			endo-b-1,4-mannanase	gh5-7
NCU00985		1			(probable) extracellular b-mannosidase	gh2-4
NCU04885		1			a-xylosidase	gh31-4
NCU06381		1			endo-b-1,3-glucanase	gh17-1
NCU07347		1				gh17-2
NCU09175		1				gh17-3
NCU03914		1			exo-b-1,3-glucanase	gh5-4
NCU09326		1				gh17-4
NCU02369			1		endogalacturonase	gh28-1
NCU06961			1		exogalacturonase	gh28-2
NCU06326			1		pectate lyase	pl1-1
NCU08176			1			pl3-1
NCU10045			1		pectin methyl esterase	ce8-1
NCU05598			1		rhamnogalacturonan lyase	pl4-1
NCU00972			1		endo-b-1,4-galactanase	gh53-1
NCU05882			1		endo-b-1,6-galactanase	gh5-5
NCU09702			1
NCU00852			1		endoarabinanase	gh43-1
NCU05965			1		endoarabinanase	gh43-7
NCU09924			1		exoarabinanase	gh93-1
NCU00937			1		extracellular b-glucuronidase	gh79-1
NCU08179			1			gh79-2
NCU09976			1		rhamnogalacturonan acetyl esterase	ce12-1
NCU00743				1	amylo-a-1,6-glucosidase	gh13-7
NCU02478				1	a-amylase	gh13-8
NCU05429				1		gh13-9
NCU05873				1		gh13-6
NCU08131				1		gh13-1
NCU08132				1		gh13-10
NCU09486				1		gh13-3
NCU09805				1		gh13-2
NCU08746				1	starch-active lytic polysaccharide monooxygenase (LPMO)
NCU01517				1	extracellular a-glucosidase	gla-1
NCU02583				1		gla-2
NCU03098				1		gh15-1
NCU04203				1		gh31-2
NCU04674				1		gh31-3
NCU09281				1		gh31-1
NCU08398				1	extracellular aldose 1-epimerase
NCU08516				1
NCU00801	1	1			cellodextrin transporter	cdt-1
NCU00809	1	1			cellobiose transporter
NCU08114	1	1			cellodextrin and xylodextrin transporter	cdt-2
NCU05853	1	1			cellobionic acid transporter	cdt-3
NCU01633	1	1		1	glucose transporter	glt-1
NCU04963	1	1	1	1	glucose and xylose transporter	an29-2
NCU06138	1	1	1	1	glucose and xylose transporter	xy31
NCU10021	1	1		1	glucose transporter	hgt-1
NCU01132		1	1		xylose and arabinose transporter	xat-1
NCU02188		1	1		xylose and arabinose transporter	lat-1
NCU00988		1	1		galacturonic acid and glucuronic acid transporter	gat-1
NCU00821		1	1		xylose transporter	an25
NCU04537		1	1		xylose transporter
NCU05627		1	1		xylose transporter	xyt-1
NCU09287		1	1		xylose transporter
NCU05897		1			fucose transporter
NCU01868				1	maltose transporter
NCU06522				1	maltose transporter
NCU12154				1	maltose transporter
NCU00130	1	1			intracellular b-glucosidase	gh1-1
NCU05577	1	1				gh3-5
NCU07487	1	1				gh3-6
NCU08054	1	1				gh3-2
NCU09425	1	1			cellobiose phosphorylase	gh94-1
NCU10058	1	1			phosphoglucomutase	rg-1
NCU00575	1	1		1	hexokinase
NCU02542	1	1		1
NCU04728	1	1		1
NCU06996	1	1		1
NCU07626	1	1		1
NCU04923	1	1		1	glyceraldehyde reductase	gcy-1
NCU01900		1			intracellular b-xylosidase	gh43-2
NCU09652		1				gh43-5
NCU08384		1	1		D-xylose reductase, L-arabinose reductase, D-galactose reductase
NCU00891		1	1		xylitol dehydrogenase, D-sorbitol dehydrogenase
NCU11353		1	1		xylulokinase
NCU00519		1	1		ribulose-phosphate 3-epimerase
NCU00643		1	1		L-arabitol dehydrogenase, galactitol dehydrogenase
NCU09041		1	1		L-xylulose reductase, L-sorbitol reductase
NCU00890		1			intracellular b-mannosidase	gh2-1
NCU02322		1			mannose-6-phosphate isomerase
NCU07165		1
NCU08687		1	1		galactokinase
NCU04460		1	1		galactose-1-phosphate uridylyltransferase
NCU07072		1	1		galactose-1-phosphate uridylyltransferase
NCU02654			1		unsaturated rhamnogalacturonyl hydrolase	gh105-1
NCU01906			1		D-galacturonate reductase
NCU09533			1
NCU07064			1		L-galactonate dehydratase
NCU05977			1		2-keto-3-deoxy-L-galactonate aldolase
NCU09532			1		2-keto-3-deoxy-L-galactonate aldolase
NCU01399			1		4-deoxy-L-erythro-5-hexoseulose uronate reductase
NCU09035			1		L-rhamnose 1-dehydrogenase
NCU03605			1		L-rhamnono-1,4-lactonase
NCU09034			1		L-rhamnonate dehydratase
NCU05037			1		L-2-keto-3-deoxy-rhamnonate aldolase
NCU00378			1		lactaldehyde dehydrogenase
NCU00417			1
NCU00810			1		intracellular b-galactosidase	gh2-3
NCU05956			1			gh2-2
NCU06523				1	intracellular a-glucosidase	gh13-4
NCU07860				1		gh13-5
NCU04442				1	intracellular aldose 1-epimerase
NCU08030				1
NCU09705				1

## Sheet: Feature_Matrix
Gene	Name	Our Annotation	Functional Genomics									Transcriptomics																																Proteomics			Mutant Phenotype
												Annotation Suport	Differential Expression relative to NoC condition										Change in Mean FPKM relative to NoC condition										Mean FPKM
			Annotation Support	CAZY	BROAD Annotation version 12	BROAD Annotation version 10	TransportDB Annotation	SignalP	Phobius Signal Peptide	WoLF PSORT Subcellular Localization	ProtComp Subcellular Localization		Sucrose	CB	Avicel	Xylan	XG	Mannan	MLG	Pectin	OPP	Starch	Sucrose	CB	Avicel	Xylan	XG	Mannan	MLG	Pectin	OPP	Starch	NoC	Sucrose	CB	Avicel	Xylan	XG	Mannan	MLG	Pectin	OPP	Starch	Annotation Support	Detected in Secretome	Increased abundance in Avicel versus NoC	Annotation Support	Condition	References
NCU00762	gh5-1	endo-b-1,4-glucanase	1	GH5	glycosylhydrolase family 5-1	endoglucanase 3		Y	Y	Extracellular	Extracellular	1	0	0	1	1	1	1	1	1	0	0	0.369233	1.12396	2205.78	14.5756	5.27402	8.76951	2632.25	8.31577	1.30546	0.189897	2.10215	0.776182	2.36272	4636.87	30.64	11.0868	18.4348	5533.38	17.481	2.74427	0.399191	1	Yes		1	Avicel	20018766
NCU04027	gh7-3	endo-b-1,4-glucanase	0	GH7	glycosylhydrolase family 7-3	endoglucanase EG-1		N	N	Cytoplasm	Mitochondria	0	0	0	0	0	0	0	0	0	0	0	0	0	0.331577	0	1.04397	0.778954	0	0	0.409718	0	0.0240503	0	0	0.00797453	0	0.0251079	0.0187341	0	0	0.00985385	0	0			0
NCU04854	gh7-2	endo-b-1,4-glucanase	1	GH7	glycosylhydrolase family 7-2	endoglucanase EG-1		Y	Y	Extracellular	Extracellular	1	0	-1	1	0	0	0	1	0	0	-1	0.266223	0.281846	34.5965	1.33956	1.19374	1.11648	12.5738	0.355228	0.548017	0.215211	5.25652	1.39941	1.48153	181.857	7.0414	6.27493	5.86878	66.0942	1.86726	2.88066	1.13126	1	Yes		0
NCU05057	gh7-1	endo-b-1,4-glucanase	1	GH7	glycosylhydrolase family 7-1	endoglucanase EG-1		Y	Y	Extracellular	Extracellular	1	0	0	1	1	1	0	1	1	1	0	0.25781	0.895552	358.136	3.34659	2.7399	1.28549	730.019	3.53417	2.205	0.293558	4.50178	1.16061	4.03158	1612.25	15.0656	12.3344	5.787	3286.38	15.9101	9.92643	1.32153	1	Yes		0
NCU05121	gh45-1	endo-b-1,4-glucanase	1	GH45	glycosylhydrolase family 45-1	endoglucanase V		Y	Y	Extracellular	Extracellular	1	-1	0	1	0	0	0	1	0	-1	-1	0.149586	0.249073	11.341	0.437795	0.893883	0.675177	10.1718	0.387582	0.303961	0.114095	7.88344	1.17925	1.96355	89.4061	3.45133	7.04687	5.32272	80.1886	3.05548	2.39626	0.899465	1	Yes		0
NCU05955	gh74-1	endo-b-1,4-glucanase	1	GH74	Cel74a	Cel74a		Y	Y	Extracellular	Extracellular	1	-1	0	1	0	0	0	1	0	0	0	0.136966	0.33969	44.2231	0.540855	1.27878	0.906556	51.168	0.447332	0.51	0.270753	15.4312	2.11355	5.24181	682.414	8.34602	19.7331	13.9892	789.583	6.90286	7.86991	4.17803	1	Yes		0
NCU09764		endo-b-1,4-glucanase and exo-b-1,3/1,6-glucanase	1	GH131	hypothetical protein	hypothetical protein		Y	Y	Extracellular	Extracellular	1	1	1	1	1	1	0	1	1	1	0	3.06881	8.88277	287.724	2.17373	2.91378	1.10809	710.474	6.14942	5.30675	1.37791	1.85861	5.70372	16.5096	534.766	4.04012	5.41558	2.0595	1320.49	11.4294	9.86318	2.561	1	Yes		0
NCU00836		lytic polysaccharide monooxygenase 1 (LPMO1)	0	AA9	glycosylhydrolase family 61-7	hypothetical protein		Y	Y	Extracellular	Extracellular	1	0	1	1	1	1	0	1	1	1	0	0.525186	1.74484	909.253	4.54628	3.7376	2.08585	1272.11	2.63833	2.9165	0.173927	2.06762	1.08588	3.60766	1879.99	9.39998	7.72793	4.31275	2630.24	5.45507	6.0302	0.359614	0			0
NCU01867	NcLPMO9J	lytic polysaccharide monooxygenase 1 (LPMO1)	1	AA9	glycosylhydrolase family 61-10	endoglucanase II		Y	Y	Extracellular	Extracellular	0	-1	-1	0	-1	0	0	0	-1	-1	-1	0.0110943	0.122455	0.384591	0.0595372	0.736964	0.581105	0.27663	0.217955	0.207068	0.155268	2.81002	0.0311751	0.344102	1.08071	0.167301	2.07089	1.63292	0.777338	0.612459	0.581866	0.436308	0			0
NCU02344		lytic polysaccharide monooxygenase 1 (LPMO1)	1	AA9	fungal cellulose binding domain-containing protein	fungal cellulose binding domain-containing protein		Y	Y	Extracellular	Mitochondria	1	1	1	1	1	0	0	1	1	1	1	5.9902	3.8604	22.7735	2.50376	0.958298	0.964307	65.5901	16.266	18.1134	1.76193	2.26262	13.5536	8.73462	51.5279	5.66506	2.16827	2.18186	148.406	36.8039	40.9838	3.98659	0			0
NCU03328	NcLPMO9F	lytic polysaccharide monooxygenase 1 (LPMO1)	1	AA9	glycosylhydrolase family 61-6	endoglucanase II		Y	Y	Extracellular	Extracellular	1	-1	-1	1	-1	0	0	1	-1	-1	-1	0.0202372	0.159326	30.5784	0.245355	0.810908	0.398526	17.9022	0.315637	0.308041	0.117045	30.0894	0.608925	4.79403	920.087	7.38258	24.3997	11.9914	538.667	9.49732	9.26877	3.52181	0			0
NCU08760	NcLPMO9E	lytic polysaccharide monooxygenase 1 (LPMO1)	1	AA9	glycosylhydrolase family 61-5	endoglucanase II		Y	Y	Extracellular	Extracellular	1	0	0	1	1	0	0	1	0	1	0	0.32711	1.24894	775.939	5.89969	1.79501	2.18449	540.024	1.63659	2.01261	0.448586	5.28041	1.72727	6.5949	4097.28	31.1528	9.47837	11.535	2851.55	8.64188	10.6274	2.36872	1	Yes	Yes	0
NCU03000		lytic polysaccharide monooxygenase 3 (LPMO3)	1	AA9	glycosylhydrolase family 61-8	hypothetical protein		Y	Y	Extracellular	Extracellular	0	-1	-1	0	0	0	0	0	0	0	0	0.0336036	0.140677	0.892711	0.34735	1.82243	0.954723	0.295456	0.413246	0.274656	0.209342	1.46992	0.0493947	0.206784	1.31221	0.510576	2.67882	1.40337	0.434296	0.607439	0.403722	0.307715	0			0
NCU05969		lytic polysaccharide monooxygenase 3 (LPMO3)	1	AA9	glycosylhydrolase family 61-9	endo-1,4-beta-glucanase		Y	Y	Extracellular	Extracellular	1	1	1	0	0	0	0	1	1	1	0	1.34975	4.63674	1.75514	0.867209	1.24545	0.842303	10.7655	2.44605	2.52815	0.728501	12.2039	16.4722	56.5862	21.4195	10.5833	15.1993	10.2794	131.38	29.8513	30.8532	8.89053	0			0
NCU07520		lytic polysaccharide monooxygenase 3 (LPMO3)	1	AA9	glycosylhydrolase family 61-11	endo-1,4-beta-glucanase		Y	Y	Extracellular	Mitochondria	0	-1	-1	0	0	0	0	0	0	-1	0	0.115334	0.213254	0.682447	0.479336	0.473743	0.423764	0.331691	0.267904	0.229114	0.178345	2.15189	0.248187	0.458899	1.46855	1.03148	1.01944	0.911896	0.713765	0.576501	0.49303	0.38378	0			0
NCU07760		lytic polysaccharide monooxygenase 3 (LPMO3)	1	AA9	glycosylhydrolase family 61-2	endoglucanase IV		Y	Y	Extracellular	Extracellular	1	1	1	1	1	0	1	1	1	1	0	2.46538	2.94903	12.6058	3.72861	2.24473	4.94931	18.0384	11.8265	16.8665	0.860444	2.73426	6.74098	8.06342	34.4676	10.195	6.13769	13.5327	49.3218	32.3367	46.1174	2.35268	0			0
NCU07898	NcLPMO9M	lytic polysaccharide monooxygenase 3 (LPMO3)	1	AA9	endoglucanase IV	endoglucanase IV		Y	Y	Extracellular	Extracellular	1	-1	0	1	1	1	0	1	1	1	0	0.108434	0.542213	340.878	2.76468	2.72385	2.62123	325.193	2.29655	1.96772	0.290527	3.93449	0.426631	2.13333	1341.18	10.8776	10.717	10.3132	1279.47	9.03575	7.74198	1.14308	1	Yes		0
NCU07974		lytic polysaccharide monooxygenase 3 (LPMO3)	1	AA9	endoglucanase B	endoglucanase B		Y	Y	Extracellular	Extracellular	0	1	1	0	0	0	0	0	1	1	0	2.41437	2.89665	1.42205	1.31968	1.61338	0.972698	1.67709	2.13537	1.78287	1.18563	16.6936	40.3044	48.3555	23.7391	22.0301	26.9331	16.2378	27.9966	35.647	29.7625	19.7925	0			0
NCU01050	NcLPMO9D	lytic polysaccharide monooxygenase 2 (LPMO2)	1	AA9	glycosylhydrolase family 61-4	endoglucanase II		Y	Y	Extracellular	Extracellular	1	0	1	1	1	1	0	1	0	0	0	1.29385	11.6793	10466.6	2.99609	10.4925	3.76554	7527.19	0.316714	0.15693	0.719049	0.473871	0.613117	5.53449	4959.84	1.41976	4.97212	1.78438	3566.92	0.150082	0.0743645	0.340737	1	Yes	Yes	0
NCU02240		lytic polysaccharide monooxygenase 2 (LPMO2)	1	AA9	glycosylhydrolase family 61-1	endoglucanase II		Y	Y	Extracellular	Extracellular	1	-1	-1	1	1	0	1	1	0	0	-1	0.0805886	0.252788	261.671	2.447	1.59536	2.87253	184.01	0.984475	0.586935	0.188466	9.54802	0.769461	2.41362	2498.44	23.364	15.2326	27.4269	1756.93	9.39978	5.60407	1.79948	1	Yes		0
NCU02916	NcLPMO9C	lytic polysaccharide monooxygenase 2 (LPMO2)	1	AA9	glycosylhydrolase family 61-3	endoglucanase II		Y	Y	Extracellular	Extracellular	1	0	1	1	1	0	0	1	1	1	0	0.645473	5.24958	227.002	1.60388	1.78297	1.04561	364.689	5.61168	4.60189	0.50035	5.70626	3.68324	29.9555	1295.33	9.15215	10.1741	5.9665	2081.01	32.0217	26.2596	2.85513	0			0
NCU03996	gh6-1	exo-b-1,4-glucanase or cellobiohydrolase	1	GH6	glycosylhydrolase family 6-1	exoglucanase 3		Y	Y	Extracellular	Extracellular	0	-1	-1	0	-1	0	0	0	-1	0	0	0.143972	0.169108	0.783436	0.111233	1.22862	0.702772	0.220174	0.263955	0.325615	0.281914	3.4027	0.489894	0.575424	2.66579	0.378493	4.18064	2.39132	0.749185	0.89816	1.10797	0.959268	0			0
NCU05104	gh7-4	exo-b-1,4-glucanase or cellobiohydrolase	1	GH7	glycosylhydrolase family 7-4	exoglucanase 1		Y	Y	Extracellular	Vacuole	0	-1	-1	1	0	0	0	1	0	0	0	0	0.0615163	4.91342	1.83246	0.996473	0.635237	3.84406	0.671266	0.329699	0.0677823	0.238773	0	0.0146884	1.17319	0.437542	0.23793	0.151677	0.917856	0.16028	0.0787231	0.0161846	0			0
NCU07190	gh6-3	exo-b-1,4-glucanase or cellobiohydrolase	0	GH6	glycosylhydrolase family 6-3	exoglucanase 3		N	N	Extracellular	Mitochondria	1	0	1	1	1	1	0	1	1	1	-1	0.234585	24.8293	379.512	19.7089	3.22414	1.11207	1148.66	14.0799	7.26013	0.224753	11.4203	2.67902	283.557	4334.13	225.081	36.8206	12.7001	13118	160.796	82.9126	2.56674	1	Yes	Yes	0
NCU07340	cbh-1	exo-b-1,4-glucanase or cellobiohydrolase	1	GH7	cellobiohydrolase-1	cellobiohydrolase-1		Y	Y	Extracellular	Extracellular	1	-1	1	1	1	1	1	1	0	0	-1	0.155689	1.42935	791.241	1.84942	2.00978	2.1648	518.28	0.962455	0.62255	0.125053	19.6298	3.05614	28.0579	15531.9	36.3038	39.4517	42.4946	10173.8	18.8928	12.2205	2.45478	1	Yes	Yes	1	Avicel	20018766
NCU09680	gh6-2 or cbh-2	exo-b-1,4-glucanase or cellobiohydrolase	1	GH6	glycosylhydrolase family 6-2	exoglucanase 2		Y	Y	Extracellular	Extracellular	1	0	0	1	0	1	0	1	0	0	-1	0.352948	0.839088	639.241	0.493637	2.05611	1.18085	600.595	0.572989	0.516465	0.164877	21.0707	7.43686	17.6802	13469.3	10.4013	43.3237	24.8813	12655	12.0733	10.8823	3.47407	1	Yes	Yes	1	Avicel	20018766
NCU01866		extracellular lactonase	1		lactonohydrolase	lactonohydrolase		Y	Y	Extracellular	Extracellular	1	-1	-1	1	1	0	0	0	0	1	-1	0.00383749	0.0378154	3.64618	20.4262	0.938867	0.296906	0.143997	1.34681	2.27135	0.00812895	8.62979	0.0331167	0.326339	31.4657	176.274	8.10223	2.56224	1.24267	11.6227	19.6013	0.0701512	0			0
NCU07143		extracellular lactonase	1		6-phosphogluconolactonase	6-phosphogluconolactonase		Y	Y	Extracellular	Extracellular	1	-1	0	1	1	0	0	1	0	1	1	0.115556	0.897112	75.9028	18.0071	0.965307	2.8494	20.4221	0.858029	1.51242	1.78763	22.8537	2.64089	20.5023	1734.66	411.529	22.0608	65.1193	466.721	19.6091	34.5643	40.8539	1	Yes		0
NCU07703		extracellular lactonase	1		hypothetical protein	hypothetical protein		N	Y	Extracellular	Extracellular	0	-1	0	0	0	0	0	0	0	0	-1	0.0835864	0.272263	0.835642	0.536994	0.863914	0.906007	0.58004	0.429049	0.51507	0.189081	3.87257	0.323694	1.05436	3.23609	2.07955	3.34557	3.50858	2.24625	1.66152	1.99465	0.73223	0			0
NCU00206	cdh-1	cellobiose dehydrogenase	1	AA3	cellobiose dehydrogenase-1	cellobiose dehydrogenase		Y	Y	Extracellular	Extracellular	1	0	0	1	0	0	0	1	0	0	-1	0.403333	0.685279	432.258	0.561599	1.34157	0.88899	304.99	0.492087	0.663368	0.182217	3.45398	1.3931	2.36694	1493.01	1.93975	4.63376	3.07055	1053.43	1.69966	2.29126	0.629375	1	Yes		0
NCU05923	cdh-2	cellobiose dehydrogenase	1	AA3	cellobiose dehydrogenase	cellobiose dehydrogenase		Y	Y	Extracellular	Mitochondria	0	-1	-1	0	-1	0	0	0	-1	-1	-1	0.000780357	0.0166797	0.609633	0.18031	0.456064	0.419844	0.228878	0.186292	0.136592	0.0128844	4.00836	0.00312795	0.0668584	2.44363	0.722747	1.82807	1.68288	0.917427	0.746724	0.547508	0.0516454	0			0
NCU03641	gh3-1	extracellular b-glucosidase	1	GH3	glycosylhydrolase family 3-1	beta-glucosidase 2		Y, N	Y, N	Extracellular, Extracellular	Cytoplasm, Cytoplasm	0	0	0	0	0	0	1	0	1	1	1	0.28492	0.845518	0.649443	0.335569	1.4656	3.17337	0.813577	2.72371	4.53849	2.32231	3.5741	1.01833	3.02197	2.32118	1.19936	5.23819	11.3419	2.90781	9.73481	16.2211	8.30019	0			0
NCU04952	gh3-4	extracellular b-glucosidase	1	GH3	glycosyl hydrolase family 3-4	beta-D-glucoside glucohydrolase		Y	Y	Extracellular	Mitochondria	1	-1	-1	1	-1	0	0	1	0	-1	-1	0.00529835	0.0135554	7.11107	0.195843	0.65541	1.55953	2.41998	0.345038	0.286824	0.0579221	12.7471	0.0675384	0.172792	90.6453	2.49643	8.35455	19.8795	30.8477	4.39822	3.65617	0.738337	1	Yes		1	Avicel	20018766 26288653
NCU08755	gh3-3	extracellular b-glucosidase	1	GH3	glycosylhydrolase 3-3	beta-glucosidase 1		Y	Y	Extracellular	Extracellular	1	-1	1	1	1	1	0	1	1	1	-1	0.00782729	5.94123	18.2434	6.11653	4.2001	0.996122	27.37	1.65048	2.56473	0.106592	61.8473	0.484097	367.449	1128.31	378.291	259.765	61.6075	1692.76	102.078	158.621	6.59243	1	Yes		0
NCU02855	gh11-1	endo-b-1,4-xylanase	1	GH11	glycosylhydrolase family 11-1	endo-1,4-beta-xylanase A		Y	Y	Extracellular	Extracellular	1	-1	0	1	1	0	0	1	1	1	0	0.165582	0.527935	127.966	11.5069	2.50398	1.41217	296.079	55.2047	146.07	0.404728	2.53997	0.420573	1.34094	325.031	29.2273	6.36004	3.58687	752.031	140.218	371.013	1.028	1	Yes		0
NCU04997	gh10-3	endo-b-1,4-xylanase	1	GH10	glycosylhydrolase family 10-3	xylanase		Y	Y	Extracellular	Extracellular	0	0	1	1	1	0	0	1	1	1	0	1.57625	2.30923	21.007	3.24039	1.21284	2.2076	7.80356	47.4833	149.349	1.13138	0.913093	1.43926	2.10854	19.1814	2.95878	1.10744	2.01574	7.12538	43.3567	136.369	1.03306	0			0
NCU05924	gh10-1	endo-b-1,4-xylanase	1	GH10	glycosylhydrolase family 10-1	endo-1,4-beta-xylanase		Y	Y	Extracellular	Extracellular	1	0	0	1	1	1	0	1	1	1	0	0.35581	1.16324	2658.54	323.418	10.3798	1.84893	809.603	128.2	76.5014	0.269031	1.1608	0.413023	1.35029	3086.03	375.422	12.0489	2.14624	939.785	148.814	88.8025	0.312291	1	Yes		0
NCU07130	gh10-4	endo-b-1,4-xylanase	0	GH10	glycosylhydrolase 10-4	endo-beta-1,4-D-xylanase		N	Y	Mitochondria	Peroxisome	0	0	-1	0	-1	0	0	0	0	0	0	0.142335	0.20648	0.49305	0.154086	1.66262	0.7759	0.264378	0.334756	0.964888	0.261715	0.412646	0.058734	0.0852031	0.203455	0.063583	0.686073	0.320172	0.109095	0.138136	0.398157	0.107996	0			0
NCU07225	gh11-2	endo-b-1,4-xylanase	1	GH11	glycosylhydrolase 11-2	endo-1,4-beta-xylanase 2		Y	Y	Extracellular	Extracellular	1	-1	-1	1	1	0	-1	1	-1	1	-1	0.0944395	0.12231	512.728	130.964	0.599598	0.284333	40.6105	0.349665	4.29506	0.024565	29.8675	2.82067	3.6531	15313.9	3911.57	17.9085	8.49229	1212.93	10.4436	128.282	0.733696	1	Yes		0
NCU08189	gh10-2	endo-b-1,4-xylanase	1	GH10	glycosylhydrolase family 10-2	endo-1,4-beta-xylanase		Y	Y	Extracellular	Mitochondria	1	-1	0	1	1	0	0	1	1	1	-1	0.0385488	0.18655	112.811	161.819	1.93072	0.692218	4.10357	3.26169	33.1587	0.0191098	50.4229	1.94374	9.40639	5688.24	8159.4	97.3524	34.9036	206.914	164.464	1671.96	0.963572	1	Yes		1	Xylan	22345350
NCU02343	gh51-1	a-arabinofuranosidase	1	GH51	alpha-L-arabinofuranosidase 2	alpha-L-arabinofuranosidase 2		Y	Y	Extracellular	Vacuole	1	-1	-1	1	1	1	0	0	1	1	-1	0.0328578	0.144557	9.64502	26.2876	7.37545	1.80976	1.08394	10.0782	14.5333	0.0367903	115.912	3.80861	16.7559	1117.98	3047.05	854.904	209.773	125.642	1168.19	1684.59	4.26444	1	Yes		0
NCU07326	gh43-6	a-arabinofuranosidase	1	GH43	hypothetical protein	hypothetical protein		Y	Y	Extracellular	Extracellular	1	0	0	1	0	0	0	1	1	1	-1	0.199461	0.545807	102.576	1.39955	1.23353	0.980849	64.6907	6.25847	5.43333	0.185938	7.22933	1.44197	3.94582	741.557	10.1178	8.91759	7.09088	467.67	45.2446	39.2794	1.34421	1	Yes	Yes	0
NCU09170	gh43-4	a-arabinofuranosidase	1	GH43	alpha-N-arabinofuranosidase II	alpha-N-arabinofuranosidase II		Y	Y	Extracellular	Mitochondria	1	-1	-1	0	0	1	0	0	1	1	0	0.00357981	0.131285	1.15156	1.41202	2.87372	1.36162	0.673893	14.6286	8.1569	0.500288	46.4551	0.166301	6.09888	53.4961	65.5957	133.499	63.2545	31.3058	679.574	378.93	23.2409	1	Yes		0
NCU09775	gh54-1	a-arabinofuranosidase	1	GH54	alpha-N-arabinofuranosidase	alpha-N-arabinofuranosidase		Y	Y	Extracellular	Extracellular	1	0	0	1	1	1	1	1	1	1	0	0.0440214	0.530891	16.3741	62.2249	25.8116	5.38368	8.08214	574.345	185.946	1.67293	0.779008	0.034293	0.413568	12.7556	48.4737	20.1074	4.19393	6.29605	447.42	144.853	1.30322	1	Yes		0
NCU06143	gh115-1	a-glucuronidase	1	GH115	hypothetical protein	hypothetical protein		Y	Y	Extracellular	Extracellular	1	-1	-1	1	1	1	0	0	1	1	-1	0.0717578	0.109691	28.6217	50.0943	5.18701	0.917053	1.47661	16.0751	23.1565	0.0605174	20.5434	1.47415	2.25344	587.989	1029.11	106.559	18.8394	30.3346	330.238	475.714	1.24324	1	Yes		0
NCU07351	gh67-1	a-glucuronidase	1	GH67	alpha-glucuronidase	alpha-glucuronidase		Y	Y	Extracellular	Mitochondria	1	0	1	0	1	1	1	0	1	1	1	0.89357	6.3754	3.06063	2.63744	5.61517	7.19594	1.54564	15.9425	8.38406	11.0832	6.39787	5.71695	40.789	19.5815	16.874	35.9252	46.0387	9.88882	101.998	53.6401	70.9089	0			0
NCU02550	gh36-1	a-galactosidase	0	GH36	alpha-galactosidase	alpha-galactosidase		N	N	Cytoplasm-Nucleus	Vacuole	0	-1	-1	0	0	0	0	0	0	0	-1	0.123209	0.218945	0.858551	0.620637	0.906061	0.730548	0.776949	0.580878	0.560887	0.170282	36.8897	4.54515	8.07682	31.6717	22.8951	33.4243	26.9497	28.6614	21.4284	20.691	6.28165	0			0
NCU00642	gh35-1	extracellular b-galactosidase	1	GH35	glycosylhydrolase family 35-1	beta-galactosidase		Y	Y	Extracellular	Extracellular	1	-1	0	0	1	1	0	0	1	1	0	0.0673008	0.689245	0.706259	7.36724	4.55056	1.06537	0.746146	15.6162	14.9014	0.760987	28.1646	1.8955	19.4123	19.8915	207.495	128.165	30.0056	21.0149	439.824	419.692	21.4329	1	Yes		1	Pectin	24224966
NCU04623	gh35-2	extracellular b-galactosidase	1	GH35	glycosylhydrolase family 35-2	beta-galactosidase		Y	Y	Extracellular	Extracellular	1	-1	0	1	1	1	0	1	1	1	-1	0.0464125	0.34716	2.56692	3.26626	2.90412	1.13616	6.17917	13.4413	10.1425	0.136053	7.57086	0.351382	2.6283	19.4338	24.7284	21.9867	8.60171	46.7817	101.762	76.7878	1.03004	1	Yes		0
NCU08785	ce1-3	feruloyl esterase	1	CE1	fungal cellulose binding domain-containing protein	fungal cellulose binding domain-containing protein		Y	Y	Extracellular	Extracellular	1	-1	0	1	1	0	0	1	0	1	0	0.0298727	0.30211	190.275	4.91313	2.00954	1.22661	141.506	1.70371	5.91595	0.279008	4.88915	0.146052	1.47706	930.283	24.021	9.82493	5.99707	691.842	8.32968	28.924	1.36411	1	Yes	Yes	0
NCU09026		feruloyl esterase	1		feruloyl esterase B	feruloyl esterase B		Y	Y	Extracellular	Plasma membrane	0	-1	-1	0	-1	0	0	0	-1	-1	-1	0	0.0144392	0.236613	0	0.846683	0.585262	0.0698218	0.169479	0.152626	0	0.634759	0	0.00916539	0.150192	0	0.53744	0.3715	0.04432	0.107579	0.0968809	0	0			0
NCU09491	fea-1	feruloyl esterase	1	CE1	feruloyl esterase B	feruloyl esterase B		Y	Y	Extracellular	Extracellular	1	-1	-1	1	1	1	1	1	1	1	-1	0.028053	0.125592	17.9487	8.4407	23.6859	5.77241	20.8185	37.7768	50.4139	0.119848	2.87057	0.0805279	0.360521	51.5228	24.2296	67.9918	16.5701	59.7608	108.441	144.716	0.344031	1	Yes		0
NCU09774	ce1-5	feruloyl esterase	1	CE1	cellulase	cellulase		Y	Y	Extracellular	Extracellular	0	0	0	1	0	0	0	1	1	1	0	0	0	206.935	0	4.10241	2.50477	105.002	63.9132	17.3852	3.84643	0.0119258	0	0	2.46788	0	0.0489247	0.0298715	1.25223	0.762219	0.207334	0.045872	0			0
NCU00710	ce1-4	acetyl esterase	1	CE1	acetyl xylan esterase	acetyl xylan esterase		N	Y	Extracellular	Extracellular	1	0	0	1	1	0	0	1	1	1	0	0.813677	0.766815	65.6197	10.4247	1.19973	1.15934	8.04198	4.15118	9.33485	0.61069	2.14153	1.74252	1.64216	140.527	22.3249	2.56927	2.48276	17.2222	8.88988	19.9909	1.30781	0			0
NCU03181		acetyl esterase	1	CEnc	acetylxylan esterase	acetylxylan esterase		Y	Y	Extracellular	Vacuole	1	-1	-1	1	0	0	0	1	1	0	0	0.0958513	0.260952	45.4391	1.36542	1.07069	2.22141	28.6267	1.97099	1.03345	0.270452	6.60463	0.633062	1.72349	300.109	9.0181	7.07152	14.6716	189.069	13.0177	6.82556	1.78623	0			0
NCU04494	ce1-2	acetyl esterase	1	CE1	acetyl xylan esterase	acetyl xylan esterase		Y	Y	Extracellular	Extracellular	1	0	0	0	0	0	0	0	0	1	0	0.740452	1.0698	5.00177	1.46627	0.71813	0.934089	3.31091	3.74462	3.72283	0.597801	12.4154	9.19299	13.2819	62.0988	18.2043	8.91585	11.5971	41.1062	46.4908	46.2203	7.42191	0			0
NCU04870	ce1-1	acetyl esterase	1	CE1	acetyl xylan esterase	acetyl xylan esterase		Y	Y	Extracellular	Extracellular	1	0	0	1	1	1	0	1	1	1	0	0.120654	0.235136	981.015	567.875	21.4768	1.41374	422.727	71.9144	38.4621	1.60747	1.25601	0.151542	0.295334	1232.17	713.258	26.9751	1.77568	530.95	90.3254	48.3088	2.019	1	Yes		0
NCU05159	ce5-1	acetyl esterase	1	CE5	acetylxylan esterase	acetylxylan esterase		Y	Y	Extracellular	Extracellular	1	-1	-1	1	1	0	0	1	1	1	-1	0.0836367	0.204517	171.718	47.1286	1.17188	1.35862	65.3222	2.94129	9.19243	0.0894618	16.122	1.34839	3.29722	2768.43	759.806	18.893	21.9037	1053.12	47.4194	148.2	1.4423	1	Yes	Yes	0
NCU09663	ce5-2	acetyl esterase	0	CE5	Axe2	Axe2		N	N	Extracellular	Extracellular	1	0	0	0	0	0	0	0	1	1	1	0.964875	1.22861	0.785811	0.6521	0.573177	0.818502	0.947848	2.19321	3.00564	1.84341	81.6535	78.7854	100.32	64.1643	53.2463	46.8019	66.8336	77.3951	179.083	245.422	150.521	1	Yes		0
NCU09664	ce5-3	acetyl esterase	1	CE5	acetylxylan esterase	acetylxylan esterase		Y	Y	Extracellular	Extracellular	1	0	0	1	1	0	0	1	1	1	0	0.160049	0.605603	186.28	28.8659	1.38807	0.983719	166.082	5.93657	2.91906	1.02961	0.765605	0.122535	0.463653	142.617	22.0999	1.06271	0.753141	127.154	4.54507	2.23484	0.788276	1	Yes		0
NCU00709	gh3-8	extracellular b-xylosidase	1	GH3	glycosylhydrolase family 3-8	beta-xylosidase		Y	Y	Extracellular	Extracellular	1	-1	-1	1	1	1	0	0	1	1	-1	0.11676	0.185892	18.3596	263.932	6.53474	1.0038	0.622847	32.6687	50.4143	0.0642578	1.72123	0.200971	0.319963	31.6011	454.287	11.2478	1.72777	1.07206	56.2303	86.7746	0.110603	0			0
NCU09923	gh3-7	extracellular b-xylosidase	1	GH3	glycosylhydrolase family 3-7	beta-xylosidase		Y	Y	Extracellular	Extracellular	1	-1	-1	1	1	1	0	0	1	1	0	0.0431265	0.0826572	15.7355	204.096	5.5105	1.06128	1.94767	40.6455	63.2726	0.00456167	2.03651	0.0878274	0.168332	32.0454	415.643	11.2222	2.16131	3.96645	82.7749	128.855	0.00928987	1	Yes		0
NCU09416		acetyl mannan esterase	1	CE16	cellulose-binding GDSL lipase/acylhydrolase	cellulose-binding GDSL lipase/acylhydrolase		Y	Y	Extracellular	Extracellular	1	0	0	1	1	1	1	1	1	1	0	0.447427	1.61909	817.939	50.742	7.96432	39.1616	2536.36	139.324	34.9484	0.770013	0.355644	0.159125	0.57582	290.895	18.0461	2.83246	13.9276	902.042	49.5497	12.4292	0.273851	0			0
NCU08412	gh5-7	endo-b-1,4-mannanase	0	GH5	endo-beta-1,4-mannanase	endo-beta-1,4-mannanase		N	N	Cytoplasm	Cytoplasm	1	-1	0	1	1	1	1	1	1	1	0	0.0218193	0.721307	47.8777	13.2593	2.96345	20.8232	76.4657	6.04833	2.66663	0.598895	25.7599	0.562062	18.5808	1233.33	341.558	76.3381	536.404	1969.75	155.804	68.692	15.4275	1	Yes		1	Glucomannan	Present Study
NCU00985	gh2-4	(probable) extracellular b-mannosidase	1	GH2	hydrolase	hydrolase		Y	Y	Extracellular	Extracellular	1	-1	-1	0	-1	0	1	0	-1	-1	-1	0.00209435	0.103194	1.04855	0.0334306	1.00376	5.73512	0.730937	0.0949484	0.268121	0.0545964	38.6832	0.081016	3.99186	40.5612	1.2932	38.8288	221.853	28.275	3.67291	10.3718	2.11196	1	Yes		0
NCU04885	gh31-4	a-xylosidase	0	GH31	alpha-xylosidase	alpha-xylosidase		N	N	Cytoplasm-Nucleus	Nucleus	0	-1	0	0	0	0	1	0	0	0	-1	0.133295	0.415853	0.939688	0.339665	2.01179	2.67215	0.40422	0.626446	1.19337	0.136589	28.657	3.81985	11.9171	26.9286	9.73377	57.6518	76.5758	11.5837	17.9521	34.1985	3.91424	0			0
NCU06381	gh17-1	endo-b-1,3-glucanase	1	GH17	GPI-anchored cell wall beta-1,3-endoglucanase EglC	GPI-anchored cell wall beta-1,3-endoglucanase EglC		Y	Y	Extracellular	Mitochondria	0	0	0	0	0	0	0	0	0	0	0	0.416966	0.503335	0.617446	0.297953	0.745472	1.02313	0.301063	0.314541	0.315554	0.35014	2.99403	1.24841	1.507	1.84865	0.892081	2.23197	3.06329	0.901391	0.941746	0.944778	1.04833	0			0
NCU07347	gh17-2	endo-b-1,3-glucanase	0	GH17	endo-beta-1,3-glucanase	endo-beta-1,3-glucanase		N, N	N, N	Plasma membrane, Plasma membrane	Plasma membrane, Plasma membrane	0	0	0	0	0	0	0	0	0	0	0	0.573196	0.946802	0.780226	0.913792	1.16713	0.905499	0.733286	1.00999	1.24774	0.983498	21.1148	12.1029	19.9915	16.4743	19.2945	24.6437	19.1194	15.4832	21.3257	26.3457	20.7663	0			0
NCU09175	gh17-3	endo-b-1,3-glucanase	1	GH17	GPI-anchored cell wall beta-1,3-endoglucanase EglC	GPI-anchored cell wall beta-1,3-endoglucanase EglC		Y	Y	Extracellular	Extracellular	0	0	0	0	0	0	0	0	0	0	1	0.374292	1.29638	2.13929	1.23002	1.81268	1.45637	1.71076	0.761665	1.13282	2.1884	690.613	258.491	895.3	1477.42	849.469	1251.86	1005.78	1181.47	526.016	782.338	1511.34	1	Yes		0
NCU03914	gh5-4	exo-b-1,3-glucanase	0	GH5	glucan 1,3-beta-glucosidase	glucan 1,3-beta-glucosidase		N	N	Nucleus	Plasma membrane	0	0	0	0	0	0	0	0	0	0	0	0.454637	0.474101	0.573461	0.602104	1.18073	1.21666	0.48383	0.517982	0.713661	0.398984	13.0734	5.94363	6.19809	7.49706	7.87152	15.4361	15.9058	6.32529	6.77177	9.32995	5.21607	0			0
NCU09326	gh17-4	exo-b-1,3-glucanase	1	GH17	hypothetical protein	hypothetical protein		Y	Y	Extracellular	Extracellular	0	1	1	0	1	0	0	0	1	1	1	2.13977	3.45293	1.85184	2.25551	2.15841	1.43727	1.73863	3.01199	4.40185	5.54534	497.253	1064.01	1716.98	920.834	1121.56	1073.28	714.688	864.539	1497.72	2188.84	2757.44	1	Yes		0
NCU02369	gh28-1	endogalacturonase	1	GH28	glycosylhydrolase family 28-1	polygalacturonase		Y	Y	Extracellular	Extracellular	1	0	0	0	0	0	0	0	1	1	0	2.67583	2.35946	0.972637	2.19545	1.77917	0.962296	1.60523	27.3759	15.1811	3.91296	3.5075	9.38547	8.27582	3.41152	7.70055	6.24043	3.37525	5.63033	96.021	53.2477	13.7247	1	Yes		1	Pectin	24224966
NCU06961	gh28-2	exogalacturonase	1	GH28	glycosylhydrolase family 28-2	exopolygalacturonase		Y	Y	Extracellular	Extracellular	1	-1	-1	0	1	1	0	0	1	1	-1	0.00178242	0.0326018	0.765982	4.81671	29.5968	0.522289	1.0843	52.636	25.4749	0.024547	89.6216	0.159743	2.92183	68.6486	431.681	2652.52	46.8084	97.1769	4717.33	2283.11	2.19994	1	Yes		1	Pectin	24224966
NCU06326	pl1-1	pectate lyase	1	PL1	pectate lyase 1	pectate lyase 1		Y	Y	Extracellular	Extracellular	1	0	0	1	1	1	1	1	1	1	0	0.660811	0.487589	3.98497	16.3735	25.1593	2.64433	9.28513	314.277	88.5366	0.675015	4.83744	3.19663	2.35868	19.277	79.2057	121.706	12.7918	44.9162	1520.3	428.29	3.26534	1	Yes		0
NCU08176	pl3-1	pectate lyase	1	PL3	pectate lyase A	pectate lyase A		Y	Y	Extracellular	Extracellular	1	0	0	0	0	0	0	0	1	1	0	0.105672	0.657343	86.2155	14.4201	15.8902	5.87105	221.495	593.142	166.471	0.38088	1.27947	0.135204	0.841048	110.31	18.45	20.3309	7.51182	283.395	758.906	212.994	0.487324	1	Yes		0
NCU10045	ce8-1	pectin methyl esterase	1	CE8	pectinesterase	pectinesterase		Y, Y	Y, Y	Extracellular, Extracellular	Extracellular, Extracellular	1	-1	0	1	1	1	1	1	1	1	-1	0.170917	0.341858	13.3367	11.3273	22.5078	2.7547	20.0004	79.2378	22.5848	0.217842	19.0856	3.26204	6.52455	254.538	216.188	429.575	52.5751	381.72	1512.3	431.043	4.15763	1	Yes		1	Pectin	24224966
NCU05598	pl4-1	rhamnogalacturonan lyase	1	PL4	ascus development-1	ascus development-1		Y	Y	Extracellular	Plasma membrane	1	1	1	1	1	1	0	1	1	1	1	1.92545	6.35476	10.3911	4.16915	3.47488	1.77401	26.4411	37.4871	14.8396	10.0654	4.88637	9.40846	31.0517	50.7746	20.372	16.9796	8.66845	129.201	183.176	72.5119	49.1831	1	Yes		0
NCU00972	gh53-1	endo-b-1,4-galactanase	1	GH53	arabinogalactan endo-1,4-beta-galactosidase	arabinogalactan endo-1,4-beta-galactosidase		Y	Y	Extracellular	Extracellular	1	0	1	1	1	0	0	1	1	1	0	0.711872	1.9338	16.3878	23.2663	1.80245	1.30581	88.7212	52.8832	10.4552	1.25843	6.9507	4.94801	13.4413	113.907	161.717	12.5283	9.07628	616.675	367.576	72.6707	8.74696	0			0
NCU05882	gh5-5	endo-b-1,6-galactanase	1	GH5	cellulase	cellulase		Y	Y	Extracellular	Extracellular	1	-1	0	0	0	0	0	0	1	1	0	0.146124	0.502271	0.738187	0.612595	1.88127	0.85994	0.633555	4.0775	2.06	0.49119	25.5213	3.72928	12.8186	18.8395	15.6342	48.0125	21.9468	16.1691	104.063	52.5739	12.5358	1	Yes		0
NCU09702		endo-b-1,6-galactanase	1	GH30	endo-beta-1,6-galactanase	endo-beta-1,6-galactanase		Y	Y	Extracellular	Extracellular	0	0	0	0	0	0	0	0	-1	0	0	0.280796	0.293632	0.718784	0.546373	0.627018	0.482831	0.360324	0.340219	0.513404	0.441931	7.41043	2.08082	2.17594	5.3265	4.04886	4.64648	3.57799	2.67015	2.52117	3.80455	3.2749	0			0
NCU00852	gh43-1	endoarabinanase	1	GH43	endo-arabinase	endo-arabinase		Y	Y	Extracellular	Extracellular	0	0	0	0	0	0	0	0	0	0	0	0	0.294266	0.908179	0.706984	0.316066	0	0.747463	0.100249	0.0338606	0	0.179665	0	0.0528693	0.163168	0.12702	0.056786	0	0.134293	0.0180112	0.00608355	0	0			0
NCU05965	gh43-7	endoarabinanase	1	GH43	arabinosidase	arabinosidase		Y	Y	Extracellular	Vacuole	1	0	0	0	1	1	0	0	1	1	0	0.382534	0.52896	0.897925	52.2262	11.3263	1.11399	1.62578	65.6731	23.4895	0.366	6.84171	2.61719	3.61899	6.14334	357.316	77.4912	7.62162	11.1231	449.316	160.708	2.50406	1	Yes		1	Pectin	24224966
NCU09924	gh93-1	exoarabinanase	1	GH93	BNR/Asp-box repeat protein	BNR/Asp-box repeat protein		Y	Y	Extracellular	Mitochondria	1	-1	-1	1	1	1	0	0	1	1	-1	0.0557278	0.0482831	6.72651	141.998	3.22829	0.58145	1.17373	28.5864	26.4571	0.084951	2.64372	0.147329	0.127647	17.783	375.402	8.53469	1.53719	3.10302	75.5743	69.9451	0.224587	0			0
NCU00937	gh79-1	extracellular b-glucuronidase	1	GH79	beta-glucuronidase	beta-glucuronidase		Y	Y	Extracellular	Extracellular	0	0	-1	0	0	0	0	0	0	0	-1	0.00784632	0.0173979	0.458515	1.02677	1.92184	0.412043	0.122091	1.37638	0.366175	0.00913823	141.271	1.10845	2.45781	64.7747	145.053	271.499	58.2096	17.2478	194.442	51.7298	1.29096	1	Yes		0
NCU08179	gh79-2	extracellular b-glucuronidase	1	GH79	hypothetical protein	hypothetical protein		Y	Y	Extracellular	Extracellular	1	0	0	0	0	0	0	0	1	1	0	0.278875	0.361491	1.72583	0.875224	1.35697	1.27723	1.12108	6.54605	2.37349	0.234624	1.7865	0.498212	0.645804	3.0832	1.56359	2.42423	2.28178	2.00281	11.6945	4.24024	0.419157	0			0
NCU09976	ce12-1	rhamnogalacturonan acetyl esterase	1	CE12	rhamnogalacturonan acetylesterase	rhamnogalacturonan acetylesterase		Y	Y	Extracellular	Extracellular	1	0	0	1	1	0	0	1	1	1	0	0.37822	0.836919	9.78374	3.1307	0.925152	0.962932	12.7388	57.172	22.1064	0.544022	1.18703	0.44896	0.99345	11.6136	3.71624	1.09819	1.14303	15.1214	67.865	26.2411	0.645771	1	Yes		0
NCU00743	gh13-7	amylo-a-1,6-glucosidase	0	GH13	glycogen debranching enzyme	glycogen debranching enzyme		N	N	Cytoplasm	Cytoplasm	0	0	0	0	0	0	0	0	0	0	0	0.777192	1.58081	0.995224	1.24306	0.88537	0.921973	0.502522	0.855731	0.929938	0.819041	74.3075	57.7511	117.466	73.9526	92.3684	65.7896	68.5095	37.3411	63.5872	69.1013	60.8608	0			0
NCU02478	gh13-8	a-amylase	1	GH13	alpha-1,3-glucan synthase Ags2	alpha-1,3-glucan synthase Ags2		Y	Y	Plasma membrane	Plasma membrane	1	1	1	0	0	0	0	0	0	1	1	3.59286	5.18096	1.93894	1.51562	0.570579	0.988741	0.874439	1.13506	2.15321	10.5554	3.5699	12.8261	18.4955	6.92183	5.41061	2.03691	3.52971	3.12166	4.05204	7.68673	37.6816	0			0
NCU05429	gh13-9	a-amylase	0	GH13	1,4-alpha-glucan branching enzyme	1,4-alpha-glucan branching enzyme		N, N	N, N	Cytoplasm, Cytoplasm	Vacuole, Vacuole	0	0	0	0	0	0	0	0	0	0	-1	0.532128	1.02343	0.577351	0.564427	0.963283	0.866326	0.333042	0.773891	0.387896	0.175419	279.189	148.564	285.731	161.19	157.582	268.938	241.869	92.9818	216.062	108.296	48.9751	0			0
NCU05873	gh13-6	a-amylase	0	GH13	glycosylhydrolase 13-6	Amy1		N	N	Cytoplasm	Extracellular	1	0	0	0	0	0	0	0	0	1	1	0.526652	1.4009	0.749123	0.452859	0.562253	0.76412	0.48159	0.972316	1.83992	1.36683	11.6933	6.15831	16.3811	8.75973	5.29542	6.5746	8.93509	5.63138	11.3696	21.5147	15.9827	0			0
NCU08131	gh13-1	a-amylase	1	GH13	glycosylhydrolase family 13-1	alpha-amylase		Y	Y	Extracellular	Extracellular	0	-1	0	0	0	0	0	0	0	0	0	0.134673	0.328387	1.04208	0.548948	1.61674	1.3938	1.33742	0.762729	1.10016	0.513834	988.653	133.144	324.661	1030.25	542.719	1598.39	1377.98	1322.24	754.074	1087.68	508.003	0			0
NCU08132	gh13-10	a-amylase	1	GH13	alpha-1,3-glucan synthase Ags2	alpha-1,3-glucan synthase Ags2		Y	Y	Plasma membrane	Extracellular	1	1	1	0	0	0	0	0	0	1	1	1.16767	1.73411	1.21333	1.32808	1.66429	1.57471	1.73342	1.07864	2.30513	2.55087	36.992	43.1943	64.1481	44.8836	49.1285	61.5656	58.2517	64.1227	39.9012	85.2715	94.3619	0			0
NCU09486	gh13-3	a-amylase	0	GH13	glycosyl hydrolase family 13-3	glucan 1,4-alpha-maltohexaosidase		N	N	Cytoplasm	Extracellular	0	-1	-1	0	-1	0	0	0	-1	-1	-1	0.0873392	0.228717	0.512094	0.25944	0.903869	1.06395	0.413944	0.233219	0.257392	0.148696	15.3999	1.34501	3.52221	7.88618	3.99534	13.9195	16.3847	6.37468	3.59154	3.9638	2.2899	0			0
NCU09805	gh13-2	a-amylase	1	GH13	glycosylhydrolase family 13-2	alpha-amylase		Y	Y	Extracellular	Extracellular	0	0	0	0	0	0	0	0	0	0	0	0.547443	0.752364	0.539688	1.44592	0.581432	0.519483	1.64057	0.750007	0.525658	0.87683	2.28829	1.25271	1.72163	1.23496	3.30869	1.33049	1.18873	3.75411	1.71624	1.20286	2.00644	0			0
NCU08746		starch-active lytic polysaccharide monooxygenase (LPMO)	1	AA13	starch binding domain-containing protein	starch binding domain-containing protein		Y	Y	Extracellular	Extracellular	1	-1	1	1	1	0	0	1	1	1	1	0.0532631	2.82265	5.52441	10.5771	0.903455	0.734485	90.2495	8.4104	2.41469	1.36697	10.1804	0.542238	28.7356	56.2405	107.679	9.1975	7.47732	918.772	85.6209	24.5825	13.9162	1	Yes		0
NCU01517	gla-1	extracellular a-glucosidase	0	GH15	glucoamylase precursor	glucoamylase precursor		N	N	Extracellular	Extracellular	1	-1	1	0	1	0	0	1	1	1	1	0.0408227	5.34064	0.439161	8.8585	1.07715	1.51821	8.65202	14.2695	8.14047	2.81745	114.822	4.68734	613.222	50.4252	1017.15	123.681	174.324	993.442	1638.45	934.703	323.504	1	Yes		0
NCU02583	gla-2	extracellular a-glucosidase	1	GH31	glucoamylase-2	alpha-glucosidase		N, Y	N, Y	Plasma membrane, Extracellular	Plasma membrane Endoplasmic Reticulum	0	-1	-1	0	0	0	0	0	0	0	-1	0.0319737	0.223364	0.49585	1.45202	1.06143	1.08085	0.447813	1.14001	0.763998	0.0184901	110.677	3.53876	24.7213	54.8793	160.706	117.476	119.626	49.5626	126.173	84.5571	2.04643	1	Yes		0
NCU03098	gh15-1	extracellular a-glucosidase	0	GH15	glycosyl hydrolase	glycosyl hydrolase		N	N	Plasma membrane	Endoplasmic Reticulum	0	0	-1	0	-1	0	0	0	-1	-1	-1	0.0022421	0.0187333	0.167836	0.0517197	0.707871	0.505062	0.272817	0.036881	0.0348314	0.0101416	47.6602	0.106859	0.892834	7.99908	2.46497	33.7373	24.0713	13.0025	1.75776	1.66007	0.483349	0			0
NCU04203	gh31-2	extracellular a-glucosidase	0	GH31	glycosylhydrolase family 31-2	glucosidase II alpha subunit		Y	Y	Cytoplasm	Endoplasmic Reticulum	0	0	0	0	0	0	0	0	0	1	0	0.781818	0.950815	1.38689	1.09268	1.41192	1.26694	1.45438	1.24477	1.43278	0.402266	83.7835	65.5035	79.6626	116.199	91.5488	118.295	106.148	121.853	104.291	120.043	33.7033	0			0
NCU04674	gh31-3	extracellular a-glucosidase	1	GH31	glycosylhydrolase family 31-3	alpha-glucosidase		Y	Y	Extracellular	Extracellular	0	-1	0	0	1	0	0	0	1	0	0	0.0274608	0.834622	0.893759	5.49655	1.432	0.7172	0.939751	2.17848	1.45047	0.303818	85.7536	2.35486	71.5719	76.6431	471.349	122.8	61.5025	80.5871	186.813	124.383	26.0535	1	Yes		0
NCU09281	gh31-1	extracellular a-glucosidase	1	GH31	glycosylhydrolase 31-1	alpha-glucosidase		Y	Y	Extracellular	Extracellular	0	-1	-1	0	-1	0	0	0	0	0	-1	0.0193777	0.0593259	0.19315	0.0413332	1.2091	1.59469	0.439074	0.106491	0.0910959	0.0162412	77.6821	1.5053	4.60856	15.0043	3.21085	93.9254	123.879	34.1082	8.27247	7.07652	1.26165	1	Yes		0
NCU08398		extracellular aldose 1-epimerase	1		aldose 1-epimerase	aldose 1-epimerase		Y	Y	Extracellular	Vacuole	0	-1	-1	1	0	0	0	1	1	0	-1	0.0102642	0.0630639	59.6675	1.14474	2.04956	1.48132	55.5851	3.95189	0.885147	0.0413356	11.4426	0.117449	0.721618	682.753	13.0988	23.4524	16.9502	636.04	45.2201	10.1284	0.472988	1	Yes		0
NCU08516		extracellular aldose 1-epimerase	1		aldose 1-epimerase	aldose 1-epimerase		Y	Y	Extracellular	Extracellular	0	-1	-1	0	0	0	0	0	0	0	-1	0.00638432	0.0433301	0.514138	1.09477	2.17713	1.06303	0.234347	1.54337	1.12729	0.0215243	345.307	2.20455	14.9622	177.535	378.031	751.78	367.071	80.9218	532.935	389.262	7.43248	1	Yes		0
NCU00801	cdt-1	cellodextrin transporter	1		cellodextrin transport-1	MFS lactose permease	The Major Facilitator Superfamily (MFS)	N	N	Plasma membrane	Plasma membrane	1	-1	1	1	0	0	0	1	1	1	0	0.0740334	2.80154	38.4034	0.637659	1.90196	3.01798	39.7434	2.40577	2.29354	0.586506	49.5395	3.66758	138.787	1902.49	31.5893	94.222	149.509	1968.87	119.181	113.621	29.0552	1		Yes	1	Avicel; Cellobiose; Xylan; Xylodextrin	24586693
NCU00809		cellobiose transporter	1		MFS monosaccharide transporter	MFS monosaccharide transporter	The Major Facilitator Superfamily (MFS)	N	N	Plasma membrane	Plasma membrane	0	0	0	0	1	0	0	0	1	1	0	0.407756	0.764527	1.90321	4.41719	1.51544	0.996223	1.6139	18.1045	6.00836	0.994558	12.2314	4.98742	9.35121	23.2788	54.0283	18.5359	12.1852	19.7402	221.443	73.4904	12.1648	0			0
NCU08114	cdt-2	cellodextrin and xylodextrin transporter	1		cellodextrin transport-2	hexose transporter	The Major Facilitator Superfamily (MFS)	N	N	Plasma membrane	Plasma membrane	1	-1	1	1	1	1	0	1	0	1	-1	0.0269994	3.07949	94.2224	19.6397	3.35171	1.04947	67.1481	0.957772	7.21644	0.0318083	93.251	2.51772	287.166	8786.33	1831.42	312.55	97.864	6261.63	89.3132	672.941	2.96616	1		Yes	1	Avicel; Xylan; Xylodextrin	20829451 24586693
NCU05853	cdt-3	cellobionic acid transporter	1		MFS sugar transporter	MFS sugar transporter	The Major Facilitator Superfamily (MFS)	N	N	Plasma membrane	Plasma membrane	1	-1	-1	1	0	1	0	1	0	0	-1	0.00667384	0.175355	12.7964	1.08266	3.12008	0.612913	12.2122	0.319593	0.602742	0.0100054	321.456	2.14535	56.3688	4113.48	348.029	1002.97	197.025	3925.69	102.735	193.755	3.2163	1		Yes	0
NCU01633	glt-1	glucose transporter	1		hexose transporter HXT13	hexose transporter HXT13	The Major Facilitator Superfamily (MFS)	N	N	Plasma membrane	Plasma membrane	1	1	1	1	0	0	1	0	1	1	1	28.2259	181.334	4.38631	0.345452	1.66112	4.10144	0.611849	7.37537	21.7998	169.164	13.3984	378.181	2429.58	58.7693	4.62849	22.2562	54.9526	8.19778	98.8178	292.082	2266.52	0			0
NCU04963	an29-2	glucose and xylose transporter	1		high-affinity glucose transporter	high-affinity glucose transporter	The Major Facilitator Superfamily (MFS)	N	N	Plasma membrane	Plasma membrane	1	-1	1	0	1	0	0	1	1	1	1	0.0299552	3.4707	1.50783	5.16511	0.76687	1.04149	3.86406	5.87482	4.49753	1.95575	254.13	7.61252	882.011	383.186	1312.61	194.885	264.675	981.974	1492.97	1142.96	497.016	0			0
NCU06138	xy31	glucose and xylose transporter	1		quinate permease	quinate permease	The Major Facilitator Superfamily (MFS)	N	N	Plasma membrane	Plasma membrane	1	-1	-1	1	1	0	0	0	0	1	-1	0.0420108	0.0322881	24.9333	38.9378	1.27942	0.354275	1.07762	1.11109	5.24219	0.0219337	22.5026	0.945352	0.726567	561.065	876.203	28.7904	7.97212	24.2493	25.0023	117.963	0.493565	1		Yes	0
NCU10021	hgt-1	glucose transporter	1		high affinity glucose transporter-1	MFS monosaccharide transporter	The Major Facilitator Superfamily (MFS)	N	N	Plasma membrane	Plasma membrane	1	-1	1	0	1	0	0	1	1	1	0	0.0424588	3.33762	1.60601	7.6365	0.564711	0.845013	6.92661	5.53952	5.05238	0.63522	463.861	19.695	1548.19	744.965	3542.27	261.947	391.968	3212.98	2569.57	2343.6	294.654	0			0
NCU01132	xat-1	xylose and arabinose transporter	1		MFS monosaccharide transporter	MFS monosaccharide transporter	The Major Facilitator Superfamily (MFS)	N	N	Plasma membrane	Endoplasmic Reticulum	1	-1	-1	0	1	1	0	-1	1	1	-1	0.00377496	0.0214169	0.529264	3.57472	3.13322	1.11112	0.155049	5.67361	5.20502	0.0122908	48.055	0.181406	1.02919	25.4338	171.783	150.567	53.3947	7.4509	272.645	250.127	0.590635	0			0
NCU02188	lat-1	xylose and arabinose transporter	1		sugar transporter	sugar transporter	The Major Facilitator Superfamily (MFS)	N	N	Plasma membrane	Plasma membrane	1	-1	-1	0	1	1	0	0	1	1	-1	0.000876234	0.0685536	0.857992	8.77916	15.9283	1.00936	1.07299	8.06932	6.95306	0.0121341	190.524	0.166944	13.0611	163.468	1672.64	3034.72	192.307	204.43	1537.4	1324.72	2.31184	0			1	L-arabinose	24502254
NCU00988	gat-1	galacturonic acid and glucuronic acid transporter	1		MFS quinate transporter	MFS quinate transporter	The Major Facilitator Superfamily (MFS)	N	N	Plasma membrane	Plasma membrane	1	-1	-1	0	1	1	0	0	1	1	-1	0.00115137	0.0344218	0.925156	1.92605	6.03588	0.901295	0.709516	5.79372	4.34512	0.00418575	211.182	0.243149	7.26925	195.376	406.747	1274.67	190.337	149.837	1223.53	917.61	0.883953	0			1	Pectin	24502254
NCU00821	an25	xylose transporter	1		sugar transporter	sugar transporter	The Major Facilitator Superfamily (MFS)	N	Y	Plasma membrane	Plasma membrane	1	-1	0	0	0	0	0	0	0	1	-1	0.164623	0.492861	0.577988	0.729458	1.67676	1.78362	0.580159	1.06086	1.7026	0.0340601	275.84	45.4095	135.951	159.432	201.214	462.518	491.994	160.031	292.629	469.646	9.39514	0			0
NCU04537		xylose transporter	1		monosaccharide transporter	monosaccharide transporter	The Major Facilitator Superfamily (MFS)	N	N	Plasma membrane	Plasma membrane	1	0	1	0	1	0	0	0	1	1	0	0.400628	4.02477	1.8207	12.0824	0.744373	0.523984	0.353516	23.5177	38.8114	0.641098	4.2741	1.71233	17.2023	7.78184	51.6416	3.18153	2.23956	1.51096	100.517	165.884	2.74012	0			0
NCU05627	xyt-1	xylose transporter	1		high affinity glucose transporter ght1	high affinity glucose transporter ght1	The Major Facilitator Superfamily (MFS)	N	N	Plasma membrane	Plasma membrane	1	0	1	0	1	0	1	1	1	1	1	0.245212	14.0528	0.711969	10.0516	1.00205	3.4378	6.00552	7.6291	9.94435	8.12705	45.7634	11.2218	643.104	32.5822	459.994	45.8573	157.325	274.833	349.134	455.087	371.922	0			0
NCU09287		xylose transporter	1		sugar transporter	sugar transporter	The Major Facilitator Superfamily (MFS)	N	N	Plasma membrane	Plasma membrane	0	-1	-1	0	0	0	0	0	0	0	-1	0.000872969	0.122332	0.447931	0.393317	1.45321	0.580505	0.313319	0.498317	0.402244	0.0560488	732.644	0.639575	89.6255	328.174	288.161	1064.68	425.303	229.551	365.089	294.702	41.0638	0			0
NCU05897		fucose transporter	1		l-fucose permease	l-fucose permease	The Major Facilitator Superfamily (MFS)	N	N	Plasma membrane	Plasma membrane	1	-1	1	0	1	0	0	1	1	1	1	0.00442909	4.19866	1.95626	8.58549	0.910075	3.32444	4.16644	4.32294	4.51818	2.16087	291.674	1.29185	1224.64	570.589	2504.16	265.445	969.652	1215.24	1260.89	1317.84	630.268	0			0
NCU01868		maltose transporter	1		MFS maltose permease MalP	MFS maltose permease MalP	The Major Facilitator Superfamily (MFS)	N	N	Plasma membrane	Endoplasmic Reticulum	0	-1	-1	0	-1	0	0	0	-1	-1	-1	0.00722659	0.0457473	0.384606	0.101129	0.59702	0.398992	0.220289	0.124453	0.125145	0.0589253	40.4367	0.29222	1.84987	15.5522	4.08931	24.1415	16.1339	8.90777	5.03245	5.06047	2.38274	0			0
NCU06522		maltose transporter	1		MFS maltose permease	MFS maltose permease	The Major Facilitator Superfamily (MFS)	N	N	Plasma membrane	Plasma membrane	0	-1	-1	0	0	0	0	-1	-1	-1	-1	0.0798775	0.0866594	0.463997	0.310328	0.729596	0.846799	0.186807	0.204825	0.207097	0.214083	16.8411	1.34523	1.45944	7.81423	5.22627	12.2872	14.261	3.14604	3.44948	3.48774	3.6054	0			0
NCU12154		maltose transporter	1		maltose permease MAL61	maltose permease MAL61		N	N	Mitochondria	Plasma membrane	0	0	0	0	0	0	0	0	0	0	0	0.299973	0.450969	0.687314	1.11629	0.909171	0.995047	1.08691	0.443525	0.532228	0.753039	2.33484	0.700389	1.05294	1.60477	2.60635	2.12277	2.32327	2.53775	1.03556	1.24266	1.75822	0			0
NCU00130	gh1-1	intracellular b-glucosidase	1	GH1	glycosylhydrolase family 1-1	beta-glucosidase		N, N	N, N	Cytoplasm, Cytoplasm	Cytoplasm, Cytoplasm	1	-1	1	1	1	1	0	1	1	1	-1	0.0781129	9.79814	179.553	7.63519	3.00099	1.41924	380.526	2.23116	2.71522	0.0512523	31.1732	2.43503	305.439	5597.24	238.013	93.5502	44.2421	11862.2	69.5524	84.6422	1.5977	1		Yes	0
NCU05577	gh3-5	intracellular b-glucosidase	1	GH3	glycosylhydrolase family 3-5	beta-glucosidase		N	N	Cytoplasm	Cytoplasm	0	0	0	0	0	0	0	0	0	0	0	0.464251	1.02261	1.3525	0.730222	2.1664	1.55635	2.23826	0.877163	0.840543	0.286123	23.0211	10.6875	23.5415	31.1359	16.8105	49.8729	35.8288	51.527	20.1932	19.3502	6.58686	0			0
NCU07487	gh3-6	intracellular b-glucosidase	1	GH3	glycosylhydrolase family 3-6	periplasmic beta-glucosidase		N	N	Cytoplasm	Cytoplasm	1	0	1	1	0	0	0	1	0	0	0	0.227104	9.47105	117.852	0.673971	2.04248	1.10673	511.484	0.682502	0.629804	0.321982	1.09664	0.24905	10.3863	129.241	0.739101	2.23986	1.21368	560.912	0.748456	0.690666	0.353097	0			0
NCU08054	gh3-2	intracellular b-glucosidase	0	GH3	glycosylhydrolase 3-2	beta-glucosidase 1		N	N	Plasma membrane	Plasma membrane	0	0	0	0	0	0	0	0	0	0	0	0.337854	0.62579	0.732049	0.69455	1.71869	1.37726	0.525023	0.723708	0.940338	0.336828	28.3087	9.5642	17.7153	20.7234	19.6618	48.6539	38.9884	14.8627	20.4872	26.6197	9.53517	0			0
NCU09425	gh94-1	cellobiose phosphorylase	1	GH94	NdvB protein	NdvB protein		N	N	Mitochondria	Mitochondria	1	-1	0	0	0	0	0	1	0	0	-1	0.03317	0.311133	3.39136	0.583512	0.811239	0.713147	3.12775	0.700736	0.904502	0.051726	127.968	4.24469	39.815	433.984	74.6707	103.812	91.2598	400.251	89.6716	115.747	6.61925	0			0
NCU10058	rg-1	phosphoglucomutase	1		phosphoglucomutase 2	phosphoglucomutase 2		N	N	Cytoplasm	Endoplasmic Reticulum	0	0	0	0	0	0	0	0	0	0	0	0.525371	0.598079	0.738254	0.882839	0.781159	0.706377	0.451998	0.754861	0.586364	0.387601	532.841	279.939	318.681	393.372	470.413	416.234	376.387	240.843	402.221	312.439	206.53	0			0
NCU00575		hexokinase	1		glucokinase	glucokinase		N	N	Cytoplasm	Mitochondria	1	1	1	0	1	0	0	1	0	0	1	1.66907	3.49002	2.05303	1.83912	0.960596	1.22728	3.44535	1.32703	1.32053	2.24028	98.9485	165.152	345.332	203.144	181.978	95.0495	121.437	340.912	131.308	130.664	221.672	0			0
NCU02542		hexokinase	1		embden-meyerhof pathway-1	hexokinase		N, N	N, N	Cytoplasm, Cytoplasm	Cytoplasm, Cytoplasm	0	0	0	0	0	0	0	0	0	0	0	0.714659	0.743036	0.60367	0.608026	0.727134	0.806695	0.387436	0.595899	0.565309	0.593818	307.133	219.495	228.211	185.407	186.745	223.327	247.763	118.994	183.02	173.625	182.381	0			0
NCU04728		hexokinase	1		hexokinase-1	hexokinase-1		N	Y	Mitochondria	Mitochondria	0	-1	0	0	0	0	0	0	0	0	0	0.0778268	0.478767	0.498899	0.384671	1.0419	1.20576	0.505188	0.372294	0.440745	0.340094	19.4627	1.51472	9.31809	9.70993	7.48673	20.2781	23.4673	9.83231	7.24585	8.57809	6.61916	0			0
NCU06996		hexokinase	1		hexokinase-2	hexokinase-2		N	N	Extracellular	Cytoplasm	0	-1	0	0	0	0	0	0	0	0	0	0.182789	0.356858	0.836481	0.543288	1.03477	0.875068	0.670325	0.646398	0.645494	0.477319	18.4716	3.37641	6.59174	15.4511	10.0354	19.1138	16.1639	12.382	11.94	11.9233	8.81685	0			0
NCU07626		hexokinase	1		thermoresistant gluconokinase	thermoresistant gluconokinase		N	N	Cytoplasm	Cytoplasm	0	-1	0	0	0	0	0	0	0	0	-1	0.0174599	0.295362	0.305653	0.661839	0.811322	0.803769	0.188977	0.771597	0.58282	0.142839	11.6886	0.204082	3.45237	3.57265	7.73596	9.4832	9.39492	2.20887	9.01888	6.81234	1.66959	0			0
NCU04923	gcy-1	glyceraldehyde reductase	1		glycerol dehydrogenase-1	Gld1		N	N	Cytoplasm	Peroxisome	1	1	1	0	0	0	0	0	0	1	1	3.26937	5.5104	0.850794	0.922064	0.943135	1.83882	0.832948	0.986942	2.36377	2.25057	36.1184	118.084	199.027	30.7293	33.3035	34.0646	66.4152	30.0848	35.6468	85.3755	81.2871	0			0
NCU01900	gh43-2	intracellular b-xylosidase	1	GH43	xylosidase/arabinosidase	xylosidase/arabinosidase		N	N	Cytoplasm	Peroxisome	1	-1	0	1	1	0	0	1	1	1	-1	0.0986685	0.845044	51.2461	87.1016	0.706379	0.705864	4.37763	1.47274	11.568	0.0599733	26.1859	2.58372	22.1282	1341.92	2280.83	18.4971	18.4837	114.632	38.5649	302.917	1.57045	1		Yes	0
NCU09652	gh43-5	intracellular b-xylosidase	1	GH43	beta-xylosidase	beta-xylosidase		N	N	Cytoplasm	Cytoplasm	1	-1	-1	1	1	0	0	0	0	1	-1	0.0352528	0.241611	7.22489	15.311	1.02833	0.563662	0.88604	0.873027	3.28966	0.03641	50.3962	1.77661	12.1763	364.107	771.615	51.8237	28.4064	44.653	43.9973	165.786	1.83493	1			0
NCU08384		D-xylose reductase, L-arabinose reductase, D-galactose reductase	1		xylose reductase	xylose reductase		N	N	Cytoplasm	Cytoplasm	1	0	1	1	1	0	0	1	1	1	0	0.414371	3.97049	216.621	648.411	1.21996	1.54976	4.11419	41.3461	175.125	0.177565	10.6128	4.39764	42.1381	2298.96	6881.46	12.9472	16.4473	43.6631	438.798	1858.57	1.88446	1	Yes	Yes	1	L-arabinose, D-xylose	24581151
NCU00891		xylitol dehydrogenase, D-sorbitol dehydrogenase	1		xylitol dehydrogenase	xylitol dehydrogenase		N	N	Cytoplasm	Extracellular	1	0	0	1	1	0	0	1	1	1	-1	0.274917	0.665266	18.2006	47.104	1.4072	2.30539	6.57486	2.66577	4.95828	0.225386	30.0465	8.26029	19.9889	546.866	1415.31	42.2813	69.2689	197.552	80.0971	148.979	6.77205	1		Yes	1	L-arabinose, D-xylose	24581151
NCU11353		xylulokinase	1		D-xylulose kinase	D-xylulose kinase		N	N	Cytoplasm	Cytoplasm	1	-1	0	1	1	0	0	0	0	1	0	0.199579	0.625433	5.97095	18.2766	1.01386	1.35619	0.72146	0.597632	3.63583	0.821703	30.3121	6.04966	18.9582	180.992	554.002	30.7322	41.109	21.869	18.1155	110.21	24.9075	1		Yes	0
NCU00519		ribulose-phosphate 3-epimerase	1		ribulose-phosphate 3-epimerase	ribulose-phosphate 3-epimerase		N	N	Cytoplasm	Cytoplasm	0	0	0	0	0	0	0	0	0	0	0	0.605772	0.605538	0.610618	0.865804	0.659546	0.616923	0.437708	0.752359	0.561092	0.330877	135.364	82	81.9682	82.6559	117.199	89.279	83.5094	59.2501	101.843	75.9518	44.789	0			0
NCU00643		L-arabitol dehydrogenase, galactitol dehydrogenase	1		L-arabinitol 4-dehydrogenase	L-arabinitol 4-dehydrogenase		N	N	Cytoplasm	Cytoplasm	1	-1	0	0	1	1	0	0	1	1	-1	0.142023	0.642579	0.79014	37.41	8.81337	0.682388	0.558462	31.7524	23.0281	0.172225	26.9182	3.82302	17.2971	21.2692	1007.01	237.24	18.3687	15.0328	854.718	619.877	4.63598	0			1	L-arabinose	24581151
NCU09041		L-xylulose reductase, L-sorbitol reductase	1		L-xylulose reductase	L-xylulose reductase		N	N	Mitochondria	Mitochondria	0	-1	0	0	0	0	0	0	0	0	0	0.100989	0.868154	0.668746	0.779871	1.63609	1.21176	0.391465	0.41723	0.424127	0.515927	333.673	33.6973	289.68	223.143	260.222	545.92	404.33	130.621	139.219	141.52	172.151	0			1	L-arabinose	24581151
NCU00890	gh2-1	intracellular b-mannosidase	1	GH2	glycosylhydrolase family 2-1	beta-mannosidase		N	N	Cytoplasm	Cytoplasm	0	0	0	0	0	0	0	0	0	0	0	0.220282	0.668843	19.5843	7.01023	1.45749	6.16475	22.4657	4.09166	2.27283	0.165967	2.47668	0.545567	1.65651	48.504	17.3621	3.60975	15.2681	55.6404	10.1337	5.62907	0.411048	1		Yes	0
NCU02322		mannose-6-phosphate isomerase	1		mannose-6-phosphate isomerase	mannose-6-phosphate isomerase		N	N	Cytoplasm	Cytoplasm	0	-1	0	0	0	0	0	0	0	0	-1	0.0243025	0.313965	0.545467	1.10277	1.08994	1.2281	0.520759	0.592722	0.483416	0.172141	24.4226	0.593532	7.66784	13.3217	26.9326	26.6193	29.9935	12.7183	14.4758	11.8063	4.20414	0			0
NCU07165		mannose-6-phosphate isomerase	1		mannose-6-phosphate isomerase	mannose-6-phosphate isomerase		N	N	Cytoplasm	Cytoplasm	0	0	0	0	0	0	0	0	0	0	0	0.558051	0.689479	0.881624	0.986816	0.950986	0.811917	0.578454	0.629089	0.562283	0.350929	95.9594	53.5502	66.162	84.6	94.6942	91.256	77.911	55.5081	60.367	53.9564	33.6749	0			0
NCU08687		galactokinase	1		galactokinase	galactokinase		N	N	Cytoplasm	Cytoplasm	1	0	0	1	1	0	0	1	1	1	0	0.474427	1.50877	6.48085	5.17144	1.6718	2.21434	3.45301	2.48668	2.16082	0.339815	31.2153	14.8094	47.0967	202.301	161.428	52.1858	69.1214	107.787	77.6225	67.4506	10.6074	0			0
NCU04460		galactose-1-phosphate uridylyltransferase	1		galactose-1-phosphate uridylyltransferase	galactose-1-phosphate uridylyltransferase		N	N	Nucleus	Mitochondria	1	0	0	0	1	0	0	0	1	0	0	0.823882	1.00302	0.980666	4.21031	1.15917	0.675796	0.883482	3.18863	1.73209	0.135211	18.2115	15.0041	18.2664	17.8594	76.6759	21.1102	12.3072	16.0895	58.0697	31.5439	2.46239	0			0
NCU07072		galactose-1-phosphate uridylyltransferase	1		galactose-1-phosphate uridylyltransferase	galactose-1-phosphate uridylyltransferase		N	N	Mitochondria	Mitochondria	1	1	1	0	1	0	0	0	1	0	1	3.14028	1.79571	0.822864	2.00758	0.775714	0.766619	1.09526	1.43106	1.40791	1.40806	9.46856	29.7339	17.0028	7.79134	19.0089	7.34489	7.25878	10.3705	13.5501	13.3309	13.3323	0			0
NCU02654	gh105-1	unsaturated rhamnogalacturonyl hydrolase	1	GH105	glycosyl hydrolase family 88	glycosyl hydrolase family 88		N	N	Cytoskeleton	Cytoplasm	1	-1	-1	0	1	1	0	0	1	1	-1	0.0361118	0.0775082	0.586298	2.47481	4.4797	0.430918	0.674685	12.5333	6.46154	0.077412	9.98305	0.360506	0.773768	5.85304	24.7062	44.721	4.30187	6.73542	125.121	64.5058	0.772808	0			0
NCU01906		D-galacturonate reductase	1		GCY protein	GCY protein		N	N	Cytoplasm	Cytoplasm	1	0	0	0	1	1	0	0	1	1	0	0.102888	0.659086	2.16916	12.0853	4.58781	0.540466	1.46145	8.92376	5.51432	0.205441	55.5361	5.71402	36.6031	120.467	671.17	254.789	30.0154	81.1631	495.591	306.244	11.4094	0			0
NCU09533		D-galacturonate reductase	1		NAD binding Rossmann fold oxidoreductase	NAD binding Rossmann fold oxidoreductase		N	N	Cytoplasm	Peroxisome	1	0	0	0	1	1	0	0	1	1	-1	0.198529	0.540309	0.379559	41.3873	43.6414	0.58262	0.46866	77.9589	42.6141	0.124426	42.2663	8.39111	22.8369	16.0426	1749.29	1844.56	24.6252	19.8085	3295.04	1801.14	5.25902	0			0
NCU07064		L-galactonate dehydratase	1		L-galactonate dehydratase	L-galactonate dehydratase		N	N	Cytoplasm	Peroxisome	1	-1	0	0	1	1	0	0	1	1	-1	0.134702	0.604943	0.886432	16.7871	15.8366	0.704658	1.26839	24.4885	15.8794	0.0776499	29.8942	4.0268	18.0843	26.4992	501.838	473.421	21.0652	37.9176	732.063	474.703	2.32128	0			0
NCU05977		2-keto-3-deoxy-L-galactonate aldolase	0		dihydrodipicolinate synthase	dihydrodipicolinate synthase		N	N	Cytoplasm	Cytoplasm	1	-1	-1	-1	0	0	0	-1	0	1	-1	0.0158099	0.0800053	0.150172	1.16655	1.92612	1.45022	0.139631	0.949754	1.52452	0.0246724	100.259	1.58508	8.02125	15.0561	116.957	193.111	145.397	13.9992	95.2214	152.846	2.47363	0			0
NCU09532		2-keto-3-deoxy-L-galactonate aldolase	1		L-threo-3-deoxy-hexulosonate aldolase	L-threo-3-deoxy-hexulosonate aldolase		N	N	Cytoplasm	Mitochondria	1	-1	-1	0	1	1	0	0	1	1	-1	0.011378	0.112994	0.424947	21.0124	19.5571	0.564443	0.560957	32.0109	20.171	0.0655903	56.8454	0.646787	6.4232	24.1563	1194.46	1111.73	32.086	31.8878	1819.67	1146.63	3.72851	0			0
NCU01399		4-deoxy-L-erythro-5-hexoseulose uronate reductase	1		short chain dehydrogenase/reductase family	short chain dehydrogenase/reductase family		N	N	Cytoplasm	Mitochondria	0	0	0	0	0	0	0	0	0	0	-1	0.183514	0.300385	0.567223	0.628578	1.02996	0.836368	0.550186	0.542368	0.536673	0.175475	44.0864	8.09045	13.2429	25.0068	27.7117	45.4071	36.8724	24.2557	23.911	23.6599	7.73605	0			0
NCU09035		L-rhamnose 1-dehydrogenase	1		alcohol dehydrogenase	alcohol dehydrogenase		N	N	Extracellular	Cytoplasm	1	0	0	0	1	0	0	0	1	1	-1	0.315699	0.369035	0.766089	3.49431	1.6351	0.668012	0.161879	3.74605	1.65499	0.0319745	14.6326	4.6195	5.39994	11.2099	51.1309	23.9258	9.77475	2.36871	54.8145	24.2169	0.46787	0			0
NCU03605		L-rhamnono-1,4-lactonase	0		amidohydrolase	amidohydrolase		N	N	Mitochondria	Golgi apparatus	1	0	0	0	0	0	0	0	1	0	-1	0.524086	0.613999	0.784812	1.55449	0.949802	0.625349	0.689262	1.43209	1.11053	0.160475	37.4859	19.6458	23.0163	29.4194	58.2714	35.6041	23.4417	25.8376	53.683	41.6292	6.01554	0			0
NCU09034		L-rhamnonate dehydratase	0		mandelate racemase/muconate lactonizing enzyme family protein	mandelate racemase/muconate lactonizing enzyme family protein		N	N	Plasma membrane	Vacuole	1	-1	-1	0	1	1	0	0	1	1	-1	0.0378597	0.176536	0.564352	2.41098	6.02917	0.505096	0.267035	13.7168	5.23401	0.0701092	12.6202	0.477798	2.22793	7.12226	30.4271	76.0895	6.37443	3.37004	173.109	66.0544	0.884795	0			0
NCU05037		L-2-keto-3-deoxy-rhamnonate aldolase	0		dihydrodipicolinate synthetase	dihydrodipicolinate synthetase		N	N	Mitochondria	Mitochondria	1	-1	-1	0	0	0	0	0	1	1	-1	0.0223173	0.0673969	0.411178	2.00257	1.81802	1.25541	0.284106	2.40196	1.91535	0.027307	12.587	0.280909	0.848328	5.17552	25.2064	22.8835	15.8019	3.57606	30.2335	24.1086	0.343714	0			0
NCU00378		lactaldehyde dehydrogenase	1		aldehyde dehydrogenase	aldehyde dehydrogenase		N	N	Mitochondria	Mitochondria	0	-1	0	0	0	0	0	0	0	0	-1	0.146243	0.356197	0.826889	0.975729	1.09556	0.992265	0.372575	0.954993	0.665185	0.0205494	260.076	38.0344	92.6384	215.054	253.764	284.93	258.065	96.898	248.371	172.999	5.34442	0			0
NCU00417		lactaldehyde dehydrogenase	0		cell cycle control protein cwf14	cell cycle control protein cwf14		N	N	Nucleus	Mitochondria	0	0	0	0	0	0	0	0	0	0	0	1.01238	0.730489	0.643099	0.871347	1.01257	0.809303	0.77797	0.571584	0.618172	1.06215	41.6995	42.2156	30.461	26.8169	36.3347	42.2237	33.7475	32.4409	23.8347	25.7775	44.2909	0			0
NCU00810	gh2-3	intracellular b-galactosidase	1	GH2	glycosylhydrolase family 2-3	beta-galactosidase		N	N	Cytoplasm	Cytoplasm	1	-1	0	0	1	0	0	0	1	1	0	0.184586	0.644965	1.47353	2.00598	1.56866	1.28951	1.35456	10.7016	5.23886	0.520216	36.6108	6.75784	23.6127	53.9471	73.4405	57.4301	47.2099	49.5916	391.794	191.799	19.0455	0			0
NCU05956	gh2-2	intracellular b-galactosidase	1	GH2	glycosylhydrolase family 2-2	beta-galactosidase		N	N	Nucleus	Cytoplasm	0	-1	-1	0	0	0	0	0	0	0	-1	0.0132257	0.125528	1.75974	0.312386	1.26909	1.23905	1.5607	0.527547	0.469327	0.0408128	56.573	0.748216	7.10152	99.5537	17.6726	71.796	70.0968	88.2937	29.8449	26.5512	2.30891	0			0
NCU06523	gh13-4	intracellular a-glucosidase	1	GH13	glycosylhydrolase family 13-4	alpha-glucosidase		N	N	Cytoplasm	Cytoplasm	0	-1	-1	0	-1	0	0	0	-1	-1	-1	0.0513796	0.0429918	0.447136	0.141536	0.838355	0.717756	0.166766	0.187277	0.143638	0.0144826	7.81975	0.401776	0.336185	3.49649	1.10678	6.55572	5.61267	1.30407	1.46446	1.12322	0.11325	0			0
NCU07860	gh13-5	intracellular a-glucosidase	1	GH13	glycosylhydrolase 13-5	alpha-glucosidase		N	N	Nucleus	Cytoplasm	0	0	0	0	0	0	0	0	0	0	0	0.428674	0.567255	0.912543	1.07179	0.954588	0.854805	0.936139	0.801887	1.10876	0.624384	1.94904	0.835502	1.1056	1.77858	2.08896	1.86053	1.66605	1.82457	1.56291	2.16101	1.21695	0			0
NCU04442		intracellular aldose 1-epimerase	1		GAL10	GAL10		N	N	Cytoplasm	Cytoplasm	0	0	0	0	0	0	0	0	0	0	0	0.48664	0.777251	1.0752	1.02375	1.19166	0.996104	0.858344	0.889526	0.818269	0.745485	101.18	49.2382	78.6421	108.788	103.583	120.572	100.786	86.8471	90.0021	82.7922	75.428	0			0
NCU08030		intracellular aldose 1-epimerase	1		UDP-glucose 4-epimerase Gal10	UDP-glucose 4-epimerase Gal10		N	N	Cytoplasm	Cytoplasm	0	1	0	0	0	0	0	0	0	0	0	1.87138	0.77817	0.67228	1.46544	0.703433	0.565273	0.89653	0.685346	0.649172	0.685596	40.4256	75.6519	31.458	27.1773	59.2415	28.4367	22.8515	36.2428	27.7055	26.2432	27.7157	0			0
NCU09705		intracellular aldose 1-epimerase	1		GAL10	GAL10		N	N	Cytoplasm	Extracellular	0	-1	0	1	1	0	0	0	1	1	-1	0.107688	0.530156	13.5044	36.4801	1.50808	0.93656	2.0604	2.03039	3.98926	0.164592	38.7071	4.1683	20.5208	522.716	1412.04	58.3735	36.2515	79.7519	78.5904	154.412	6.37086	1		Yes	0
[truncated: 3 more columns]

## Sheet: Confidence Score
Gene	Name	Annotation Support						Our Annotation
		Functional Genomics	Transcriptomics	Proteomics	Genetics	Biochemical	Confidence Score
NCU00762	gh5-1	1	1	1	1	1	1	endo-b-1,4-glucanase
NCU04027	gh7-3	0	0	0	0	0	0
NCU04854	gh7-2	1	1	1	0	1	0.741935
NCU05057	gh7-1	1	1	1	0	1	0.741935
NCU05121	gh45-1	1	1	1	0	1	0.741935
NCU05955	gh74-1	1	1	1	0	1	0.741935
NCU09764		1	1	1	0	0	0.225806	endo-b-1,4-glucanase and exo-b-1,3/1,6-glucanase
NCU00836		0	1	0	0	0	0.0645161	lytic polysaccharide monooxygenase 1 (LPMO1)
NCU01867	NcLPMO9J	1	0	0	0	1	0.548387
NCU02344		1	1	0	0	0	0.0967742
NCU03328	NcLPMO9F	1	1	0	0	1	0.612903
NCU08760	NcLPMO9E	1	1	1	0	1	0.741935
NCU03000		1	0	0	0	0	0.0322581	lytic polysaccharide monooxygenase 3 (LPMO3)
NCU05969		1	1	0	0	0	0.0967742
NCU07520		1	0	0	0	0	0.0322581
NCU07760		1	1	0	0	0	0.0967742
NCU07898	NcLPMO9M	1	1	1	0	1	0.741935
NCU07974		1	0	0	0	0	0.0322581
NCU01050	NcLPMO9D	1	1	1	0	1	0.741935	lytic polysaccharide monooxygenase 2 (LPMO2)
NCU02240		1	1	1	0	0	0.225806
NCU02916	NcLPMO9C	1	1	0	0	1	0.612903
NCU03996	gh6-1	1	0	0	0	1	0.548387	exo-b-1,4-glucanase or cellobiohydrolase
NCU05104	gh7-4	1	0	0	0	0	0.0322581
NCU07190	gh6-3	0	1	1	0	0	0.193548
NCU07340	cbh-1	1	1	1	1	1	1
NCU09680	gh6-2 or cbh-2	1	1	1	1	1	1
NCU01866		1	1	0	0	1	0.612903	extracellular lactonase
NCU07143		1	1	1	0	0	0.225806
NCU07703		1	0	0	0	1	0.548387
NCU00206	cdh-1	1	1	1	0	1	0.741935	cellobiose dehydrogenase
NCU05923	cdh-2	1	0	0	0	1	0.548387
NCU03641	gh3-1	1	0	0	0	1	0.548387	extracellular b-glucosidase
NCU04952	gh3-4	1	1	1	1	1	1
NCU08755	gh3-3	1	1	1	0	1	0.741935
NCU02855	gh11-1	1	1	1	0	1	0.741935	endo-b-1,4-xylanase
NCU04997	gh10-3	1	0	0	0	1	0.548387
NCU05924	gh10-1	1	1	1	0	1	0.741935
NCU07130	gh10-4	0	0	0	0	1	0.516129
NCU07225	gh11-2	1	1	1	0	1	0.741935
NCU08189	gh10-2	1	1	1	1	1	1
NCU02343	gh51-1	1	1	1	0	1	0.741935	a-arabinofuranosidase
NCU07326	gh43-6	1	1	1	0	0	0.225806
NCU09170	gh43-4	1	1	1	0	0	0.225806
NCU09775	gh54-1	1	1	1	0	1	0.741935
NCU06143	gh115-1	1	1	1	0	0	0.225806	a-glucuronidase
NCU07351	gh67-1	1	1	0	0	1	0.612903
NCU02550	gh36-1	0	0	0	0		0	a-galactosidase
NCU00642	gh35-1	1	1	1	1	1	1	extracellular b-galactosidase
NCU04623	gh35-2	1	1	1	0	1	0.741935
NCU08785	ce1-3	1	1	1	0	1	0.741935	feruloyl esterase
NCU09026		1	0	0	0	1	0.548387
NCU09491	fea-1	1	1	1	0	1	0.741935
NCU09774	ce1-5	1	0	0	0	1	0.548387
NCU00710	ce1-4	1	1	0	0	1	0.612903	acetyl esterase
NCU03181		1	1	0	0	1	0.612903
NCU04494	ce1-2	1	1	0	0	0	0.0967742
NCU04870	ce1-1	1	1	1	0	1	0.741935
NCU05159	ce5-1	1	1	1	0	1	0.741935
NCU09663	ce5-2	0	1	1	0	0	0.193548
NCU09664	ce5-3	1	1	1	0	1	0.741935
NCU00709	gh3-8	1	1	0	0	1	0.612903	extracellular b-xylosidase
NCU09923	gh3-7	1	1	1	0	1	0.741935
NCU09416		1	1	0	0	0	0.0967742	acetyl mannan esterase
NCU08412	gh5-7	0	1	1	1	1	0.967742	endo-b-1,4-mannanase
NCU00985	gh2-4	1	1	1	0	0	0.225806	(probable) extracellular b-mannosidase
NCU04885	gh31-4	0	0	0	0	0	0	a-xylosidase
NCU06381	gh17-1	1	0	0	0	0	0.0322581	endo-b-1,3-glucanase
NCU07347	gh17-2	0	0	0	0	1	0.516129
NCU09175	gh17-3	1	0	1	0	0	0.16129
NCU03914	gh5-4	0	0	0	0	1	0.516129	exo-b-1,3-glucanase
NCU09326	gh17-4	1	0	1	0	0	0.16129
NCU02369	gh28-1	1	1	1	1	1	1	endogalacturonase
NCU06961	gh28-2	1	1	1	1	1	1	exogalacturonase
NCU06326	pl1-1	1	1	1	0	1	0.741935	pectate lyase
NCU08176	pl3-1	1	1	1	0	1	0.741935
NCU10045	ce8-1	1	1	1	1	1	1	pectin methyl esterase
NCU05598	pl4-1	1	1	1	0	1	0.741935	rhamnogalacturonan lyase
NCU00972	gh53-1	1	1	0	0	1	0.612903	endo-b-1,4-galactanase
NCU05882	gh5-5	1	1	1	0	1	0.741935	endo-b-1,6-galactanase
NCU09702		1	0	0	0	0	0.0322581
NCU00852	gh43-1	1	0	0	0	1	0.548387	endoarabinanase
NCU05965	gh43-7	1	1	1	1	0	0.483871	endoarabinanase
NCU09924	gh93-1	1	1	0	0	1	0.612903	exoarabinanase
NCU00937	gh79-1	1	0	1	0	1	0.677419	extracellular b-glucuronidase
NCU08179	gh79-2	1	1	0	0	0	0.0967742
NCU09976	ce12-1	1	1	1	0	1	0.741935	rhamnogalacturonan acetyl esterase
NCU00743	gh13-7	0	0	0	0	0	0	amylo-a-1,6-glucosidase
NCU02478	gh13-8	1	1	0	0	0	0.0967742	a-amylase
NCU05429	gh13-9	0	0	0	0	0	0
NCU05873	gh13-6	0	1	0	0	1	0.580645
NCU08131	gh13-1	1	0	0	0	0	0.0322581
NCU08132	gh13-10	1	1	0	0	0	0.0967742
NCU09486	gh13-3	0	0	0	0	1	0.516129
NCU09805	gh13-2	1	0	0	0	1	0.548387
NCU08746		1	1	1	0	1	0.741935	starch-active lytic polysaccharide monooxygenase (LPMO)
NCU01517	gla-1	0	1	1	0	1	0.709677	extracellular a-glucosidase
NCU02583	gla-2	1	0	1	0	1	0.677419
NCU03098	gh15-1	0	0	0	0	0	0
NCU04203	gh31-2	0	0	0	0	0	0
NCU04674	gh31-3	1	0	1	0	1	0.677419
NCU09281	gh31-1	1	0	1	0	1	0.677419
NCU08398		1	0	1	0	0	0.16129	extracellular aldose 1-epimerase
NCU08516		1	0	1	0	0	0.16129
NCU00801	cdt-1	1	1	1	1	1	1	cellodextrin transporter
NCU00809		1	0	0	0	1	0.548387	cellobiose transporter
NCU08114	cdt-2	1	1	1	1	1	1	cellodextrin and xylodextrin transporter
NCU05853	cdt-3	1	1	1	0	1	0.741935	cellobionic acid transporter
NCU01633	glt-1	1	1	0	0	1	0.612903	glucose transporter
NCU04963	an29-2	1	1	0	0	1	0.612903	glucose and xylose transporter
NCU06138	xy31	1	1	1	0	1	0.741935
NCU10021	hgt-1	1	1	0	0	1	0.612903	glucose transporter
NCU01132	xat-1	1	1	0	0	1	0.612903	xylose and arabinose transporter
NCU02188	lat-1	1	1	0	1	1	0.870968
NCU00988	gat-1	1	1	0	1	1	0.870968	galacturonic acid and glucuronic acid transporter
NCU00821	an25	1	1	0	0	1	0.612903	xylose transporter
NCU04537		1	1	0	0	1	0.612903
NCU05627	xyt-1	1	1	0	0	1	0.612903
NCU09287		1	0	0	0	1	0.548387
NCU05897		1	1	0	0	0	0.0967742	fucose transporter
NCU01868		1	0	0	0	0	0.0322581	maltose transporter
NCU06522		1	0	0	0	0	0.0322581
NCU12154		1	0	0	0	0	0.0322581
NCU00130	gh1-1	1	1	1	0	1	0.741935	intracellular b-glucosidase
NCU05577	gh3-5	1	0	0	0	1	0.548387
NCU07487	gh3-6	1	1	0	0	0	0.0967742
NCU08054	gh3-2	0	0	0	0	1	0.516129
NCU09425	gh94-1	1	1	0	0	1	0.612903	cellobiose phosphorylase
NCU10058	rg-1	1	0	0	0	0	0.0322581	phosphoglucomutase
NCU00575		1	1	0	0	1	0.612903	hexokinase
NCU02542		1	0	0	0	1	0.548387
NCU04728		1	0	0	0	0	0.0322581
NCU06996		1	0	0	0	0	0.0322581
NCU07626		1	0	0	0	0	0.0322581
NCU04923	gcy-1	1	1	0	0	1	0.612903	glyceraldehyde reductase
NCU01900	gh43-2	1	1	1	0	1	0.741935	intracellular b-xylosidase
NCU09652	gh43-5	1	1	1	0	1	0.741935
NCU08384		1	1	1	1	1	1	D-xylose reductase, L-arabinose reductase, D-galactose reductase
NCU00891		1	1	1	1	1	1	xylitol dehydrogenase, D-sorbitol dehydrogenase
NCU11353		1	1	1	0	1	0.741935	xylulokinase
NCU00519		1	0	0	0	0	0.0322581	ribulose-phosphate 3-epimerase
NCU00643		1	1	0	1	1	0.870968	L-arabitol dehydrogenase, galactitol dehydrogenase
NCU09041		1	0	0	1	1	0.806452	L-xylulose reductase, L-sorbitol reductase
NCU00890	gh2-1	1	0	1	0	1	0.677419	intracellular b-mannosidase
NCU02322		1	0	0	0	0	0.0322581	mannose-6-phosphate isomerase
NCU07165		1	0	0	0	1	0.548387
NCU08687		1	1	0	0	1	0.612903	galactokinase
NCU04460		1	1	0	0	0	0.0967742	galactose-1-phosphate uridylyltransferase
NCU07072		1	1	0	0	0	0.0967742
NCU02654	gh105-1	1	1	0	0	0	0.0967742	unsaturated rhamnogalacturonyl hydrolase
NCU01906		1	1	0	0	1	0.612903	D-galacturonate reductase
NCU09533		1	1	0	0	1	0.612903
NCU07064		1	1	0	0	1	0.612903	L-galactonate dehydratase
NCU05977		0	1	0	0	1	0.580645	2-keto-3-deoxy-L-galactonate aldolase
NCU09532		1	1	0	0	1	0.612903
NCU01399		1	0	0	0	0	0.0322581	4-deoxy-L-erythro-5-hexoseulose uronate reductase
NCU09035		1	1	0	0	1	0.612903	L-rhamnose 1-dehydrogenase
NCU03605		0	1	0	0	1	0.580645	L-rhamnono-1,4-lactonase
NCU09034		0	1	0	0	1	0.580645	L-rhamnonate dehydratase
NCU05037		0	1	0	0	1	0.580645	L-2-keto-3-deoxy-rhamnonate aldolase
NCU00378		1	0	0	0	1	0.548387	lactaldehyde dehydrogenase
NCU00417		0	0	0	0	1	0.516129
NCU00810	gh2-3	1	1	0	0	1	0.612903	intracellular b-galactosidase
NCU05956	gh2-2	1	0	0	0	1	0.548387
NCU06523	gh13-4	1	0	0	0	1	0.548387	intracellular a-glucosidase
NCU07860	gh13-5	1	0	0	0	0	0.0322581
NCU04442		1	0	0	0	1	0.548387	intracellular aldose 1-epimerase
NCU08030		1	0	0	0	0	0.0322581
NCU09705		1	0	1	0	0	0.16129

## Sheet: References
S.No.	Title	Authors	Journal and Year	Pubmed Identifier
1	Purification and specificity of cellobiose phosphorylase from Clostridium thermocellum.	Alexander JK.	J Biol Chem. 1968 Jun 10;243(11):2899-904. .	PMID:5653182
2	Glucoamylases G1 and G2 from Aspergillus niger are synthesized from two different but closely related mRNAs.	Boel E, Hjort I, Svensson B, Norris F, Norris KE, Fiil NP.	EMBO J. 1984 May;3(5):1097-102.	PMID:6203744 | PMCID:PMC557479
3	Effect of phosphonoacetic acid on experimental vaccinia infection.	Andzhaparide OG, Bektemirov TA, Burgasova MP, Chekunova EV.	Vopr Virusol. 1978 Jan-Feb;(1):56-9. Russian.	PMID:645058
4	Lymphocyte subpopulations, serum immunoglobulins and complement factors in patients with atopic dermatitis.	Braathen LR, Førre O, Natvig JB, Rajka G.	Br J Dermatol. 1978 May;98(5):521-8.	PMID:656325
5	Alteration of respiratory timing by abrupt decreases in carotid body activity.	Hanson MA, Nye PC, Torrance RW.	J Physiol. 1978 May;278:17P. .	PMID:671283
6	Mini-photometer and mini-centrifuge for determination of Hb and Hk.	Voigt E.	Anaesthesist. 1978 Aug;27(8):403-4. German.	PMID:696988
7	Formation of the epicardium studied with the scanning electron microscope.	Ho E, Shimada Y.	Dev Biol. 1978 Oct;66(2):579-85. .	PMID:700255
8	Colonic protection from dimethylhydrazine by a high fiber diet.	Chen WF, Goldsmith HS.	Surg Gynecol Obstet. 1978 Oct;147(4):503-6.	PMID:705568
9	Cellulase production by Neurospora crassa: purification and characterization of cellulolytic enzymes.	Yazdi MT, Radford A, Keen JN, Woodward JR.	Enzyme Microb Technol. 1990 Feb;12(2):120-3.	PMID:1368541
10	Characterization and expression of a genomic pectin methyl esterase-encoding gene in Aspergillus niger.	Khanh NQ, Ruttkowski E, Leidinger K, Albrecht H, Gottschalk M.	Gene. 1991 Sep 30;106(1):71-7.	PMID:1937044
11	Fermentation and aerobic metabolism of cellodextrins by yeasts.	Freer SN.	Appl Environ Microbiol. 1991 Mar;57(3):655-9.	PMID:2039228 | PMCID:PMC182775
12	Saccharomyces cerevisiae cells secreting an Aspergillus niger beta-galactosidase grow on whey permeate.	Kumar V, Ramakrishnan S, Teeri TT, Knowles JK, Hartley BS.	Biotechnology (N Y). 1992 Jan;10(1):82-5.	PMID:1368193
13	Cloning of the Aspergillus niger gene encoding alpha-L-arabinofuranosidase A.	Flipphi MJ, Visser J, van der Veen P, de Graaff LH.	Appl Microbiol Biotechnol. 1993 Jun;39(3):335-40.	PMID:7764056
14	Acetyl xylan esterase from Trichoderma reesei contains an active-site serine residue and a cellulose-binding domain.	Margolles-Clark E, Tenkanen M, Söderlund H, Penttilä M.	Eur J Biochem. 1996 May 1;237(3):553-60.	PMID:8647098
15	Molecular cloning and expression in Saccharomyces cerevisiae of two Aspergillus nidulans xylanase genes.	Pérez-Gonzalez JA, De Graaff LH, Visser J, Ramón D.	Appl Environ Microbiol. 1996 Jun;62(6):2179-82.	PMID:8787417 | PMCID:PMC167998
16	Three-dimensional structure of Endo-1,4-beta-xylanase I from Aspergillus niger: molecular basis for its low pH optimum.	Krengel U, Dijkstra BW.	J Mol Biol. 1996 Oct 18;263(1):70-8.	PMID:8890913
17	Purification and properties of a cellobiose phosphorylase (CepA) and a cellodextrin phosphorylase (CepB) from the cellulolytic thermophile Clostridium stercorarium.	Reichenbecher M, Lottspeich F, Bronnenmeier K.	Eur J Biochem. 1997 Jul 1;247(1):262-7.	PMID:9249035
18	The transcriptional activator XlnR regulates both xylanolytic and endoglucanase gene expression in Aspergillus niger.	van Peij NN, Gielkens MM, de Vries RP, Visser J, de Graaff LH.	Appl Environ Microbiol. 1998 Oct;64(10):3615-9.	PMID:9758775 | PMCID:PMC106473
19	pgaA and pgaB encode two constitutively expressed endopolygalacturonases of Aspergillus niger.	Parenicová L, Benen JA, Kester HC, Visser J.	Biochem J. 2000 Feb 1;345 Pt 3:637-44.	PMID:10642523 | PMCID:PMC1220799
20	Cloning, expression, characterization, and nucleophile identification of family 3, Aspergillus niger beta-glucosidase.	Dan S, Marton I, Dekel M, Bravdo BA, He S, Withers SG, Shoseyov O.	J Biol Chem. 2000 Feb 18;275(7):4973-80.	PMID:10671536
21	Synergy between enzymes from Aspergillus involved in the degradation of plant cell wall polysaccharides.	de Vries RP, Kester HC, Poulsen CH, Benen JA, Visser J.	Carbohydr Res. 2000 Aug 7;327(4):401-10.	PMID:10990025
22	Exo-arabinanase of Penicillium chrysogenum able to release arabinobiose from alpha-1,5-L-arabinan.	Sakamoto T, Thibault JF.	Appl Environ Microbiol. 2001 Jul;67(7):3319-21.	PMID:11425761 | PMCID:PMC93020
23	EglC, a new endoglucanase from Aspergillus niger with major activity towards xyloglucan.	Hasper AA, Dekkers E, van Mil M, van de Vondervoort PJ, de Graaff LH.	Appl Environ Microbiol. 2002 Apr;68(4):1556-60.	PMID:11916668 | PMCID:PMC123852
24	The beta-1,4-endogalactanase A gene from Aspergillus niger is specifically induced on arabinose and galacturonic acid and plays an important role in the degradation of pectic hairy regions.	De Vries RP, Parenicová L, Hinz SW, Kester HC, Beldman G, Benen JA, Visser J.	Eur J Biochem. 2002 Oct;269(20):4985-93.	PMID:12383257
25	Expression profiling of pectinolytic genes from Aspergillus niger.	de Vries RP, Jansen J, Aguilar G, Parenicová L, Joosten V, Wülfert F, Benen JA, Visser J.	FEBS Lett. 2002 Oct 23;530(1-3):41-7.	PMID:12387863
26	Regulation by carbon and nitrogen sources of a family of cellulases in Aspergillus nidulans.	Lockington RA, Rodbourn L, Barnett S, Carter CJ, Kelly JM.	Fungal Genet Biol. 2002 Nov;37(2):190-6.	PMID:12409103
27	A non-modular type B feruloyl esterase from Neurospora crassa exhibits concentration-dependent substrate inhibition.	Crepin VF, Faulds CB, Connerton IF.	Biochem J. 2003 Mar 1;370(Pt 2):417-27.	PMID:12435269 | PMCID:PMC1223187
28	Molecular cloning of endo-beta-D-1,4-glucanase genes, rce1, rce2, and rce3, from Rhizopus oryzae.	Moriya T, Murashima K, Nakane A, Yanai K, Sumida N, Koga J, Murakami T, Kono T.	J Bacteriol. 2003 Mar;185(5):1749-56.	PMID:12591897 | PMCID:PMC148074
29	The genome sequence of the filamentous fungus Neurospora crassa.	Galagan JE, Calvo SE, Borkovich KA, Selker EU, Read ND, Jaffe D, FitzHugh W, Ma LJ, Smirnov S, Purcell S, Rehman B, Elkins T, Engels R, Wang S, Nielsen CB, Butler J, Endrizzi M, Qui D, Ianakiev P, Bell-Pedersen D, Nelson MA, Werner-Washburne M, et al.	Nature. 2003 Apr 24;422(6934):859-68.	PMID:12712197
30	Metabolic pathway promiscuity in the archaeon Sulfolobus solfataricus revealed by studies on glucose dehydrogenase and 2-keto-3-deoxygluconate aldolase.	Lamble HJ, Heyer NI, Bull SD, Hough DW, Danson MJ.	J Biol Chem. 2003 Sep 5;278(36):34066-72. Epub 2003 Jun 24.	PMID:12824170
31	UDPgalactose 4-epimerase from Saccharomyces cerevisiae. A bifunctional enzyme with aldose 1-epimerase activity.	Majumdar S, Ghatak J, Mukherji S, Bhattacharjee H, Bhaduri A.	Eur J Biochem. 2004 Feb;271(4):753-9.	PMID:14764091
32	Lessons from the genome sequence of Neurospora crassa: tracing the path from genomic blueprint to multicellular organism.	Borkovich KA, Alex LA, Yarden O, Freitag M, Turner GE, Read ND, Seiler S, Bell-Pedersen D, Paietta J, Plesofsky N, Plamann M, Goodrich-Tanrikulu M, Schulte U, Mannhaupt G, Nargang FE, Radford A, Selitrennikoff C, Galagan JE, Dunlap JC, Loros JJ, Catcheside D, Inoue H, et al.	Microbiol Mol Biol Rev. 2004 Mar;68(1):1-108. Review.	PMID:15007097 | PMCID:PMC362109
33	Transcriptional response to glucose starvation and functional analysis of a glucose transporter of Neurospora crassa.	Xie X, Wilkinson HH, Correa A, Lewis ZA, Bell-Pedersen D, Ebbole DJ.	Fungal Genet Biol. 2004 Dec;41(12):1104-19.	PMID:15531214
34	Expression of the Fusarium oxysporum lactonase gene in Aspergillus oryzae: molecular properties of the recombinant enzyme and its application.	Honda K, Tsuboi H, Minetoki T, Nose H, Sakamoto K, Kataoka M, Shimizu S.	Appl Microbiol Biotechnol. 2005 Feb;66(5):520-6. Epub 2004 Oct 19.	PMID:15503009
35	Acid trehalase in yeasts and filamentous fungi: localization, regulation and physiological function.	Parrou JL, Jules M, Beltran G, François J.	FEMS Yeast Res. 2005 Apr;5(6-7):503-11. Review.	PMID:15780651
36	Identification in the mold Hypocrea jecorina of the first fungal D-galacturonic acid reductase.	Kuorelahti S, Kalkkinen N, Penttilä M, Londesborough J, Richard P.	Biochemistry. 2005 Aug 23;44(33):11234-40.	PMID:16101307
37	Cell wall assembly in Saccharomyces cerevisiae.	Lesage G, Bussey H.	Microbiol Mol Biol Rev. 2006 Jun;70(2):317-43. Review.	PMID:16760306 | PMCID:PMC1489534
38	A novel glycoside hydrolase family 105: the structure of family 105 unsaturated rhamnogalacturonyl hydrolase complexed with a disaccharide in comparison with family 88 enzyme complexed with the disaccharide.	Itoh T, Ochiai A, Mikami B, Hashimoto W, Murata K.	J Mol Biol. 2006 Jul 14;360(3):573-85. Epub 2006 May 9.	PMID:16781735
39	Development and application of a suite of polysaccharide-degrading enzymes for analyzing plant cell walls.	Bauer S, Vasu P, Persson S, Mort AJ, Somerville CR.	Proc Natl Acad Sci U S A. 2006 Jul 25;103(30):11417-22. Epub 2006 Jul 14.	PMID:16844780 | PMCID:PMC1544100
40	L-galactonate dehydratase is part of the fungal path for D-galacturonic acid catabolism.	Kuorelahti S, Jouhten P, Maaheimo H, Penttilä M, Richard P.	Mol Microbiol. 2006 Aug;61(4):1060-8.	PMID:16879654
41	Enzymes for the NADPH-dependent reduction of dihydroxyacetone and D-glyceraldehyde and L-glyceraldehyde in the mould Hypocrea jecorina.	Liepins J, Kuorelahti S, Penttilä M, Richard P.	FEBS J. 2006 Sep;273(18):4229-35. Epub 2006 Aug 23.	PMID:16930134
42	Expression profile of amylolytic genes in Aspergillus nidulans.	Nakamura T, Maeda Y, Tanoue N, Makita T, Kato M, Kobayashi T.	Biosci Biotechnol Biochem. 2006 Oct;70(10):2363-70. Epub 2006 Oct 7.	PMID:17031028
43	A type B feruloyl esterase from Aspergillus nidulans with broad pH applicability.	Shin HD, Chen RR.	Appl Microbiol Biotechnol. 2007 Jan;73(6):1323-30. Epub 2006 Oct 17.	PMID:17043824
44	alpha-ketoglutaric semialdehyde dehydrogenase isozymes involved in metabolic pathways of D-glucarate, D-galactarate, and hydroxy-L-proline. Molecular and metabolic convergent evolution.	Watanabe S, Yamada M, Ohtsu I, Makino K.	J Biol Chem. 2007 Mar 2;282(9):6685-95. Epub 2007 Jan 3.	PMID:17202142
45	Genome sequencing and analysis of the versatile cell factory Aspergillus niger CBS 513.88.	Pel HJ, de Winde JH, Archer DB, Dyer PS, Hofmann G, Schaap PJ, Turner G, de Vries RP, Albang R, Albermann K, Andersen MR, Bendtsen JD, Benen JA, van den Berg M, Breestraat S, Caddick MX, Contreras R, Cornell M, Coutinho PM, Danchin EG, Debets AJ, Dekker P, et al.	Nat Biotechnol. 2007 Feb;25(2):221-31. Epub 2007 Jan 28.	PMID:17259976
46	Biochemical characterization of an L-Xylulose reductase from Neurospora crassa.	Nair N, Zhao H.	Appl Environ Microbiol. 2007 Mar;73(6):2001-4. Epub 2007 Jan 19.	PMID:17261518 | PMCID:PMC1828828
47	Characterization of Fusarium oxysporum beta-1,6-galactanase, an enzyme that hydrolyzes larch wood arabinogalactan.	Sakamoto T, Taniguchi Y, Suzuki S, Ihara H, Kawasaki H.	Appl Environ Microbiol. 2007 May;73(9):3109-12. Epub 2007 Mar 9.	PMID:17351093 | PMCID:PMC1892885
48	Induction of the gal pathway and cellulase genes involves no transcriptional inducer function of the galactokinase in Hypocrea jecorina.	Hartl L, Kubicek CP, Seiboth B.	J Biol Chem. 2007 Jun 22;282(25):18654-9. Epub 2007 Apr 23.	PMID:17452322
49	The missing link in the fungal D-galacturonate pathway: identification of the L-threo-3-deoxy-hexulosonate aldolase.	Hilditch S, Berghäll S, Kalkkinen N, Penttilä M, Richard P.	J Biol Chem. 2007 Sep 7;282(36):26195-201. Epub 2007 Jul 3.	PMID:17609199
50	Purification and properties of a beta-galactosidase with potential application as a digestive supplement.	O'Connell S, Walsh G.	Appl Biochem Biotechnol. 2007 Apr;141(1):1-14.	PMID:17625262
51	The transcription of the gene for iso-orotate decarboxylase (IDCase), an enzyme of the thymidine salvage pathway, is downregulated in the pregc mutant strain of Neurospora crassa grown under phosphate starvation.	Leal J, Squina FM, Martinez-Rossi NM, Rossi A.	Can J Microbiol. 2007 Aug;53(8):1011-5.	PMID:17898858
52	Phylogenetic and biochemical characterization of a novel cluster of intracellular fungal alpha-amylase enzymes.	van der Kaaij RM, Janecek S, van der Maarel MJ, Dijkhuizen L.	Microbiology. 2007 Dec;153(Pt 12):4003-15.	PMID:18048915
53	Isoflavone aglycones production from isoflavone glycosides by display of beta-glucosidase from Aspergillus oryzae on yeast cell surface.	Kaya M, Ito J, Kotaka A, Matsumura K, Bando H, Sahara H, Ogino C, Shibasaki S, Kuroda K, Ueda M, Kondo A, Hata Y.	Appl Microbiol Biotechnol. 2008 May;79(1):51-60. doi: 10.1007/s00253-008-1393-6. Epub 2008 Mar 14.	PMID:18340445
54	Properties of family 79 beta-glucuronidases that hydrolyze beta-glucuronosyl and 4-O-methyl-beta-glucuronosyl residues of arabinogalactan-protein.	Konishi T, Kotake T, Soraya D, Matsuoka K, Koyama T, Kaneko S, Igarashi K, Samejima M, Tsumuraya Y.	Carbohydr Res. 2008 May 19;343(7):1191-201. doi: 10.1016/j.carres.2008.03.004. Epub 2008 Mar 18.	PMID:18377882
55	Identification in the yeast Pichia stipitis of the first L-rhamnose-1-dehydrogenase gene.	Koivistoinen OM, Hilditch S, Voutilainen SP, Boer H, Penttilä M, Richard P.	FEBS J. 2008 May;275(10):2482-8. doi: 10.1111/j.1742-4658.2008.06392.x. Epub 2008 Apr 8.	PMID:18400031
56	Brassica napus possesses an expanded set of polygalacturonase inhibitor protein genes that are differentially regulated in response to Sclerotinia sclerotiorum infection, wounding and defense hormone treatment.	Hegedus DD, Li R, Buchwaldt L, Parkin I, Whitwill S, Coutu C, Bekkaoui D, Rimmer SR.	Planta. 2008 Jul;228(2):241-53. doi: 10.1007/s00425-008-0733-1. Epub 2008 Apr 23.	PMID:18431596
57	Pectin structure and biosynthesis.	Mohnen D.	Curr Opin Plant Biol. 2008 Jun;11(3):266-77. doi: 10.1016/j.pbi.2008.03.006. Epub 2008 May 15. Review.	PMID:18486536
58	Eukaryotic and bacterial gene clusters related to an alternative pathway of nonphosphorylated L-rhamnose metabolism.	Watanabe S, Saimura M, Makino K.	J Biol Chem. 2008 Jul 18;283(29):20372-82. doi: 10.1074/jbc.M801065200. Epub 2008 May 27.	PMID:18505728
59	An evolutionary conserved d-galacturonic acid metabolic pathway operates across filamentous fungi capable of pectin degradation.	Martens-Uzunova ES, Schaap PJ.	Fungal Genet Biol. 2008 Nov;45(11):1449-57. doi: 10.1016/j.fgb.2008.08.002. Epub 2008 Aug 14.	PMID:18768163
60	Metabolic fate of L-lactaldehyde derived from an alternative L-rhamnose pathway.	Watanabe S, Piyanart S, Makino K.	FEBS J. 2008 Oct;275(20):5139-49. doi: 10.1111/j.1742-4658.2008.06645.x. Epub 2008 Sep 11.	PMID:18793327
61	The Carbohydrate-Active EnZymes database (CAZy): an expert resource for Glycogenomics.	Cantarel BL, Coutinho PM, Rancurel C, Bernard T, Lombard V, Henrissat B.	Nucleic Acids Res. 2009 Jan;37(Database issue):D233-8. doi: 10.1093/nar/gkn663. Epub 2008 Oct 5.	PMID:18838391 | PMCID:PMC2686590
62	A novel glucosylation enzyme: molecular cloning, expression, and characterization of Trichoderma viride JCM22452 alpha-amylase and enzymatic synthesis of some flavonoid monoglucosides and oligoglucosides.	Noguchi A, Inohara-Ochiai M, Ishibashi N, Fukami H, Nakayama T, Nakao M.	J Agric Food Chem. 2008 Dec 24;56(24):12016-24. doi: 10.1021/jf801712g.	PMID:19049410
63	Trifluoromethanesulfonic acid-based proteomic analysis of cell wall and secreted proteins of the ascomycetous fungi Neurospora crassa and Candida albicans.	Maddi A, Bowman SM, Free SJ.	Fungal Genet Biol. 2009 Oct;46(10):768-81. doi: 10.1016/j.fgb.2009.06.005. Epub 2009 Jun 23.	PMID:19555771 | PMCID:PMC2728151
64	Comprehensive genomic analysis of cell wall genes in Aspergillus nidulans.	de Groot PW, Brandt BW, Horiuchi H, Ram AF, de Koster CG, Klis FM.	Fungal Genet Biol. 2009 Mar;46 Suppl 1:S72-81.	PMID:19585695
65	Assessment of the pectin degrading enzyme network of Aspergillus niger by functional genomics.	Martens-Uzunova ES, Schaap PJ.	Fungal Genet Biol. 2009 Mar;46 Suppl 1:S170-S179.	PMID:19618506
66	Genes regulated by AoXlnR, the xylanolytic and cellulolytic transcriptional regulator, in Aspergillus oryzae.	Noguchi Y, Sano M, Kanamaru K, Ko T, Takeuchi M, Kato M, Kobayashi T.	Appl Microbiol Biotechnol. 2009 Nov;85(1):141-54. doi: 10.1007/s00253-009-2236-9.	PMID:19777228
67	Systems analysis of plant cell wall degradation by the model filamentous fungus Neurospora crassa.	Tian C, Beeson WT, Iavarone AT, Sun J, Marletta MA, Cate JH, Glass NL.	Proc Natl Acad Sci U S A. 2009 Dec 29;106(52):22157-62. doi: 10.1073/pnas.0906810106. Epub 2009 Dec 15.	PMID:20018766 | PMCID:PMC2794032
68	First principles insight into the alpha-glucan structures of starch: their synthesis, conformation, and hydration.	Damager I, Engelsen SB, Blennow A, Møller BL, Motawia MS.	Chem Rev. 2010 Apr 14;110(4):2049-80. doi: 10.1021/cr900227t. Review. No abstract available.	PMID:20302376 | PMCID:PMC2854524
69	Périgord black truffle genome uncovers evolutionary origins and mechanisms of symbiosis.	Martin F, Kohler A, Murat C, Balestrini R, Coutinho PM, Jaillon O, Montanini B, Morin E, Noel B, Percudani R, Porcel B, Rubini A, Amicucci A, Amselem J, Anthouard V, Arcioni S, Artiguenave F, Aury JM, Ballario P, Bolchi A, Brenna A, Brun A, et al.	Nature. 2010 Apr 15;464(7291):1033-8. doi: 10.1038/nature08867. Epub 2010 Mar 28.	PMID:20348908
70	Comparative transcriptome and secretome analysis of wood decay fungi Postia placenta and Phanerochaete chrysosporium.	Vanden Wymelenberg A, Gaskell J, Mozuch M, Sabat G, Ralph J, Skyba O, Mansfield SD, Blanchette RA, Martinez D, Grigoriev I, Kersten PJ, Cullen D.	Appl Environ Microbiol. 2010 Jun;76(11):3599-610. doi: 10.1128/AEM.00058-10. Epub 2010 Apr 16.	PMID:20400566 | PMCID:PMC2876446
71	Characterization of a new multigene family encoding isomaltases in the yeast Saccharomyces cerevisiae, the IMA family.	Teste MA, François JM, Parrou JL.	J Biol Chem. 2010 Aug 27;285(35):26815-24. doi: 10.1074/jbc.M110.145946. Epub 2010 Jun 18.	PMID:20562106 | PMCID:PMC2930680
72	Molecular identification of unsaturated uronate reductase prerequisite for alginate metabolism in Sphingomonas sp. A1.	Takase R, Ochiai A, Mikami B, Hashimoto W, Murata K.	Biochim Biophys Acta. 2010 Sep;1804(9):1925-36. doi: 10.1016/j.bbapap.2010.05.010. Epub 2010 May 27.	PMID:20685299
73	Expression of cellobiose dehydrogenase from Neurospora crassa in Pichia pastoris and its purification and characterization.	Zhang R, Fan Z, Kasuga T.	Protein Expr Purif. 2011 Jan;75(1):63-9. doi: 10.1016/j.pep.2010.08.003. Epub 2010 Aug 13.	PMID:20709172
74	Discovery and characterization of novel d-xylose-specific transporters from Neurospora crassa and Pichia stipitis.	Du J, Li S, Zhao H.	Mol Biosyst. 2010 Nov;6(11):2150-6. doi: 10.1039/c0mb00007h. Epub 2010 Aug 11.	PMID:20714641
75	Bioconversion of D-galacturonate to keto-deoxy-L-galactonate (3-deoxy-L-threo-hex-2-ulosonate) using filamentous fungi.	Wiebe MG, Mojzita D, Hilditch S, Ruohonen L, Penttilä M.	BMC Biotechnol. 2010 Aug 26;10:63. doi: 10.1186/1472-6750-10-63.	PMID:20796274 | PMCID:PMC2940921
76	Expression and characterization of the Neurospora crassa endoglucanase GH5-1.	Sun J, Phillips CM, Anderson CT, Beeson WT, Marletta MA, Glass NL.	Protein Expr Purif. 2011 Feb;75(2):147-54. doi: 10.1016/j.pep.2010.08.016. Epub 2010 Sep 6.	PMID:20826217
77	Cellodextrin transport in yeast for improved biofuel production.	Galazka JM, Tian C, Beeson WT, Martinez B, Glass NL, Cate JH.	Science. 2010 Oct 1;330(6000):84-6. doi: 10.1126/science.1192838. Epub 2010 Sep 9.	PMID:20829451
78	Overcoming glucose repression in mixed sugar fermentation by co-expressing a cellobiose transporter and a β-glucosidase in Saccharomyces cerevisiae.	Li S, Du J, Sun J, Galazka JM, Glass NL, Cate JH, Yang X, Zhao H.	Mol Biosyst. 2010 Nov;6(11):2129-32. doi: 10.1039/c0mb00063a. Epub 2010 Sep 27.	PMID:20871937
79	Temporal and spatial regulation of gene expression during asexual development of Neurospora crassa.	Greenwald CJ, Kasuga T, Glass NL, Shaw BD, Ebbole DJ, Wilkinson HH.	Genetics. 2010 Dec;186(4):1217-30. doi: 10.1534/genetics.110.121780. Epub 2010 Sep 27.	PMID:20876563 | PMCID:PMC2998306
80	Degradation of carbohydrate moieties of arabinogalactan-proteins by glycoside hydrolases from Neurospora crassa.	Takata R, Tokita K, Mori S, Shimoda R, Harada N, Ichinose H, Kaneko S, Igarashi K, Samejima M, Tsumuraya Y, Kotake T.	Carbohydr Res. 2010 Nov 22;345(17):2516-22. doi: 10.1016/j.carres.2010.09.006. Epub 2010 Sep 9.	PMID:20932514
81	Extracellular aldonolactonase from Myceliophthora thermophila.	Beeson WT 4th, Iavarone AT, Hausmann CD, Cate JH, Marletta MA.	Appl Environ Microbiol. 2011 Jan;77(2):650-6. doi: 10.1128/AEM.01922-10. Epub 2010 Nov 12.	PMID:21075873 | PMCID:PMC3020561
82	Engineered Saccharomyces cerevisiae capable of simultaneous cellobiose and xylose fermentation.	Ha SJ, Galazka JM, Kim SR, Choi JH, Yang X, Seo JH, Glass NL, Cate JH, Jin YS.	Proc Natl Acad Sci U S A. 2011 Jan 11;108(2):504-9. doi: 10.1073/pnas.1010456108. Epub 2010 Dec 27.	PMID:21187422 | PMCID:PMC3021080
83	Co-expression of a cellobiose phosphorylase and lactose permease enables intracellular cellobiose utilisation by Saccharomyces cerevisiae.	Sadie CJ, Rose SH, den Haan R, van Zyl WH.	Appl Microbiol Biotechnol. 2011 May;90(4):1373-80. doi: 10.1007/s00253-011-3164-z. Epub 2011 Feb 20.	PMID:21336923
84	Characterization of D-galacturonate reductase purified from the psychrophilic yeast species Cryptococcus diffluens.	Hamada S, Seike Y, Tanimori S, Sakamoto T, Kishida M.	J Biosci Bioeng. 2011 May;111(5):518-21. doi: 10.1016/j.jbiosc.2010.12.019. Epub 2011 Mar 8.	PMID:21388872
85	Analysis of a new family of widely distributed metal-independent alpha-mannosidases provides unique insight into the processing of N-linked glycans.	Gregg KJ, Zandberg WF, Hehemann JH, Whitworth GE, Deng L, Vocadlo DJ, Boraston AB.	J Biol Chem. 2011 Apr 29;286(17):15586-96. doi: 10.1074/jbc.M111.223172. Epub 2011 Mar 9.	PMID:21388958 | PMCID:PMC3083162
86	Quantitative proteomic approach for cellulose degradation by Neurospora crassa.	Phillips CM, Iavarone AT, Marletta MA.	J Proteome Res. 2011 Sep 2;10(9):4177-85. doi: 10.1021/pr200329b. Epub 2011 Aug 1.	PMID:21744778
87	Fungal enzyme sets for plant polysaccharide degradation.	van den Brink J, de Vries RP.	Appl Microbiol Biotechnol. 2011 Sep;91(6):1477-92. doi: 10.1007/s00253-011-3473-2. Epub 2011 Jul 23. Review.	PMID:21785931 | PMCID:PMC3160556
88	Oxidoreductive cellulose depolymerization by the enzymes cellobiose dehydrogenase and glycoside hydrolase 61.	Langston JA, Shaghasi T, Abbate E, Xu F, Vlasenko E, Sweeney MD.	Appl Environ Microbiol. 2011 Oct;77(19):7007-15. doi: 10.1128/AEM.05815-11. Epub 2011 Aug 5.	PMID:21821740 | PMCID:PMC3187118
89	Insights into the oxidative degradation of cellulose by a copper metalloenzyme that exploits biomass components.	Quinlan RJ, Sweeney MD, Lo Leggio L, Otten H, Poulsen JC, Johansen KS, Krogh KB, Jørgensen CI, Tovborg M, Anthonsen A, Tryfona T, Walter CP, Dupree P, Xu F, Davies GJ, Walton PH.	Proc Natl Acad Sci U S A. 2011 Sep 13;108(37):15079-84. doi: 10.1073/pnas.1105776108. Epub 2011 Aug 29.	PMID:21876164 | PMCID:PMC3174640
90	Identification of the CRE-1 cellulolytic regulon in Neurospora crassa.	Sun J, Glass NL.	PLoS One. 2011;6(9):e25654. doi: 10.1371/journal.pone.0025654. Epub 2011 Sep 29.	PMID:21980519 | PMCID:PMC3183063
91	Cellobiose dehydrogenase and a copper-dependent polysaccharide monooxygenase potentiate cellulose degradation by Neurospora crassa.	Phillips CM, Beeson WT, Cate JH, Marletta MA.	ACS Chem Biol. 2011 Dec 16;6(12):1399-406. doi: 10.1021/cb200351y. Epub 2011 Oct 25.	PMID:22004347
92	Self versus non-self: fungal cell wall degradation in Trichoderma.	Gruber S, Seidl-Seiboth V.	Microbiology. 2012 Jan;158(Pt 1):26-34. doi: 10.1099/mic.0.052613-0. Epub 2011 Aug 26. Review.	PMID:21873410
93	Characterisation of the gene cluster for l-rhamnose catabolism in the yeast Scheffersomyces (Pichia) stipitis.	Koivistoinen OM, Arvas M, Headman JR, Andberg M, Penttilä M, Jeffries TW, Richard P.	Gene. 2012 Jan 15;492(1):177-85. doi: 10.1016/j.gene.2011.10.031. Epub 2011 Oct 21.	PMID:22037608
94	Fungal chitinases: diversity, mechanistic properties and biotechnological potential.	Hartl L, Zach S, Seidl-Seiboth V.	Appl Microbiol Biotechnol. 2012 Jan;93(2):533-43. doi: 10.1007/s00253-011-3723-3. Epub 2011 Dec 2. Review.	PMID:22134638 | PMCID:PMC3257436
95	Oxidative cleavage of cellulose by fungal copper-dependent polysaccharide monooxygenases.	Beeson WT, Phillips CM, Cate JH, Marletta MA.	J Am Chem Soc. 2012 Jan 18;134(2):890-2. doi: 10.1021/ja210657t. Epub 2011 Dec 28.	PMID:22188218
96	An engineered microbial platform for direct biofuel production from brown macroalgae.	Wargacki AJ, Leonard E, Win MN, Regitsky DD, Santos CN, Kim PB, Cooper SR, Raisner RM, Herman A, Sivitz AB, Lakshmanaswamy A, Kashiyama Y, Baker D, Yoshikuni Y.	Science. 2012 Jan 20;335(6066):308-13. doi: 10.1126/science.1214547.	PMID:22267807
97	Deciphering transcriptional regulatory mechanisms associated with hemicellulose degradation in Neurospora crassa.	Sun J, Tian C, Diamond S, Glass NL.	Eukaryot Cell. 2012 Apr;11(4):482-93. doi: 10.1128/EC.05327-11. Epub 2012 Feb 17.	PMID:22345350 | PMCID:PMC3318299
98	Unravelling the molecular basis for light modulated cellulase gene expression - the role of photoreceptors in Neurospora crassa.	Schmoll M, Tian C, Sun J, Tisch D, Glass NL.	BMC Genomics. 2012 Mar 31;13:127. doi: 10.1186/1471-2164-13-127.	PMID:22462823 | PMCID:PMC3364853
99	Induction of lignocellulose-degrading enzymes in Neurospora crassa by cellodextrins.	Znameroski EA, Coradetti ST, Roche CM, Tsai JC, Iavarone AT, Cate JH, Glass NL.	Proc Natl Acad Sci U S A. 2012 Apr 17;109(16):6012-7. doi: 10.1073/pnas.1118440109. Epub 2012 Apr 2.	PMID:22474347 | PMCID:PMC3341005
100	Conserved and essential transcription factors for cellulase gene expression in ascomycete fungi.	Coradetti ST, Craig JP, Xiong Y, Shock T, Tian C, Glass NL.	Proc Natl Acad Sci U S A. 2012 May 8;109(19):7397-402. doi: 10.1073/pnas.1200785109. Epub 2012 Apr 24.	PMID:22532664 | PMCID:PMC3358856
101	Production and effect of aldonic acids during enzymatic hydrolysis of lignocellulose at high dry matter content.	Cannella D, Hsieh CW, Felby C, Jørgensen H.	Biotechnol Biofuels. 2012 Apr 30;5(1):26.	PMID:22546481 | PMCID:PMC3458932
102	Structural basis for substrate targeting and catalysis by fungal polysaccharide monooxygenases.	Li X, Beeson WT 4th, Phillips CM, Marletta MA, Cate JH.	Structure. 2012 Jun 6;20(6):1051-61. doi: 10.1016/j.str.2012.04.002. Epub 2012 May 10.	PMID:22578542 | PMCID:PMC3753108
103	The Neurospora crassa dfg5 and dcw1 genes encode α-1,6-mannanases that function in the incorporation of glycoproteins into the cell wall.	Maddi A, Fu C, Free SJ.	PLoS One. 2012;7(6):e38872. doi: 10.1371/journal.pone.0038872. Epub 2012 Jun 11.	PMID:22701726 | PMCID:PMC3372484
104	Characterization of the two Neurospora crassa cellobiose dehydrogenases and their connection to oxidative cellulose degradation.	Sygmund C, Kracher D, Scheiblbrandner S, Zahma K, Felice AK, Harreither W, Kittl R, Ludwig R.	Appl Environ Microbiol. 2012 Sep;78(17):6161-71. doi: 10.1128/AEM.01503-12. Epub 2012 Jun 22.	PMID:22729546 | PMCID:PMC3416632
105	A time course analysis of the extracellular proteome of Aspergillus nidulans growing on sorghum stover.	Saykhedkar S, Ray A, Ayoubi-Canaan P, Hartson SD, Prade R, Mort AJ.	Biotechnol Biofuels. 2012 Jul 26;5(1):52. doi: 10.1186/1754-6834-5-52.	PMID:22835028 | PMCID:PMC3413557
106	Characterization of a broad-specificity β-glucanase acting on β-(1,3)-, β-(1,4)-, and β-(1,6)-glucans that defines a new glycoside hydrolase family.	Lafond M, Navarro D, Haon M, Couturier M, Berrin JG.	Appl Environ Microbiol. 2012 Dec;78(24):8540-6. doi: 10.1128/AEM.02572-12. Epub 2012 Sep 28.	PMID:23023747 | PMCID:PMC3502917
107	Production of four Neurospora crassa lytic polysaccharide monooxygenases in Pichia pastoris monitored by a fluorimetric assay.	Kittl R, Kracher D, Burgstaller D, Haltrich D, Ludwig R.	Biotechnol Biofuels. 2012 Oct 26;5(1):79. doi: 10.1186/1754-6834-5-79.	PMID:23102010 | PMCID:PMC3500269
108	Biosynthesis of the fungal cell wall polysaccharide galactomannan requires intraluminal GDP-mannose.	Engel J, Schmalhorst PS, Routier FH.	J Biol Chem. 2012 Dec 28;287(53):44418-24. doi: 10.1074/jbc.M112.398321. Epub 2012 Nov 8.	PMID:23139423 | PMCID:PMC3531755
109	Energetic benefits and rapid cellobiose fermentation by Saccharomyces cerevisiae expressing cellobiose phosphorylase and mutant cellodextrin transporters.	Ha SJ, Galazka JM, Joong Oh E, Kordić V, Kim H, Jin YS, Cate JH.	Metab Eng. 2013 Jan;15:134-43. doi: 10.1016/j.ymben.2012.11.005. Epub 2012 Nov 22.	PMID:23178501
110	Discovery of an L-fucono-1,5-lactonase from cog3618 of the amidohydrolase superfamily.	Hobbs ME, Vetting M, Williams HJ, Narindoshvili T, Kebodeaux DM, Hillerich B, Seidel RD, Almo SC, Raushel FM.	Biochemistry. 2013 Jan 8;52(1):239-53. doi: 10.1021/bi3015554. Epub 2012 Dec 20.	PMID:23214453 | PMCID:PMC3542637
111	Direct cellobiose production from cellulose using sextuple beta-glucosidase gene deletion Neurospora crassa mutants.	Wu W, Hildebrand A, Kasuga T, Xiong X, Fan Z.	Enzyme Microb Technol. 2013 Mar 5;52(3):184-9. doi: 10.1016/j.enzmictec.2012.12.010. Epub 2013 Jan 7.	PMID:23410930
112	SUN proteins belong to a novel family of β-(1,3)-glucan-modifying enzymes involved in fungal morphogenesis.	Gastebois A, Aimanianda V, Bachellier-Bassi S, Nesseir A, Firon A, Beauvais A, Schmitt C, England P, Beau R, Prévost MC, d'Enfert C, Latgé JP, Mouyna I.	J Biol Chem. 2013 May 10;288(19):13387-96. doi: 10.1074/jbc.M112.440172. Epub 2013 Mar 18.	PMID:23508952 | PMCID:PMC3650377
113	β-1,3-glucan modifying enzymes in Aspergillus fumigatus.	Mouyna I, Hartl L, Latgé JP.	Front Microbiol. 2013;4:81. doi: 10.3389/fmicb.2013.00081.	PMID:23616783 | PMCID:PMC3627985
114	Analysis of a conserved cellulase transcriptional regulator reveals inducer-independent production of cellulolytic enzymes in Neurospora crassa.	Coradetti ST, Xiong Y, Glass NL.	Microbiologyopen. 2013 Aug;2(4):595-609. doi: 10.1002/mbo3.94. Epub 2013 Jun 14.	PMID:23766336 | PMCID:PMC3948607
115	Hemicellulose biosynthesis.	Pauly M, Gille S, Liu L, Mansoori N, de Souza A, Schultink A, Xiong G.	Planta. 2013 Oct;238(4):627-42. doi: 10.1007/s00425-013-1921-1. Epub 2013 Jun 26. Review.	PMID:23801299
116	Plant cell wall deconstruction by ascomycete fungi.	Glass NL, Schmoll M, Cate JH, Coradetti S.	Annu Rev Microbiol. 2013;67:477-98. doi: 10.1146/annurev-micro-092611-150044. Epub 2013 Jun 28. Review.	PMID:23808333
117	Discovery of cellobionic acid phosphorylase in cellulolytic bacteria and fungi.	Nihira T, Saito Y, Nishimoto M, Kitaoka M, Igarashi K, Ohtsubo K, Nakai H.	FEBS Lett. 2013 Nov 1;587(21):3556-61. doi: 10.1016/j.febslet.2013.09.014. Epub 2013 Sep 19.	PMID:24055472
118	A comparative systems analysis of polysaccharide-elicited responses in Neurospora crassa reveals carbon source-specific cellular adaptations.	Benz JP, Chau BH, Zheng D, Bauer S, Glass NL, Somerville CR.	Mol Microbiol. 2014 Jan;91(2):275-99. doi: 10.1111/mmi.12459. Epub 2013 Dec 4.	PMID:24224966 | PMCID:PMC3900418
119	A C4-oxidizing lytic polysaccharide monooxygenase cleaving both cellulose and cello-oligosaccharides.	Isaksen T, Westereng B, Aachmann FL, Agger JW, Kracher D, Kittl R, Ludwig R, Haltrich D, Eijsink VG, Horn SJ.	J Biol Chem. 2014 Jan 31;289(5):2632-42. doi: 10.1074/jbc.M113.530196. Epub 2013 Dec 9.	PMID:24324265 | PMCID:PMC3908397
120	Identification and characterization of a galacturonic acid transporter from Neurospora crassa and its application for Saccharomyces cerevisiae fermentation processes.	Benz JP, Protzko RJ, Andrich JM, Bauer S, Dueber JE, Somerville CR.	Biotechnol Biofuels. 2014 Feb 6;7(1):20. doi: 10.1186/1754-6834-7-20.	PMID:24502254 | PMCID:PMC3933009
121	Transcriptional comparison of the filamentous fungus Neurospora crassa growing on three major monosaccharides D-glucose, D-xylose and L-arabinose.	Li J, Lin L, Li H, Tian C, Ma Y.	Biotechnol Biofuels. 2014 Feb 28;7(1):31. doi: 10.1186/1754-6834-7-31.	PMID:24581151 | PMCID:PMC4015282
122	Evidence of a critical role for cellodextrin transporte 2 (CDT-2) in both cellulose and hemicellulose degradation and utilization in Neurospora crassa.	Cai P, Gu R, Wang B, Li J, Wan L, Tian C, Ma Y.	PLoS One. 2014;9(2):e89330. doi: 10.1371/journal.pone.0089330.	PMID:24586693 | PMCID:PMC3930720
123	Discovering functions of unannotated genes from a transcriptome survey of wild fungal isolates.	Ellison CE, Kowbel D, Glass NL, Taylor JW, Brem RB.	MBio. 2014 Apr 1;5(2):e01046-13. doi: 10.1128/mBio.01046-13.	PMID:24692637 | PMCID:PMC3977361
124	Discovery of LPMO activity on hemicelluloses shows the importance of oxidative processes in plant cell wall degradation.	Agger JW, Isaksen T, Várnai A, Vidal-Melgosa S, Willats WG, Ludwig R, Horn SJ, Eijsink VG, Westereng B.	Proc Natl Acad Sci U S A. 2014 Apr 29;111(17):6287-92. doi: 10.1073/pnas.1323629111. Epub 2014 Apr 14.	PMID:24733907 | PMCID:PMC4035949
125	The proteome and phosphoproteome of Neurospora crassa in response to cellulose, sucrose and carbon starvation.	Xiong Y, Coradetti ST, Li X, Gritsenko MA, Clauss T, Petyuk V, Camp D, Smith R, Cate JH, Yang F, Glass NL.	Fungal Genet Biol. 2014 Nov;72:21-33. doi: 10.1016/j.fgb.2014.05.005. Epub 2014 May 29.	PMID:24881580 | PMCID:PMC4247816
126	Overcoming inefficient cellobiose fermentation by cellobiose phosphorylase in the presence of xylose.	Chomvong K, Kordić V, Li X, Bauer S, Gillespie AE, Ha SJ, Oh EJ, Galazka JM, Jin YS, Cate JH.	Biotechnol Biofuels. 2014;7:85. doi: 10.1186/1754-6834-7-85.	PMID:24944578 | PMCID:PMC4061319
127	A family of starch-active polysaccharide monooxygenases.	Vu VV, Beeson WT, Span EA, Farquhar ER, Marletta MA.	Proc Natl Acad Sci U S A. 2014 Sep 23;111(38):13822-7. doi: 10.1073/pnas.1408090111. Epub 2014 Sep 8.	PMID:25201969 | PMCID:PMC4183312
128	The putative cellodextrin transporter-like protein CLP1 is involved in cellulase induction in Neurospora crassa.	Cai P, Wang B, Ji J, Jiang Y, Wan L, Tian C, Ma Y.	J Biol Chem. 2015 Jan 9;290(2):788-96. doi: 10.1074/jbc.M114.609875. Epub 2014 Nov 14.	PMID:25398875 | PMCID:PMC4294501
129	Expanding xylose metabolism in yeast for plant cell wall conversion to biofuels.	Li X, Yu VY, Lin Y, Chomvong K, Estrela R, Park A, Liang JM, Znameroski EA, Feehan J, Kim SR, Jin YS, Glass NL, Cate JH.	Elife. 2015 Feb 3;4. doi: 10.7554/eLife.05896.	PMID:25647728 | PMCID:PMC4338637
130	Functional Analysis of Two l-Arabinose Transporters from Filamentous Fungi Reveals Promising Characteristics for Improved Pentose Utilization in Saccharomyces cerevisiae.	Li J, Xu J, Cai P, Wang B, Ma Y, Benz JP, Tian C.	Appl Environ Microbiol. 2015 Jun 15;81(12):4062-70. doi: 10.1128/AEM.00165-15. Epub 2015 Apr 3.	PMID:25841015 | PMCID:PMC4524138
131	Structural and Functional Characterization of a Lytic Polysaccharide Monooxygenase with Broad Substrate Specificity.	Borisova AS, Isaksen T, Dimarogona M, Kognole AA, Mathiesen G, Várnai A, Røhr ÅK, Payne CM, Sørlie M, Sandgren M, Eijsink VG.	J Biol Chem. 2015 Sep 18;290(38):22955-69. doi: 10.1074/jbc.M115.660183. Epub 2015 Jul 15.	PMID:26178376
132	Cellobionic acid utilization: from Neurospora crassa to Saccharomyces cerevisiae.	Li X, Chomvong K, Yu VY, Liang JM, Lin Y, Cate JH.	Biotechnol Biofuels. 2015;8:120. doi: 10.1186/s13068-015-0303-2.	PMID:26279678 | PMCID:PMC4537572
133	Deletion of homologs of the SREPB pathway results in hyper-production of cellulases in Neurospora crassa and Trichoderma reesei.	Reilly MC, Qin L, Craig JP, Starr TL, Glass NL.	Biotechnol Biofuels. 2015;8:121. doi: 10.1186/s13068-015-0297-9.	PMID:26288653 | PMCID:PMC4539670

## Sheet: Structure_of_Polysaccharides
Polysaccharide	Position	Unit	Linkage	Notes	References
Cellulose	Backbone	β-D-glucose	β-1,4 linked	Cellulose (Glass et al., 2013; Popper et al., 2011; van den Brink and de Vries, 2011) is a linear chain polymer of β-1,4-linked D-glucose residues. The linear chains of cellulose form a hydrogen bond network leading to a crystalline structure. The hydroxyl groups on D-glucose of one linear chain form hydrogen bonds with oxygen atoms on the same or a neighboring chain leading to densely packed str…	21785931 23801299
Hemicellulose				Hemicelluloses (Glass et al., 2013; Pauly et al., 2013; Scheller and Ulvskov, 2010) contain several polymers including xylan, xyloglucan (XG), mannan and mixed-linkage glucan (MLG), and these polymers can be distinguished based on the sugar in their backbone. The backbone of xylan is β-1,4-linked D-xylose, mannan is β-1,4-linked D-mannose, XG is β-1,4-linked D-glucose, and MLG is β-1,4-linked or …	21785931 23801299 23808333
Xylan	Backbone	D-xylose	β-1,4 linked
	Side Chain	L-arabinose	α-1,2 or α-1,3 linked
	Side Chain	D-galactose	β-1,4 or α-1,4 linked
	Side Chain	D-glucuronic acid	α-1,2 linked
	Side Chain	Acetyl group	O-2 or O-3
	Side Chain	Ferulic acid	O-5
Xyloglucan (XG)	Backbone	β-D-glucose	β-1,4 linked
	Side Chain	D-xylose	α-1,6 linked
	Side Chain	D-galactose	β-1,2 linked
	Side Chain	L-arabinose	α-1,2 linked
	Side Chain	L-fucose	α-1,2 linked
	Side Chain	Acetyl group	O-2 or O-3
Mannan	Backbone	D-mannose	β-1,4 linked
Galactomannan	Backbone	D-mannose	β-1,4 linked
	Side Chain	D-galactose	β-1,4 or α-1,6 linked	Terminal D-galactose can be linked via β-1,4
	Side Chain	Acetyl group	O-2 or O-3
Glucomannan	Backbone	D-mannose and β-D-glucose	β-1,4 linked	D-mannose and β-D-glucose ratio differs among plants
	Side Chain	D-galactose	β-1,4 or α-1,6 linked	Terminal D-galactose can be linked via β-1,4
	Side Chain	Acetyl group	O-2 or O-3
Galactoglucomannan	Backbone	D-mannose & β-D-glucose	β-1,4 linked	D-mannose and β-D-glucose ratio differs among plants
	Side Chain	D-galactose	β-1,4 or α-1,6 linked	Terminal D-galactose can be linked via β-1,4
	Side Chain	Acetyl group	O-2 or O-3
Mixed Linkage Glucan (MLG)	Backbone	β-D-glucose	β-1,4 or β-1,3 linked	Streches of β-1,4 linked D-glucose separated by β-1,3 linkages
Pectin				Pectin (Glass et al., 2013; Mohnen, 2008) is a minor constituent of plant cell wall in comparison to cellulose and hemicellulose, and is composed of several polymers including homogalacturonan, xylogalacturonan and rhamnogalacturonan I. The backbone of homogalacturonan and xylogalacturonan consists of α-1,4-linked D-galacturonic acid residues that may be methyl-esterified or substituted with acet…	18486536 21785931 23808333
Homogalacturonan	Backbone	D-galacturonic acid	α-1,4 linked
	Side Chain	Acetyl group	O-2 or O-3
	Side Chain	Methyl group	C-6
	Side Chain	Ferulic acid	O-5
Xylogalacturonan	Backbone	D-galacturonic acid	α-1,4 linked
	Side Chain	D-xylose	β-1,4 linked
	Side Chain	Acetyl group	O-2 or O-3
	Side Chain	Methyl group	C-6
	Side Chain	Ferulic acid	O-5
Rhamnogalacturonan I	Backbone	D-galacturonic acid & L-rhamnose	α-1,2 linked
	Side Chain	L-arabinan	α-1,5 linked
	Side Chain	D-galactan	β-1,4 linked
	Side Chain	D-glucuronic acid	β-1,6 linked
	Side Chain	Methyl group	C-6
	Side Chain	Acetyl group	O-2 or O-3
	Side Chain	Ferulic acid	O-5
Starch				Starch (Damager et al., 2010) is a trace component of plant cell wall composed of two polymers: amylose and amylopectin. Amylose has a backbone of α-1,4-linked D-glucose residues while amylopectin has a more complex structure with a backbone of α-1,4-linked D-glucose residues and branching with α-1,6-linkages every 24 to 30 D-glucose units.	20302376
Amylose	Backbone	α-D-glucose	α-1,4 linked
Amylopectin	Backbone	α-D-glucose	α-1,4 linked
	Side Chain	α-D-glucose	α-1,6 linked
